# Supplementary material for: Waterpipe Nicotine Dependence and Depressive Symptoms among Adolescent Waterpipe and Dual Users
Source: J Environ Public Health. 2020 Nov 6;2020:2364571. doi: 10.1155/2020/2364571 (PMC7665911; doi:10.1155/2020/2364571)
Supplement: Supplementary Materials — This is the STATA dataset that was used in this paper. For additional information, inquiries or use of the dataset please contact the corresponding author. [file 2364571.f1.txt]

sex	grade	age	nationality	fatherjob	fathercurrentwork	mothersjob	mothercurrentwork	lastyeargpa	depression1	depression2	depression3	depression4	depression5	depression6	familymembersnum	Dep1	Dep2	Dep3	Dep4	Dep5	Dep6	Dep7	Dep8	Dep9	Dep10	Dep11	Dep12	Dep13	Dep14	Dep15	Dep16	Dep17	Dep18	Dep19	Dep20	Dep21	Dep22	Dep23	Dep24	Dep25	Dep26	Dep27	Dep28	Dep29	Dep30	Dep31	Dep32	Dep33	Dep34
1	0	0	1	1	1	3	0	4	1	1	1	1	1	1	0	1	1	1	1	1	1	1	1	1	1	1	1	1	1	1	1	1	1	1	1	1	1	1	1	1	1	1	1	1	1	1	1	1	1
1	0	0	1	1	1	3	0	4	1	1	1	1	1	1	0	1	1	1	1	1	1	1	1	1	1	1	1	1	1	1	1	1	1	1	1	1	1	1	1	1	1	1	1	1	1	1	1	1	1
1	0	0	1	1	1	3	0	4	1	2	2	4	2	4	12	1	1	5	3	4	2	1	4	5	3	4	3	5	2	5	4	4	3	2	3	3	2	3	5	4	3	4	3	2	5	1	5	3	3
1	0	0	1	2	1	3	0	3	2	1	1	1	1	1	0	1	1	1	1	1	1	1	1	1	1	1	1	1	1	1	1	1	1	1	1	1	1	1	1	1	1	1	1	1	1	1	1	1	1
1	0	0	3	1	1	3	0	2	2	2	1	1	1	1	12	1	1	1	1	1	1	1	1	1	1	1	1	1	1	1	1	1	1	1	1	1	1	1	1	1	1	1	1	1	1	1	1	1	1
1	0	0	1	1	1	3	0	4	1	3	4	4	1	1	30	5	3	1	5	5	1	1	1	1	1	1	1	1	1	1	1	1	1	1	1	1	1	1	1	1	1	1	1	1	1	1	1	1	1
1	0	1	1	2	0	2	0	3	1	1	1	1	1	2	7	1	1	1	1	1	1	1	1	1	1	1	1	1	1	1	1	1	4	1	1	1	1	1	1	1	1	1	1	1	1	1	1	1	1
1	0	1	1	1	1	3	0	2	1	1	1	1	1	1	0	1	1	1	1	1	1	1	1	1	1	1	1	1	1	1	1	1	1	1	1	1	1	1	1	1	1	1	1	1	1	1	1	1	1
1	0	2	3	1	0	3	0	3	1	1	2	2	2	1	10	1	1	1	1	1	1	2	1	1	1	1	1	1	2	1	2	1	1	1	1	1	4	1	1	3	1	1	1	1	1	1	1	1	1
1	0	1	1	1	1	3	0	3	2	1	1	2	1	1	0	3	4	1	1	1	2	1	1	2	3	1	1	1	1	1	1	1	1	1	1	1	5	3	5	1	1	1	2	2	1	1	1	1	1
1	0	0	1	1	1	3	0	4	1	1	1	1	1	1	0	1	1	1	1	1	1	1	1	1	1	1	1	1	1	1	1	1	1	1	1	1	1	1	1	1	1	1	1	1	1	1	1	1	1
1	0	0	1	1	0	3	0	3	1	1	1	1	1	1	6	1	1	1	1	1	1	1	1	1	1	1	1	1	1	1	1	1	1	1	1	1	1	1	1	1	1	1	1	1	1	4	4	1	4
1	0	0	1	2	1	3	0	3	1	1	1	1	1	2	7	1	1	1	1	1	1	1	1	1	1	1	4	1	4	4	4	1	4	1	1	1	4	1	1	1	1	1	4	4	4	1	1	4	1
1	0	0	1	1	1	3	0	4	1	4	1	2	1	2	0	1	1	1	1	1	1	1	1	1	1	1	1	1	1	1	1	1	1	1	1	1	1	1	1	1	1	1	1	1	1	1	1	1	1
1	0	0	1	2	1	2	1	4	1	1	1	1	1	1	7	1	1	1	1	1	1	1	1	1	1	1	1	1	1	1	1	1	1	1	1	1	1	1	1	1	1	1	1	1	1	1	1	1	1
1	0	0	1	1	1	1	0	2	2	4	1	1	1	1	4	1	1	1	1	1	1	1	1	1	1	1	1	1	1	1	1	1	1	1	1	1	1	1	1	1	1	1	1	1	1	1	1	1	1
1	0	0	1	0	0	3	0	4	2	1	2	1	3	1	5	2	1	1	1	1	3	3	4	1	4	4	2	1	2	4	5	1	2	1	1	1	2	2	1	1	1	3	5	3	1	1	1	3	1
1	0	0	1	1	1	3	0	3	1	1	1	1	1	1	4	1	1	1	1	1	1	2	1	1	1	1	1	1	1	1	1	1	1	1	1	1	1	1	1	1	1	1	1	1	1	1	1	1	1
1	0	1	1	1	0	3	0	3	1	1	1	1	1	1	0	4	1	1	1	1	1	1	1	1	1	1	1	1	1	1	1	1	1	1	1	1	1	1	1	1	1	1	1	1	1	1	1	1	1
1	0	1	1	2	1	3	0	1	1	1	1	1	1	1	0	1	1	1	1	1	1	1	1	1	1	1	1	1	1	1	1	1	1	1	1	1	1	1	1	1	1	1	1	1	1	1	1	1	1
1	0	1	1	1	1	3	0	2	1	1	1	2	1	1	7	1	1	1	1	4	1	1	1	1	1	1	1	1	1	1	1	1	1	1	1	1	1	1	1	1	1	1	1	1	1	1	1	1	1
1	0	1	1	1	1	3	0	3	2	1	1	1	1	1	5	3	1	1	1	1	1	1	1	1	1	4	1	1	1	1	1	1	1	1	1	1	1	1	1	1	1	1	1	1	1	1	1	1	1
1	0	1	1	2	1	3	0	4	1	1	1	1	1	1	7	1	1	1	1	1	1	1	1	1	1	1	1	1	1	1	1	1	1	1	1	1	1	1	1	1	1	1	1	1	1	1	1	1	1
1	0	1	1	1	0	3	0	4	3	3	1	2	1	3	6	1	1	5	1	1	2	4	3	4	1	2	3	5	2	5	1	4	1	1	1	1	1	1	3	1	1	1	3	2	1	1	1	1	1
1	0	1	1	2	1	3	0	2	1	1	1	1	1	1	6	1	1	1	4	4	1	1	1	5	5	1	1	5	5	5	1	5	5	1	5	1	5	1	1	1	1	1	1	1	1	1	1	1	1
1	0	1	1	1	1	3	0	2	1	1	1	1	1	2	5	1	1	1	1	1	1	1	1	1	1	1	1	1	1	1	1	1	1	1	5	1	1	1	1	1	1	1	1	1	1	1	1	1	1
1	0	1	1	2	1	3	0	4	1	1	1	1	1	1	6	2	5	4	1	1	4	2	4	1	3	3	2	2	3	2	2	4	2	1	2	1	1	1	1	2	2	4	2	2	4	1	1	1	1
1	0	1	1	1	1	3	0	4	1	1	1	2	1	1	4	1	1	1	1	1	1	1	1	1	1	1	1	1	1	1	1	1	1	1	1	1	1	1	1	1	1	1	1	1	1	1	1	1	1
1	0	1	1	1	0	3	0	4	2	1	2	1	3	1	5	1	1	1	1	1	1	4	1	1	5	5	2	1	3	2	5	1	2	1	1	1	2	2	1	1	1	1	5	2	1	1	1	1	1
1	0	1	1	1	1	3	0	2	1	1	1	1	2	1	5	1	1	1	1	4	1	1	1	1	1	1	1	1	1	1	1	1	1	1	1	1	1	1	1	1	1	1	1	1	1	1	1	1	1
1	0	1	1	2	1	2	1	4	1	1	2	1	1	1	6	1	1	1	1	1	1	1	1	1	1	1	1	1	1	1	1	1	1	1	1	2	1	1	1	1	1	1	1	1	1	1	1	1	1
1	0	1	1	2	1	3	0	4	1	1	1	1	1	1	3	1	1	2	1	1	1	1	1	1	1	1	1	1	1	1	1	1	1	1	4	4	4	1	1	1	1	1	1	1	1	1	1	1	1
1	0	1	1	1	1	3	0	3	1	1	1	2	2	1	5	1	1	1	2	2	1	1	1	1	1	1	1	1	1	1	1	1	1	1	1	1	2	1	1	1	1	1	1	1	1	1	1	1	2
1	0	1	1	1	1	3	0	3	4	1	1	1	1	1	10	1	1	1	1	1	1	1	1	1	1	1	1	1	1	1	1	1	1	1	1	1	1	1	1	1	1	1	1	1	1	1	1	1	1
1	0	1	1	2	1	3	0	2	4	4	1	1	1	1	8	2	2	4	1	2	2	2	1	1	1	2	2	2	2	1	1	1	1	1	1	1	2	1	1	1	1	1	2	4	4	1	1	1	1
1	0	1	1	2	1	3	0	4	1	1	1	1	1	1	0	1	1	1	1	1	1	1	1	1	1	1	1	1	1	1	1	1	1	1	1	1	1	1	1	1	1	1	1	1	1	1	1	1	1
1	0	1	1	2	0	3	0	1	1	1	1	1	1	1	9	1	1	1	1	1	1	1	1	1	1	1	1	1	1	1	1	1	1	1	1	1	1	1	1	1	1	1	1	1	1	1	1	1	1
1	0	1	1	1	0	3	0	3	1	1	1	1	1	1	13	1	1	1	1	1	1	1	1	1	1	1	1	1	1	1	1	1	1	1	1	1	1	1	1	1	1	1	1	1	1	1	1	1	1
1	0	1	1	2	1	2	0	4	1	1	1	1	1	1	6	1	1	1	1	1	1	1	1	1	1	1	1	1	1	1	1	1	1	1	1	1	1	1	1	1	1	1	1	1	1	1	1	1	1
1	0	1	1	1	1	3	0	3	1	1	1	1	1	1	10	5	5	1	1	3	1	1	1	1	5	5	5	2	1	1	5	1	3	3	1	5	4	3	1	1	5	5	1	3	1	5	1	1	1
1	0	1	1	1	1	3	0	1	3	3	1	1	4	1	6	5	5	1	1	1	1	5	5	1	5	1	1	1	5	1	5	5	5	1	1	1	1	4	2	5	5	5	5	5	1	3	5	5	1
1	0	1	1	1	1	3	0	3	1	2	3	2	1	1	7	1	1	1	1	3	1	1	1	1	1	1	1	1	1	1	1	1	1	1	1	1	1	1	1	1	1	1	1	1	1	1	1	1	1
1	0	1	1	1	1	3	0	4	1	2	4	4	2	1	4	1	1	1	1	1	1	1	1	1	1	1	1	1	1	1	1	1	1	1	1	1	1	1	1	1	1	1	1	1	1	1	1	1	1
1	0	1	1	1	1	3	0	3	2	3	2	1	1	3	30	1	1	1	3	3	1	1	1	1	1	1	1	1	1	1	1	1	1	1	1	1	1	1	1	1	1	1	1	1	1	1	1	1	1
1	0	1	1	1	1	3	0	2	1	1	1	1	1	1	9	1	1	1	1	1	1	1	1	1	1	1	1	1	1	1	1	1	1	1	1	1	1	1	1	1	1	1	1	1	1	1	1	1	1
1	0	1	1	2	1	2	0	3	1	1	2	1	1	1	7	1	3	4	1	3	3	4	1	1	4	5	3	2	3	2	5	4	5	5	5	1	3	3	1	4	4	5	5	5	3	1	3	5	1
1	0	1	1	2	1	3	0	2	1	2	2	1	4	1	10	1	3	3	3	1	1	1	1	1	1	1	1	1	1	1	1	1	1	1	1	1	1	1	5	1	1	5	1	5	5	5	5	5	5
1	0	1	1	2	1	3	0	0	2	1	1	1	1	1	30	5	5	5	5	5	5	5	5	5	5	5	5	5	5	5	5	5	5	5	5	5	5	5	5	5	5	5	5	5	5	5	5	5	5
1	0	1	1	2	1	3	0	3	1	1	1	1	1	1	6	1	1	1	1	1	1	1	1	1	1	1	1	1	1	1	1	1	1	1	1	1	1	1	1	1	1	1	1	1	1	1	1	1	1
1	0	1	1	2	1	3	0	2	1	1	1	1	1	1	5	1	1	1	1	1	1	1	1	1	1	1	1	1	1	1	1	1	1	1	1	1	1	1	1	1	1	1	1	1	1	1	1	1	1
1	0	1	1	2	1	3	0	2	1	2	3	4	1	1	3	4	1	5	5	1	5	3	1	1	1	1	1	2	1	2	1	1	1	1	1	3	3	1	1	5	5	3	1	1	1	1	5	3	4
1	0	1	1	2	1	3	0	3	3	3	1	1	1	1	8	1	1	1	1	1	1	1	1	1	1	1	1	1	1	1	1	1	1	1	1	1	1	1	1	1	1	1	1	1	1	1	1	1	1
1	0	1	1	2	0	3	0	2	1	1	1	2	2	1	15	1	1	1	1	1	1	1	1	1	1	1	1	1	1	1	1	1	1	1	1	1	1	1	1	1	1	1	1	1	1	1	1	1	1
1	0	1	1	0	0	2	1	3	1	1	1	4	2	2	11	3	1	1	1	1	1	1	1	1	1	2	1	1	2	1	1	1	1	1	1	1	1	1	1	1	1	1	1	1	1	1	1	1	1
1	0	1	1	0	0	3	0	1	2	2	1	3	4	3	14	4	1	4	1	5	1	1	5	1	4	1	2	1	1	1	1	1	1	1	1	1	1	1	1	1	1	1	1	1	1	1	1	1	1
1	0	1	1	1	1	1	0	2	4	1	1	1	1	1	8	5	5	5	4	3	5	5	5	5	5	5	1	5	2	5	3	5	5	2	5	5	1	5	1	2	5	5	5	5	5	5	5	5	1
1	0	1	1	1	1	2	0	4	1	1	1	1	1	1	5	1	1	1	1	1	1	1	1	1	1	1	1	1	1	1	1	1	1	1	1	1	1	1	1	1	1	1	1	1	1	1	1	1	1
1	0	1	1	1	1	2	0	3	1	1	1	1	1	1	15	1	1	1	1	1	1	1	1	1	1	1	1	1	1	1	1	1	1	1	1	1	1	1	1	1	1	1	1	1	1	3	1	1	1
1	0	1	1	1	1	3	0	4	1	1	1	1	1	1	8	1	1	1	1	1	1	1	1	1	1	1	1	1	1	1	1	1	1	5	1	1	1	1	1	1	1	1	1	1	1	1	1	1	1
1	0	1	1	1	1	3	0	4	1	2	4	3	4	1	6	1	1	1	1	1	1	1	1	1	1	1	1	1	1	1	1	1	1	4	4	1	4	1	4	1	4	4	4	1	1	1	4	4	1
1	0	1	1	1	1	3	0	2	1	1	1	2	1	1	9	4	4	4	1	1	5	4	4	1	1	3	3	1	1	1	1	1	1	4	1	1	4	1	1	4	4	1	4	1	4	4	1	1	1
1	0	1	1	1	1	3	0	1	1	1	1	1	3	1	0	1	1	1	1	1	1	1	1	1	1	1	1	1	1	1	1	1	1	1	1	1	1	1	1	1	1	1	1	1	1	1	1	1	1
1	0	1	1	1	1	3	0	1	1	1	1	1	1	1	6	1	1	1	1	1	1	1	1	1	1	1	1	1	1	1	1	1	1	1	1	1	1	1	1	1	1	1	1	1	1	1	1	1	1
1	0	1	1	1	1	3	0	1	1	1	2	1	1	1	5	1	1	1	1	1	1	1	1	1	1	1	1	1	1	1	1	1	1	1	1	1	1	1	1	1	1	1	1	1	1	1	1	1	1
1	0	1	1	1	1	3	0	3	4	1	3	2	2	1	0	1	1	1	1	1	1	1	1	1	1	1	1	1	1	1	1	1	1	1	1	1	1	1	1	1	1	1	1	1	1	1	1	1	1
1	0	1	1	1	1	3	0	3	3	2	1	2	1	3	5	1	1	1	1	1	1	1	1	1	1	1	1	1	1	1	1	1	1	1	1	1	1	1	1	1	1	1	1	1	1	1	1	1	1
1	0	1	1	1	1	3	0	4	1	1	2	1	1	1	6	1	1	1	1	1	1	1	1	1	1	1	1	1	1	1	1	1	1	1	1	1	1	1	1	1	1	1	1	1	1	1	1	1	1
1	0	1	1	1	0	3	0	2	1	1	1	1	1	1	28	1	1	1	1	1	1	1	1	1	1	1	1	1	1	1	1	1	1	1	1	1	1	1	1	1	1	1	1	1	1	1	1	1	1
1	0	1	1	1	0	3	0	3	3	3	1	2	1	1	9	1	1	1	1	1	1	1	1	1	1	1	1	1	1	1	1	1	1	1	1	1	1	1	1	1	1	1	1	1	1	1	1	1	1
1	0	1	1	2	1	2	1	4	1	1	1	2	1	1	7	1	1	1	1	1	1	2	1	1	1	1	4	1	1	1	1	1	1	1	1	1	2	1	1	1	1	1	3	5	1	1	1	1	1
1	0	1	1	2	1	2	1	2	2	2	2	2	2	2	8	1	1	1	1	1	1	1	1	1	1	1	1	1	1	1	1	1	1	1	1	1	1	1	1	1	1	1	1	1	1	1	1	1	1
1	0	1	1	2	1	3	0	3	1	1	1	2	1	1	9	1	1	1	1	1	1	1	1	1	1	1	1	1	1	1	1	1	1	1	1	1	1	1	1	1	1	1	1	1	1	1	1	1	1
1	0	1	1	2	1	3	0	1	1	1	1	1	3	1	8	1	5	4	1	1	5	2	5	5	4	1	1	1	5	1	5	5	5	5	5	1	1	5	5	5	5	5	5	5	5	5	5	5	1
1	0	1	1	2	1	3	0	1	2	1	2	4	1	1	5	1	1	5	1	5	1	1	1	1	1	1	1	1	1	1	1	1	1	1	1	1	1	1	1	1	1	1	1	1	1	1	1	1	1
1	0	1	1	2	0	2	0	4	1	1	4	2	4	1	9	1	1	1	1	1	1	1	1	1	1	1	1	1	1	1	1	1	1	1	1	1	1	1	1	1	1	1	1	1	1	1	1	1	1
1	0	1	1	2	0	3	0	3	1	1	1	1	1	1	18	1	1	1	1	1	1	1	1	1	1	1	1	1	1	1	1	1	1	1	1	1	1	1	1	1	1	1	1	1	1	1	1	1	1
1	0	1	1	1	1	2	1	3	1	1	1	1	1	1	5	1	1	1	1	1	1	1	1	1	1	1	1	1	1	1	1	1	1	1	1	1	1	1	1	1	1	1	1	1	1	1	1	1	1
1	0	1	1	1	1	3	0	4	2	1	1	1	1	1	0	1	1	1	1	1	1	1	1	1	1	1	1	1	1	1	1	1	1	1	1	1	1	1	1	1	1	1	1	1	1	1	1	1	1
1	0	1	1	1	1	3	0	2	2	1	1	1	1	1	7	1	1	1	1	1	1	1	1	1	1	1	1	1	1	1	1	1	1	1	1	5	1	1	1	1	1	1	1	1	1	1	1	1	1
1	0	1	1	2	1	2	0	4	1	1	1	1	1	1	10	1	1	1	1	1	1	1	1	1	4	4	4	4	4	2	1	1	1	2	2	1	2	1	1	1	1	1	1	1	1	2	1	1	1
1	0	1	1	2	1	2	0	4	1	1	1	2	1	1	5	2	1	1	1	1	2	2	1	2	1	2	4	1	2	1	1	1	1	1	1	2	1	1	1	1	1	1	2	2	1	1	1	1	1
1	0	1	1	2	1	3	0	4	2	1	1	2	2	2	0	1	1	1	2	2	1	2	1	1	1	2	1	1	1	1	1	1	1	1	1	1	1	1	1	1	1	1	2	1	2	1	1	1	1
1	0	1	1	1	1	3	0	3	1	2	1	3	1	3	0	1	1	1	1	1	1	1	1	1	1	1	1	1	1	1	1	1	1	1	1	1	1	1	1	1	1	1	1	1	1	1	1	1	1
1	0	1	1	1	1	3	0	2	1	1	1	1	4	1	7	4	4	1	1	1	2	2	1	4	4	1	5	1	5	1	5	2	5	5	1	5	1	1	1	1	1	1	5	5	5	1	1	1	1
1	0	1	1	1	1	3	0	3	2	1	1	1	1	1	8	2	1	1	1	1	1	1	1	1	1	1	1	1	1	1	1	1	1	1	1	1	1	1	1	1	1	1	1	1	1	1	1	1	1
1	0	1	1	1	1	3	0	4	1	1	1	1	1	1	5	2	2	1	1	4	2	2	1	4	1	4	5	4	1	2	4	2	1	1	1	5	1	1	1	1	2	2	2	3	2	1	1	1	1
1	0	1	1	1	1	3	0	3	1	1	1	1	1	1	0	1	1	1	1	1	1	1	1	1	1	1	1	1	1	1	1	1	1	1	1	1	1	1	1	1	1	1	1	1	1	1	1	1	1
1	0	1	1	1	1	3	0	2	1	1	1	2	2	2	5	1	1	1	1	1	1	1	1	1	1	1	1	1	1	1	1	1	1	1	1	1	1	1	1	1	1	1	1	1	1	1	1	1	1
1	0	1	1	1	1	3	0	4	2	1	1	1	3	1	6	1	1	1	1	1	1	1	1	1	1	1	5	1	1	1	1	1	1	1	1	1	1	1	1	1	1	1	1	1	1	1	1	1	1
1	0	1	1	1	1	3	0	2	3	1	1	1	1	1	5	1	1	1	1	2	1	1	1	1	1	1	1	1	1	1	1	1	1	1	1	1	1	1	1	1	1	1	1	1	1	1	1	1	1
1	0	1	1	1	1	3	0	3	2	1	1	1	1	1	5	1	2	1	1	1	2	2	1	2	1	1	2	1	2	1	1	1	1	1	1	1	2	2	1	1	1	1	1	2	1	1	1	1	1
1	0	1	1	1	0	3	0	1	3	1	1	1	1	4	7	3	3	5	1	5	2	5	5	5	5	2	2	3	5	5	5	5	5	2	5	3	3	5	5	3	3	5	5	3	3	5	4	4	1
1	0	1	1	2	1	2	0	3	1	1	1	1	1	1	5	1	1	1	1	5	1	1	1	1	1	1	5	1	1	1	1	1	1	1	1	1	5	1	1	1	1	1	1	1	1	1	1	1	1
1	0	1	1	2	1	3	0	4	3	1	2	1	1	1	10	1	1	1	1	1	4	1	5	4	4	4	4	4	1	1	1	1	1	1	1	1	1	1	1	1	1	1	1	1	1	1	1	1	1
1	0	1	1	2	1	3	0	4	1	1	1	1	1	1	7	1	1	1	1	1	1	1	1	1	1	1	1	1	1	1	1	1	1	1	1	1	1	1	1	1	1	1	1	1	1	1	1	1	1
1	0	1	1	2	1	3	0	3	2	1	1	2	1	1	6	5	5	1	1	3	1	1	1	1	1	1	1	1	1	1	1	1	1	1	3	1	4	1	1	1	1	1	3	1	1	1	3	3	1
1	0	1	1	2	1	3	0	4	1	1	1	1	1	2	5	5	1	1	2	1	1	2	4	2	1	2	3	1	3	1	1	1	1	1	1	1	1	1	1	1	1	1	1	1	1	1	1	1	1
1	0	1	1	2	0	3	0	1	1	1	4	1	4	1	6	1	1	1	1	4	1	1	1	1	1	1	1	1	1	1	1	1	1	1	1	1	1	1	1	1	1	1	1	1	1	1	1	1	1
1	0	1	3	1	1	3	0	4	1	1	1	1	1	1	7	1	1	1	1	1	1	1	1	1	1	1	1	1	1	1	1	1	1	1	1	1	1	1	1	1	1	1	1	1	1	1	1	1	1
1	0	1	1	1	1	2	1	3	1	1	2	1	2	1	6	1	1	1	1	1	1	1	1	1	1	1	1	1	1	1	1	1	1	1	1	1	1	1	1	1	1	1	1	1	1	1	1	1	1
1	0	1	1	2	1	2	1	0	1	1	1	1	1	1	0	1	2	1	1	1	1	1	1	1	1	1	1	1	1	1	1	1	1	1	1	1	1	1	1	1	1	1	1	1	1	1	1	1	1
1	0	1	1	2	1	3	0	2	1	3	1	1	4	1	8	1	1	1	1	2	1	1	1	1	1	1	1	1	1	1	1	1	1	1	1	1	1	1	1	1	1	1	1	1	1	1	1	1	1
1	0	1	1	2	1	3	0	3	2	3	2	3	3	1	8	3	2	5	4	3	5	4	3	2	4	3	2	3	3	1	4	4	1	3	2	4	1	1	1	3	1	2	1	4	4	5	5	5	3
1	0	1	1	1	1	3	0	1	2	1	1	1	1	1	5	1	1	1	1	1	1	1	1	1	1	1	1	1	1	1	1	1	1	1	1	1	1	1	1	1	1	1	1	1	1	1	1	1	1
1	0	1	1	1	1	3	0	4	2	1	1	2	1	1	5	1	1	1	1	1	1	1	1	1	1	1	1	1	1	1	1	1	1	1	1	1	1	1	1	1	1	1	1	1	1	1	1	1	1
1	0	1	2	1	1	2	1	3	1	1	3	1	1	1	7	1	1	1	1	1	1	1	1	1	1	1	1	1	1	1	1	1	1	1	1	1	1	1	1	1	1	1	1	1	1	1	1	1	1
1	0	1	1	1	1	3	0	2	1	1	1	1	1	1	8	1	1	1	1	1	1	1	1	1	1	1	1	1	1	1	1	1	1	1	1	1	1	1	1	1	1	1	1	1	1	1	1	1	1
1	0	1	1	2	1	2	1	2	2	1	1	2	1	1	6	1	1	1	1	1	1	1	1	1	1	1	1	1	1	1	1	1	1	1	1	1	1	1	1	1	1	1	1	1	1	1	1	1	1
1	0	1	1	2	1	2	1	3	1	4	1	2	2	1	5	2	1	1	1	1	1	1	1	1	1	1	1	1	1	1	1	1	1	1	1	1	1	1	1	1	1	1	1	1	1	1	1	1	1
1	0	1	1	2	1	3	0	4	2	2	1	2	2	1	5	3	2	1	1	1	1	1	1	1	1	1	1	1	1	1	1	1	1	1	1	1	3	1	1	1	1	1	1	1	1	1	1	1	1
1	0	1	1	2	1	3	0	4	1	1	1	1	1	1	6	1	1	1	1	1	1	1	1	1	1	1	4	1	1	1	1	1	1	1	1	1	1	1	1	1	1	1	3	1	1	1	1	1	1
1	0	1	1	0	0	3	0	4	1	1	1	2	1	1	5	1	1	1	1	1	1	1	1	1	1	1	1	1	1	1	1	1	1	1	1	1	5	1	1	1	1	1	1	1	1	1	1	1	1
1	0	1	1	2	1	3	0	3	1	1	1	1	1	1	8	1	1	1	1	2	1	1	1	1	1	2	4	1	1	1	1	1	1	1	1	1	1	1	1	1	1	1	1	1	1	1	1	2	1
1	0	1	1	2	0	3	0	1	2	4	1	1	1	1	7	4	4	1	1	2	3	1	3	2	4	2	4	5	5	4	2	1	3	5	3	2	1	4	4	3	1	1	2	5	4	3	3	2	5
1	0	1	1	2	0	3	0	0	1	1	1	1	1	1	7	1	1	1	1	1	1	1	1	1	1	1	1	1	1	1	1	1	1	1	1	1	1	1	1	1	1	1	1	1	1	1	1	1	1
1	0	1	1	1	1	3	0	3	1	1	1	1	1	1	0	1	1	1	1	1	1	1	1	1	1	1	1	1	1	1	1	1	1	1	1	1	1	1	1	1	1	1	1	1	1	1	1	1	1
1	0	1	1	1	1	3	0	2	3	1	1	2	2	2	8	2	2	1	1	1	1	2	1	1	1	1	1	1	1	1	1	1	1	1	1	1	1	1	1	1	1	1	1	1	1	1	1	1	1
1	0	1	1	2	1	2	1	4	1	1	1	2	4	1	4	1	1	1	1	1	1	1	1	1	1	1	1	1	1	2	1	1	1	1	5	2	1	1	1	1	1	1	2	1	1	1	1	1	1
1	0	1	1	1	1	3	0	3	2	1	1	1	1	1	30	1	1	1	2	1	1	1	1	1	1	1	1	1	5	5	5	2	1	1	1	1	1	1	1	1	1	1	1	1	1	1	1	1	1
1	0	1	1	2	1	2	1	4	1	1	1	1	1	1	5	1	1	1	1	3	1	1	1	1	1	1	4	1	1	1	1	1	1	1	1	1	1	1	1	1	1	1	1	1	1	1	1	1	1
1	0	1	1	1	1	3	0	3	1	1	1	2	1	1	3	1	1	1	1	3	1	1	1	1	1	1	1	1	1	1	1	1	1	1	1	1	1	1	1	1	1	1	1	1	1	1	1	1	1
1	0	1	1	2	1	3	0	4	1	1	1	1	1	1	4	1	1	1	1	1	1	1	1	1	1	1	1	1	1	1	1	1	1	1	1	1	1	1	1	1	1	1	1	1	1	1	1	1	1
1	0	1	1	1	1	2	0	2	3	1	1	1	1	1	4	5	1	1	1	1	1	1	1	1	1	1	1	1	1	1	1	1	1	1	1	1	1	1	1	1	1	1	1	4	4	1	1	1	1
1	0	1	1	1	0	2	1	3	1	1	1	1	1	1	5	1	1	1	1	2	1	2	1	1	1	1	1	1	1	2	1	1	1	1	1	1	1	1	1	1	1	1	1	1	1	1	1	1	1
1	0	1	1	2	1	3	0	3	2	1	1	1	1	1	9	1	3	1	5	1	1	1	1	1	1	1	1	1	1	1	1	1	1	1	1	1	1	1	1	1	1	1	1	1	1	1	1	1	1
1	0	1	1	1	1	3	0	4	2	1	1	2	2	2	3	1	1	1	5	1	1	5	1	1	4	1	1	1	1	1	1	1	1	1	1	1	2	1	1	1	1	1	1	1	1	1	1	1	1
1	0	1	1	2	1	2	1	4	2	1	2	1	1	1	8	1	1	1	3	1	1	1	1	1	1	1	1	1	3	1	1	1	1	1	1	1	5	4	1	1	1	1	2	1	1	3	4	4	1
1	0	2	1	1	1	3	0	0	2	2	1	1	1	2	9	4	4	4	1	1	4	4	4	4	4	4	4	4	4	4	4	4	4	4	4	4	4	4	1	1	4	4	5	5	5	5	5	5	1
1	0	2	1	2	1	3	0	2	1	1	1	2	1	1	8	5	5	1	1	1	5	1	3	5	1	1	5	5	5	5	1	1	5	1	3	1	5	1	1	1	5	1	5	5	5	5	5	5	5
1	0	2	1	1	1	3	0	2	1	1	1	1	1	2	5	1	1	1	1	1	1	1	1	1	1	1	1	1	1	1	1	1	1	1	1	1	1	1	1	1	1	1	1	1	1	1	1	1	1
1	0	2	1	1	1	3	0	4	1	1	1	1	1	1	6	1	1	1	1	1	1	1	1	1	1	1	1	1	1	1	1	1	1	1	1	1	1	1	1	1	1	1	1	1	1	1	1	1	1
1	0	2	1	2	1	3	0	3	1	2	3	3	4	1	6	1	1	1	1	1	1	1	1	1	1	1	1	1	1	1	1	1	1	1	1	1	1	1	1	1	1	1	1	1	1	1	1	1	1
1	0	2	1	1	1	2	1	3	1	1	1	1	1	1	6	2	2	1	1	1	2	1	1	1	2	2	2	4	1	1	4	2	1	3	1	3	1	2	1	1	1	3	4	3	1	1	1	2	1
1	0	2	1	1	1	3	0	4	4	4	4	1	1	4	6	1	5	1	1	1	1	5	5	1	1	1	1	1	5	1	5	5	1	5	1	1	1	1	1	1	1	1	1	1	1	1	1	1	1
1	0	2	1	1	1	3	0	3	1	1	2	1	1	1	13	1	1	1	1	1	1	1	1	1	1	1	1	1	1	1	1	1	1	1	1	1	1	1	1	1	1	1	1	1	1	1	1	1	1
1	0	2	1	1	1	3	0	3	2	1	1	4	4	1	0	1	1	1	1	1	1	1	4	1	1	4	1	4	4	1	1	1	4	1	4	1	4	1	1	1	1	1	1	1	1	1	1	1	1
1	0	2	1	1	1	3	0	3	1	1	1	1	1	1	5	1	1	1	1	1	1	1	1	1	1	1	1	1	1	1	1	1	1	1	1	1	1	1	1	1	1	1	1	1	1	1	1	1	1
1	0	2	1	1	0	3	0	3	4	1	2	4	2	1	7	1	1	1	1	1	1	1	1	1	1	1	1	1	1	1	1	1	1	1	1	1	1	1	1	1	1	1	1	1	1	1	1	1	1
1	0	2	1	2	1	2	0	3	3	1	1	1	1	1	7	1	1	1	1	1	1	1	1	1	1	1	1	1	1	1	1	1	1	1	1	1	1	1	1	1	1	1	1	1	1	1	1	1	1
1	0	2	1	2	1	3	0	1	2	3	1	1	2	3	5	1	1	1	1	1	1	2	1	1	1	1	1	1	1	1	1	1	1	1	1	1	1	1	1	1	1	1	1	1	1	1	1	1	1
1	0	2	1	2	1	3	0	1	2	3	1	2	3	4	0	1	3	1	3	4	1	3	2	4	5	2	4	2	1	5	3	1	5	3	1	2	5	3	1	2	5	3	4	2	3	5	1	3	4
1	0	2	1	2	0	3	0	2	1	1	3	1	2	1	8	1	1	1	1	1	1	1	1	1	1	1	1	1	2	1	2	1	1	1	1	1	1	1	1	1	1	1	1	1	1	1	1	1	1
1	0	2	1	1	1	3	0	3	1	1	1	1	1	2	9	1	1	1	4	4	4	4	1	1	4	1	4	1	1	1	4	4	4	1	1	1	1	1	1	1	1	1	1	1	1	1	1	1	1
1	0	2	1	1	1	3	0	2	1	1	2	3	1	1	6	1	1	1	1	1	1	1	1	1	1	1	1	1	1	1	1	1	1	1	1	1	1	1	1	1	1	1	1	1	1	1	1	1	1
1	0	2	1	1	1	3	0	2	3	4	3	4	2	1	1	1	1	1	1	1	1	1	1	1	1	1	1	1	1	1	1	1	1	1	1	1	1	1	1	1	1	1	1	1	1	1	1	1	1
1	0	2	1	2	1	2	1	4	1	1	1	1	3	1	8	1	4	1	1	1	3	1	4	1	1	4	4	4	1	4	1	4	1	1	4	4	1	4	1	1	1	1	4	4	4	1	1	4	1
1	0	2	1	2	1	2	0	1	2	2	2	2	2	1	30	3	3	2	1	1	1	1	1	1	1	1	1	1	1	1	1	1	1	1	1	1	1	1	1	1	1	1	1	1	1	1	1	1	1
1	0	2	2	1	1	3	0	2	2	1	1	2	3	2	5	1	1	1	1	1	4	4	4	1	4	1	4	1	4	1	4	1	4	4	2	4	2	1	1	1	1	1	4	4	4	4	4	4	4
1	0	2	2	1	0	3	0	3	2	2	1	1	1	1	7	1	1	1	1	1	1	1	1	1	1	1	1	1	1	1	1	1	1	1	1	1	1	1	1	1	1	1	1	1	1	1	1	1	1
1	0	2	1	2	1	2	1	2	1	1	1	1	1	1	8	1	1	1	1	1	5	5	5	1	1	1	5	3	5	5	1	2	1	1	1	1	2	1	1	1	3	1	1	1	1	1	3	5	1
1	0	2	1	1	1	3	0	4	2	1	1	1	2	1	6	1	1	1	1	3	1	1	1	1	1	1	1	3	1	3	1	1	3	1	4	1	1	1	1	1	1	1	1	1	1	3	3	3	3
1	0	2	1	2	1	3	0	4	2	1	1	2	1	1	7	1	1	1	1	1	1	1	1	1	1	1	1	1	1	1	1	1	1	1	1	1	1	1	1	1	1	1	5	1	1	1	1	1	1
1	0	2	1	1	0	3	0	2	3	1	4	4	1	1	7	1	1	1	1	1	1	1	1	1	1	1	1	1	1	1	1	1	1	1	1	1	1	1	1	1	1	1	1	1	1	1	1	1	1
1	0	2	1	2	1	3	0	2	1	1	1	1	1	1	8	1	1	1	2	1	1	1	1	1	1	1	1	1	1	5	1	1	1	1	1	1	1	1	1	1	1	1	1	1	5	1	1	1	1
1	0	3	1	1	1	2	1	2	1	2	2	3	3	2	6	5	1	1	1	1	1	1	1	1	1	1	5	1	1	1	1	1	1	1	1	1	1	1	1	1	1	1	1	1	1	1	1	1	1
1	0	3	1	1	1	3	0	4	4	1	1	1	1	1	5	1	1	1	1	4	1	1	1	1	1	4	1	1	4	1	1	1	1	1	1	1	1	1	1	1	1	1	1	1	1	1	1	1	1
1	0	3	1	1	1	3	0	2	1	1	1	3	1	1	6	1	1	1	1	1	1	1	1	1	1	1	1	1	1	1	1	1	1	1	1	1	1	1	1	1	1	1	1	1	1	1	1	1	1
1	0	3	1	1	0	3	0	3	1	1	2	1	2	1	6	1	1	1	2	1	1	1	1	1	1	1	1	1	1	1	1	1	1	1	1	1	1	1	1	1	1	1	1	1	1	1	1	1	1
1	0	3	1	1	1	3	0	4	1	1	1	1	1	1	0	1	1	1	1	1	1	1	1	1	1	1	1	1	1	1	1	1	1	1	1	1	1	1	1	1	1	1	1	1	1	1	1	1	1
1	0	3	1	1	1	3	0	0	1	1	1	1	1	1	5	1	1	5	1	1	1	1	1	1	1	1	1	1	1	1	1	1	1	1	1	1	1	1	1	1	1	1	1	1	1	1	1	1	1
1	0	3	1	1	0	3	0	3	3	1	1	1	1	1	7	2	2	1	1	1	3	4	1	1	3	1	1	1	1	1	1	5	1	1	1	1	1	5	1	1	5	1	1	1	1	1	1	1	1
1	0	3	1	1	1	3	0	1	1	1	1	1	1	1	10	1	1	1	1	1	1	1	1	1	1	1	1	1	1	1	1	1	1	1	1	1	1	1	1	1	1	1	1	1	1	1	1	1	1
1	0	3	1	1	1	3	0	3	1	1	1	1	1	1	15	1	1	1	1	1	1	1	1	1	1	1	1	1	1	1	1	1	1	1	1	1	1	1	1	1	1	1	1	1	1	1	1	1	1
1	0	3	1	1	0	3	0	3	2	1	2	1	3	4	0	1	1	1	1	1	1	1	1	1	1	1	1	1	1	1	1	1	1	1	1	1	1	1	1	1	1	1	1	1	1	1	1	1	1
1	0	3	1	2	0	3	0	2	2	3	1	4	1	1	9	1	1	1	1	4	1	1	1	2	3	1	1	1	1	1	1	1	1	1	1	1	1	1	1	1	1	1	1	1	1	1	1	1	1
1	0	3	1	1	1	3	0	3	1	1	1	1	1	1	6	1	1	1	1	1	1	1	1	1	1	1	1	1	1	1	1	1	1	1	1	1	1	1	1	1	1	1	1	1	1	1	1	1	1
1	0	4	1	1	1	3	0	2	1	1	1	1	1	1	8	1	1	1	1	1	1	1	1	1	1	1	1	1	1	1	1	1	1	1	1	1	1	1	1	1	1	1	1	1	1	1	1	1	1
1	0	4	1	1	0	3	0	1	1	1	1	1	1	1	7	2	1	1	1	1	1	1	1	2	2	4	1	1	4	4	2	3	1	1	4	1	1	2	1	1	1	3	1	1	1	1	1	1	1
1	0	4	1	1	1	3	0	1	1	1	1	1	1	2	8	1	1	1	1	1	1	1	1	1	1	1	1	1	1	1	1	1	1	1	1	1	4	1	1	1	1	1	3	2	4	3	1	1	1
1	0	0	1	1	1	2	0	3	1	1	2	1	1	1	9	2	1	1	1	1	1	1	1	1	1	1	1	1	1	1	1	1	1	1	1	1	1	1	1	1	1	1	1	1	1	1	1	1	1
1	0	1	1	0	0	3	0	2	1	1	1	1	1	1	6	1	1	1	1	1	1	1	1	1	1	1	1	1	1	1	1	1	1	1	1	1	1	1	1	1	1	1	1	1	1	1	1	1	1
1	1	2	1	2	0	3	0	3	1	1	2	2	1	1	8	1	1	1	1	1	1	1	1	1	1	1	1	1	1	1	1	1	1	1	1	1	1	1	1	1	1	1	1	1	1	1	1	1	1
1	1	2	1	2	1	2	1	3	2	3	1	2	2	1	6	2	2	1	1	4	1	1	1	1	1	2	4	4	1	3	1	1	1	1	1	1	3	2	1	1	1	1	1	1	2	1	2	1	1
1	1	2	1	2	1	2	1	4	1	1	2	2	1	1	8	3	1	1	3	3	5	3	1	3	1	5	2	1	2	3	5	1	1	2	1	1	1	1	1	5	1	1	1	3	3	3	3	1	1
1	1	1	1	2	1	2	1	3	1	2	1	1	1	1	5	1	1	1	1	1	1	1	1	1	1	1	2	1	1	1	1	1	1	1	1	1	1	1	1	1	1	1	1	1	1	1	1	1	1
1	1	1	1	1	1	3	0	2	1	1	1	1	1	1	0	1	1	1	1	1	1	1	1	1	1	1	1	1	1	1	1	1	1	1	1	1	1	1	1	1	1	1	1	1	1	1	1	1	1
1	1	1	1	2	0	3	0	4	1	1	2	1	2	1	7	1	1	1	4	1	1	1	1	1	1	1	1	1	1	1	1	1	1	1	1	1	1	1	1	1	1	1	1	1	1	1	1	1	1
1	1	1	1	1	1	3	0	4	1	1	4	4	4	3	8	1	1	1	1	1	1	1	1	1	1	1	1	1	1	1	1	1	1	1	1	1	1	1	1	1	1	1	1	1	1	1	1	1	1
1	1	1	1	0	0	3	0	2	4	2	1	3	4	3	6	1	1	1	1	1	1	1	1	1	1	1	1	1	1	1	1	1	1	1	1	1	1	1	1	1	1	1	1	1	1	1	1	1	1
1	1	2	1	0	0	3	0	3	1	1	1	1	1	1	0	1	1	1	1	1	1	1	1	1	1	1	1	1	1	1	1	1	1	1	1	1	1	1	1	1	1	1	1	1	1	1	1	1	1
1	1	2	1	2	1	3	0	2	1	1	1	2	2	1	6	2	2	1	1	3	1	1	1	1	3	1	1	3	1	1	1	2	4	1	1	1	1	1	4	1	1	1	1	4	4	1	1	1	1
1	1	2	1	1	1	2	1	3	2	1	2	2	1	1	7	4	4	1	1	1	1	1	1	1	1	1	1	1	1	1	1	1	1	1	1	1	1	1	1	1	1	1	1	1	1	1	1	1	1
1	1	2	1	2	1	3	0	1	1	1	1	2	1	3	3	1	1	1	1	1	1	1	1	1	1	1	1	1	1	1	1	1	1	1	1	1	1	1	1	1	1	1	1	1	1	1	1	1	1
1	1	2	1	1	1	3	0	2	1	1	1	1	1	1	6	1	1	1	2	4	1	1	1	1	1	1	4	4	1	1	1	1	4	1	1	1	1	4	1	1	1	1	1	1	1	1	1	1	1
1	1	2	1	1	0	3	0	3	1	3	1	4	2	1	5	1	1	1	1	1	1	1	1	1	1	1	1	1	1	1	1	1	1	1	1	1	1	1	1	1	1	1	1	1	1	1	1	1	1
1	1	2	1	2	1	3	0	0	4	4	4	4	4	4	30	2	5	5	1	2	2	4	2	3	5	5	5	5	5	3	1	1	3	3	1	3	3	3	1	3	3	1	3	3	5	5	1	1	1
1	1	2	3	1	0	3	0	2	2	1	1	1	1	1	0	1	1	1	1	1	1	1	1	1	1	1	1	1	1	1	1	1	1	1	1	1	1	1	1	1	1	1	1	1	1	1	1	1	1
1	1	2	1	1	1	2	1	4	1	1	1	1	1	1	6	1	1	1	1	2	1	1	1	1	1	1	1	1	1	1	1	1	1	1	1	1	1	1	1	1	1	1	1	1	1	1	1	1	1
1	1	2	1	2	1	3	0	3	1	1	1	1	1	1	5	2	1	1	1	5	2	1	2	2	1	1	4	1	2	1	2	1	2	1	2	1	1	5	1	1	1	1	2	3	2	1	1	2	2
1	1	2	1	2	1	1	1	3	1	1	1	2	1	2	7	1	1	4	1	3	1	3	1	1	4	3	3	1	1	1	4	3	4	1	2	4	1	5	5	3	3	3	4	3	2	3	5	1	5
1	1	2	1	1	1	3	0	4	1	2	1	2	1	1	5	1	1	1	1	1	1	1	1	1	1	1	4	1	1	1	1	1	1	1	1	1	1	1	1	1	1	1	1	1	1	1	1	1	1
1	1	2	1	1	1	3	0	2	1	1	2	1	1	1	5	1	1	1	1	1	1	1	1	1	1	1	1	1	1	1	1	1	1	1	1	1	1	1	1	1	1	1	1	1	1	1	1	1	1
1	1	2	1	1	1	3	0	4	1	1	1	1	1	1	9	1	1	1	1	1	1	1	1	1	1	1	1	1	1	1	1	1	1	1	1	1	1	1	1	1	1	1	1	1	1	1	1	1	1
1	1	2	1	1	1	3	0	1	2	2	2	2	2	2	8	3	3	3	3	3	3	3	3	3	3	3	3	3	3	3	3	3	3	3	3	3	1	1	1	1	1	3	3	3	3	3	3	3	3
1	1	2	1	1	1	3	0	2	1	1	1	1	1	1	0	1	1	1	1	2	1	1	1	1	1	1	1	1	2	1	1	1	1	1	1	1	3	1	1	1	1	1	1	1	1	1	1	1	1
1	1	2	1	2	1	3	0	4	1	2	1	1	1	1	8	1	1	1	2	1	1	1	1	1	1	1	1	1	1	1	1	1	1	1	1	1	1	1	1	1	1	1	2	1	1	1	1	1	1
1	1	2	1	2	1	3	0	2	1	1	2	3	4	1	11	1	1	1	1	1	1	1	1	1	1	1	1	1	1	1	1	1	1	1	1	1	1	1	1	1	1	1	1	1	1	1	1	1	1
1	1	2	1	2	0	2	0	2	1	1	1	1	1	1	4	1	1	1	1	4	1	1	1	1	1	1	4	1	1	1	1	1	1	1	1	1	1	1	1	1	1	1	1	1	1	1	1	1	1
1	1	2	1	1	1	3	0	3	1	1	1	1	1	1	0	1	1	1	1	1	1	1	1	1	1	1	1	1	1	1	1	1	1	1	1	1	1	1	1	1	1	1	1	1	1	1	1	1	1
1	1	2	1	1	1	3	0	4	1	1	1	1	1	1	0	5	5	4	1	5	5	4	4	5	5	1	1	1	1	1	5	5	5	5	1	1	1	5	4	3	5	5	5	5	5	5	5	5	1
1	1	2	1	1	0	3	0	1	1	3	1	4	4	2	20	5	1	1	1	1	1	2	1	4	2	5	5	1	1	5	1	1	1	1	1	1	5	1	1	1	1	1	2	2	1	1	1	2	1
1	1	2	1	1	1	3	0	4	1	1	2	1	1	1	0	1	5	1	3	1	1	3	1	3	5	5	5	1	1	1	1	1	1	1	1	1	1	1	1	1	1	1	3	3	1	1	1	1	1
1	1	2	1	1	1	3	0	2	2	2	1	2	3	2	5	3	1	1	1	1	1	2	1	1	1	1	5	2	1	1	1	1	1	1	1	1	1	1	1	1	1	1	3	1	1	1	1	1	1
1	1	2	1	1	1	3	0	2	1	1	1	2	4	1	1	4	4	1	4	1	1	1	1	4	1	1	1	4	1	1	1	1	1	1	3	1	5	1	1	1	1	1	1	1	1	1	1	1	1
1	1	2	1	2	1	3	0	3	1	1	1	1	1	1	5	1	1	1	1	1	1	1	1	1	2	1	1	1	4	2	2	1	2	1	4	1	4	1	1	1	1	1	4	4	1	4	4	1	1
1	1	2	1	2	0	3	0	0	1	1	1	2	3	2	9	1	1	1	1	3	3	3	2	3	1	1	1	1	1	1	1	1	1	1	1	1	1	1	1	1	1	1	1	1	1	1	1	1	1
1	1	2	2	1	1	3	0	3	1	2	1	3	1	1	0	1	1	1	1	1	1	1	1	1	1	1	1	1	1	1	1	1	1	1	1	1	1	1	1	1	1	1	2	1	1	1	1	1	1
1	1	2	1	1	1	3	0	1	1	3	4	3	1	3	8	1	1	1	1	5	1	2	1	1	1	5	1	1	1	1	1	1	1	1	1	1	5	1	1	1	1	1	3	2	1	1	1	1	1
1	1	2	1	2	0	3	0	2	2	1	1	1	2	2	5	2	2	1	3	1	1	1	1	1	1	1	1	1	1	1	1	1	1	1	1	1	1	1	1	1	1	1	1	1	1	1	1	1	1
1	1	2	1	0	0	3	0	3	1	1	1	1	1	1	7	1	1	1	1	1	1	1	1	1	1	1	1	1	1	1	1	1	1	1	1	1	1	1	1	1	1	1	1	1	1	1	1	1	1
1	1	2	1	2	1	3	0	1	3	3	2	1	1	1	15	1	1	1	2	1	1	2	1	1	1	1	1	1	1	2	1	3	1	2	1	2	1	1	1	1	1	1	2	1	1	2	1	1	2
1	1	2	1	2	1	3	0	1	1	3	2	2	3	2	5	1	1	1	5	1	3	1	5	5	5	4	5	5	1	5	1	2	1	3	5	1	1	1	1	3	1	4	1	1	1	1	1	1	5
1	1	2	1	2	1	3	0	1	1	3	2	2	3	2	5	1	1	1	5	1	3	1	5	5	5	4	5	5	1	5	1	2	1	3	5	1	1	1	1	3	1	4	1	1	1	1	1	1	5
1	1	2	1	2	1	2	1	1	1	1	1	1	1	1	5	3	4	1	1	1	3	1	3	2	4	2	3	2	3	1	4	4	3	1	1	1	1	2	1	1	1	1	1	2	3	3	1	1	1
1	1	2	1	2	1	3	0	4	2	1	1	1	2	1	6	4	1	1	1	1	1	1	1	1	1	1	1	1	1	1	1	1	1	1	1	1	1	1	1	1	1	1	1	1	1	1	1	1	1
1	1	2	1	2	1	3	0	4	4	1	1	1	1	1	4	1	1	1	1	1	1	1	1	1	1	1	1	1	1	1	1	1	1	1	1	1	1	1	1	1	1	1	1	1	1	1	1	1	1
1	1	2	1	2	1	3	0	3	4	4	4	4	4	3	6	5	3	1	2	1	2	2	5	4	2	5	5	5	5	4	2	2	2	2	3	5	1	2	1	5	5	2	5	2	2	1	4	1	3
1	1	3	1	2	1	3	0	0	1	1	1	2	3	1	13	5	1	1	1	1	1	1	1	4	1	1	5	1	1	1	1	1	1	1	1	1	4	1	1	1	1	1	5	5	1	1	1	1	1
1	1	3	1	1	1	3	0	2	1	1	1	1	1	1	5	3	3	1	1	1	1	2	1	1	1	1	1	1	1	1	1	1	1	1	1	1	1	1	1	1	1	1	2	1	1	1	1	1	1
1	1	3	1	1	0	3	0	3	1	1	2	2	2	1	8	2	1	1	3	3	3	2	2	5	3	1	3	2	5	5	3	5	1	1	1	1	1	1	1	5	1	5	1	1	1	1	1	1	1
1	1	3	1	2	1	3	0	4	4	1	2	3	1	1	4	4	1	2	5	1	1	4	4	4	4	4	4	1	4	4	1	1	4	4	1	4	2	4	4	4	4	1	1	1	1	1	1	1	1
1	1	3	1	1	1	3	0	2	1	1	1	1	1	1	7	1	1	1	1	1	1	1	1	1	1	1	1	1	1	1	1	1	1	1	1	1	1	1	1	1	1	1	1	1	1	1	1	1	1
1	1	3	1	2	1	3	0	2	1	1	1	1	1	1	7	1	1	1	5	5	1	1	1	1	1	1	1	1	1	1	1	1	1	1	1	1	1	1	1	1	1	1	1	1	1	1	1	1	1
1	1	3	1	2	0	3	0	2	2	2	3	1	2	2	9	1	1	1	1	4	2	5	2	1	1	1	1	1	5	5	5	3	3	3	1	3	3	5	5	5	1	3	1	5	5	1	5	5	1
1	1	3	1	2	0	3	0	1	1	1	1	1	1	1	13	2	1	1	1	2	2	2	1	1	1	1	5	1	1	1	3	2	2	5	1	1	1	1	1	1	1	1	5	2	1	1	1	1	1
1	1	3	1	1	1	3	0	2	1	1	1	1	1	1	10	1	1	1	1	1	5	1	1	1	1	1	1	1	1	1	1	1	1	1	1	1	1	1	1	1	1	1	1	1	1	1	1	1	1
1	1	3	1	1	0	3	0	1	1	1	1	1	1	1	6	2	2	2	2	2	2	2	2	2	2	3	3	5	5	5	5	5	3	5	5	5	5	5	5	5	1	1	1	1	1	1	1	1	1
1	1	3	1	2	1	3	0	2	3	1	1	3	1	2	7	3	5	2	1	2	4	3	3	1	1	4	1	1	5	2	4	2	2	1	3	5	3	5	4	2	5	3	5	3	4	5	3	5	1
1	2	0	1	2	1	2	1	3	2	1	1	2	1	1	10	1	2	1	1	1	1	1	1	1	1	1	1	1	1	1	1	1	1	1	1	1	1	1	1	1	1	1	1	1	1	1	1	1	1
1	2	4	1	2	0	2	0	3	3	1	1	1	1	1	4	1	5	1	1	1	1	1	1	1	5	5	1	1	1	1	1	1	1	1	1	1	2	2	4	1	1	1	5	4	1	3	1	5	5
1	2	4	1	1	1	3	0	3	4	1	4	4	1	2	8	1	1	1	1	1	1	2	2	1	1	1	1	2	2	1	2	1	1	1	1	1	1	1	1	1	1	1	1	1	1	1	1	1	1
1	2	3	1	1	1	3	0	4	1	1	1	1	1	1	5	1	5	5	3	5	4	5	1	1	1	1	5	1	1	1	1	1	1	1	1	1	3	5	1	1	1	1	2	5	1	5	1	1	1
1	2	3	1	1	0	1	1	4	4	1	1	1	1	1	5	2	1	1	1	1	2	2	1	4	1	4	1	2	1	1	2	3	1	2	1	1	2	1	1	1	4	4	4	4	1	1	1	1	1
1	2	4	1	1	1	3	0	2	1	1	2	4	3	2	7	3	1	1	2	1	3	1	5	3	3	3	2	3	1	4	1	3	3	3	4	3	5	5	1	1	1	1	3	3	1	1	1	3	1
1	2	4	1	2	1	3	0	2	3	3	1	4	3	3	7	5	5	5	5	4	2	3	5	4	3	4	1	5	4	2	5	2	5	3	5	2	1	4	2	2	4	4	5	3	5	5	5	5	1
1	2	4	1	1	1	2	1	3	1	1	1	1	1	1	5	1	1	1	1	1	1	1	1	1	1	1	1	1	1	1	1	1	1	1	1	1	1	5	1	1	1	1	1	1	1	1	1	1	1
1	2	4	1	1	1	3	0	2	1	1	1	4	3	1	3	1	1	1	1	1	1	1	1	1	1	1	1	1	1	1	1	1	1	1	1	1	1	1	1	1	1	1	1	1	1	1	1	1	1
1	2	4	1	1	1	3	0	2	1	1	2	1	1	1	6	1	1	1	1	2	1	1	1	1	1	1	1	1	1	1	1	1	1	1	1	1	1	1	1	1	1	1	1	1	1	1	1	1	1
1	2	4	1	1	0	3	0	3	2	2	1	2	2	3	6	1	1	1	2	5	1	1	1	1	1	1	1	1	1	1	1	1	1	1	1	1	1	1	1	1	1	1	1	1	1	1	1	1	1
1	2	4	1	1	1	3	0	3	2	1	1	2	1	2	9	3	2	2	5	5	2	5	3	1	5	1	1	2	1	4	5	1	1	1	1	1	1	5	1	1	5	1	1	1	5	5	1	1	1
1	2	4	1	1	1	3	0	2	2	1	1	1	1	2	9	4	1	1	1	4	4	4	4	4	4	4	4	4	4	1	5	1	4	1	1	1	4	4	5	1	4	1	1	3	4	4	1	3	1
1	2	4	1	1	1	3	0	4	3	4	3	3	3	3	7	2	1	1	1	1	1	1	1	1	1	1	1	1	1	1	1	1	1	1	1	1	1	1	1	1	1	1	2	2	1	1	1	1	1
1	2	4	1	2	1	3	0	4	2	3	1	3	2	1	5	1	1	1	1	1	1	1	1	1	1	1	1	1	1	1	1	1	1	1	1	1	1	1	1	1	1	1	1	1	1	1	1	1	1
1	2	4	1	2	0	3	0	1	1	1	1	1	1	4	6	3	3	5	1	4	4	1	4	1	1	4	1	4	1	2	2	3	1	2	1	1	1	1	1	4	1	1	2	2	4	1	1	1	1
1	2	4	1	1	1	3	0	3	1	1	1	1	1	1	7	1	1	1	1	1	1	1	1	1	1	1	1	1	1	1	1	1	1	1	1	1	1	1	1	1	1	1	1	1	1	1	1	1	1
1	2	4	1	1	0	3	0	3	3	2	1	2	2	1	7	1	1	1	1	1	1	2	1	1	1	1	1	1	1	1	1	1	1	1	1	1	1	1	1	1	1	1	1	1	1	1	1	1	1
1	2	4	1	1	0	3	0	2	2	2	2	2	2	2	6	1	1	1	1	1	1	1	1	1	1	1	4	1	1	1	1	2	1	1	1	1	2	1	1	1	1	1	1	1	1	1	1	1	1
1	2	4	1	2	1	2	1	1	1	1	3	1	1	1	7	4	1	5	1	1	2	1	1	1	4	1	1	1	1	1	3	1	1	1	1	1	1	1	1	1	1	1	1	1	1	1	1	1	1
1	2	4	1	2	1	3	0	4	3	1	1	1	2	1	5	2	1	1	1	1	1	2	2	1	4	1	2	2	1	2	2	1	4	1	1	1	1	1	1	1	1	1	4	2	2	1	1	1	1
1	2	4	1	2	1	3	0	3	1	1	1	1	2	1	8	1	1	1	1	1	1	1	1	1	1	1	1	1	1	1	1	1	1	1	1	1	1	1	1	1	1	1	1	1	1	1	1	1	1
1	2	4	1	2	0	3	0	3	1	2	1	2	2	2	8	4	5	2	5	1	4	1	2	5	2	2	5	4	2	2	2	2	2	4	1	2	1	2	1	1	2	2	5	4	4	2	2	2	1
1	2	4	1	1	1	3	0	1	1	1	1	1	2	1	7	3	1	4	1	4	2	2	2	4	4	2	3	4	5	4	3	3	4	3	1	2	1	5	5	1	1	4	3	5	5	5	5	4	1
1	2	4	1	2	1	2	1	4	1	1	1	1	1	1	8	1	1	1	1	1	1	1	1	1	1	1	1	1	1	1	1	1	1	1	1	1	1	1	1	1	1	1	1	1	1	1	1	1	1
1	2	4	1	2	1	2	1	4	1	1	1	2	1	1	8	4	4	1	1	1	5	4	5	4	4	4	1	5	1	1	4	1	4	1	1	1	4	3	1	1	4	3	5	5	5	1	1	1	1
1	2	4	1	1	1	2	0	3	1	2	1	2	2	3	7	1	4	1	1	1	1	1	2	4	4	1	5	1	1	4	1	1	1	1	1	5	1	1	1	1	1	1	1	1	1	1	1	1	1
1	2	4	1	1	1	3	0	1	1	1	1	1	2	1	8	5	5	3	3	1	5	3	3	1	1	1	1	1	1	1	1	1	1	1	1	1	1	1	1	1	1	1	1	1	1	1	1	1	1
1	2	4	1	2	1	2	1	4	4	1	3	3	1	1	6	1	1	1	1	1	1	2	1	4	1	2	5	1	1	1	1	1	2	1	1	1	1	1	1	1	1	1	2	1	4	1	5	1	2
1	2	4	1	2	1	2	1	3	2	1	1	3	2	1	5	4	3	1	1	1	3	5	3	1	1	1	1	1	1	1	1	1	1	1	1	1	1	1	1	1	1	1	1	1	1	2	1	2	1
1	2	4	1	2	1	3	0	2	2	1	2	1	2	3	7	1	1	1	1	3	3	2	1	1	1	5	5	2	1	1	1	1	1	1	1	1	1	1	1	1	1	5	5	5	4	5	1	1	1
1	2	4	1	2	1	3	0	3	1	1	1	1	2	1	5	1	1	1	1	1	1	1	3	5	1	4	4	1	1	1	1	1	1	1	1	2	2	1	1	3	1	5	1	1	5	1	1	5	1
1	2	4	1	2	1	3	0	4	1	4	2	1	2	3	5	3	1	5	1	1	1	1	1	1	1	1	1	1	1	5	1	4	5	1	1	1	3	1	1	3	3	3	5	5	5	1	2	1	1
1	2	4	1	1	0	3	0	3	1	3	1	1	1	2	5	1	2	1	1	1	1	1	1	1	1	1	1	1	1	2	1	1	1	1	1	4	1	1	1	1	1	1	1	2	1	1	5	1	1
1	2	4	1	2	1	2	1	3	4	1	1	3	3	4	7	1	4	2	1	2	2	1	1	1	2	3	3	1	1	4	5	4	5	4	3	1	1	1	1	1	1	1	1	1	1	1	1	5	1
1	2	5	1	1	1	3	0	4	1	1	4	1	2	3	6	4	3	5	2	1	1	1	1	1	1	1	1	1	1	1	1	1	1	1	1	1	5	1	1	1	5	1	1	1	1	1	1	1	1
1	2	5	1	1	0	2	1	3	2	2	1	1	1	1	8	1	4	4	1	1	1	1	1	1	1	1	1	4	4	4	1	1	1	1	1	1	1	1	1	1	1	1	1	1	1	1	1	4	1
1	2	5	1	1	0	3	0	3	1	1	2	2	2	1	8	2	3	1	1	1	1	3	3	1	1	2	5	1	1	2	1	1	1	2	1	1	2	1	1	1	1	1	2	2	1	1	1	1	1
1	2	5	1	1	1	3	0	3	1	1	1	1	1	1	9	1	1	1	1	1	1	1	1	1	1	1	1	1	1	1	1	1	1	1	1	1	1	1	1	1	1	1	1	1	1	1	1	1	1
1	2	5	1	1	1	3	0	3	2	1	1	2	1	1	5	2	1	1	3	5	5	5	3	3	1	1	1	3	3	3	1	1	5	1	1	4	1	1	4	1	1	3	5	5	5	2	1	1	1
1	2	5	1	1	1	3	0	4	2	1	1	1	1	1	8	1	1	1	1	1	1	1	1	1	1	1	1	1	1	1	1	1	1	1	1	1	1	1	1	1	1	1	1	1	1	1	1	1	1
1	2	5	1	2	1	2	1	3	2	2	2	3	1	1	4	1	2	1	4	5	1	2	1	3	1	5	1	1	1	2	2	1	2	2	2	2	2	2	1	3	1	1	2	2	1	1	1	2	1
1	2	4	1	1	1	3	0	4	1	2	1	4	1	1	6	1	1	1	1	1	1	1	1	1	1	1	1	1	1	1	1	1	1	1	1	1	1	1	1	1	1	1	1	1	1	1	1	1	1
1	2	4	1	2	1	3	0	3	3	1	1	1	1	1	8	1	1	1	1	1	1	1	1	1	1	1	1	1	1	1	1	1	1	1	1	1	1	1	1	1	1	1	1	1	1	1	1	1	1
1	2	4	1	1	0	2	1	3	2	3	1	2	1	2	4	1	1	3	2	2	4	2	1	5	3	3	2	3	1	1	1	1	1	1	1	1	2	1	1	1	1	1	5	1	1	1	1	1	1
1	3	4	1	1	0	3	0	1	1	1	1	1	1	1	30	1	2	1	1	1	1	1	1	1	1	1	1	1	1	1	1	1	1	1	1	1	1	1	1	1	1	1	1	1	1	1	1	1	1
1	3	3	1	1	1	3	0	1	1	2	1	2	1	2	5	2	3	2	1	1	1	1	1	1	1	1	1	1	1	1	3	1	3	1	1	3	1	1	1	1	3	2	2	3	1	1	1	1	1
1	3	2	1	2	1	3	0	2	1	1	1	1	1	1	8	1	1	1	2	1	1	1	1	1	1	1	1	1	1	1	1	1	1	1	1	1	1	1	1	1	1	1	1	1	1	1	1	1	1
1	3	2	1	2	1	2	1	4	1	3	1	1	1	1	5	1	1	1	1	1	2	2	2	2	4	1	1	1	1	2	1	2	2	1	5	2	1	1	1	1	1	1	1	1	1	1	1	1	1
1	3	2	1	2	1	2	0	2	1	2	1	1	1	1	8	1	1	1	1	1	1	2	1	1	1	1	1	1	1	1	1	5	5	5	1	1	1	5	5	1	5	1	1	1	1	1	1	1	1
1	3	2	1	2	0	3	0	4	1	1	1	1	1	1	6	1	1	1	1	1	1	1	1	1	1	1	5	1	1	1	1	1	1	1	1	1	1	1	1	1	1	1	1	1	1	1	1	1	1
1	3	2	1	1	1	3	0	3	1	1	1	1	1	2	0	1	1	1	1	1	1	1	1	1	1	1	1	1	1	1	1	1	1	1	1	1	1	1	1	1	1	1	1	1	1	1	1	1	1
1	3	2	2	2	1	3	0	1	2	3	4	2	1	1	5	1	1	1	1	1	1	1	4	2	1	5	1	1	1	1	1	1	1	1	1	1	1	1	1	1	1	1	1	1	1	1	1	1	1
1	3	3	1	1	1	3	0	3	1	1	1	1	1	1	6	1	1	1	1	1	1	1	1	1	1	1	1	1	1	1	1	1	1	1	1	1	1	1	1	1	1	1	1	1	1	1	1	1	1
1	3	3	1	2	1	3	0	2	1	1	1	1	1	1	7	2	1	1	1	1	2	1	1	1	4	4	5	1	4	1	4	1	1	4	4	1	1	4	1	1	1	3	1	4	1	4	1	4	1
1	3	3	1	1	1	3	0	0	1	1	2	1	3	1	6	1	1	3	1	1	1	3	1	5	3	1	1	4	1	3	5	1	3	2	3	1	1	1	1	1	1	1	1	1	1	1	1	1	1
1	3	3	1	1	0	3	0	2	2	1	1	2	1	1	8	2	2	2	1	1	1	2	1	1	2	1	5	2	1	4	2	1	4	1	2	2	1	2	1	1	1	1	1	4	1	2	2	2	1
1	3	3	1	2	1	3	0	3	1	1	1	1	1	1	5	1	1	1	1	1	1	2	1	1	1	1	1	1	1	1	1	1	1	1	1	1	1	1	1	1	1	1	1	1	1	1	1	1	1
1	3	3	1	2	1	2	1	3	2	1	1	2	1	2	6	1	1	1	1	1	1	1	1	5	1	5	1	5	1	1	1	1	1	1	1	2	1	2	2	1	2	1	4	4	3	1	1	2	1
1	3	3	1	2	1	3	0	1	1	1	1	1	1	2	30	1	1	1	1	1	1	1	1	1	4	1	4	4	1	1	2	2	1	2	1	4	2	4	1	4	4	4	2	1	1	4	1	1	1
1	3	3	3	1	1	3	0	2	2	2	1	2	3	1	5	4	4	1	3	5	2	1	3	5	2	4	4	4	4	4	4	4	4	4	4	4	4	4	4	4	4	4	4	4	4	4	4	1	4
1	3	3	1	1	1	3	0	4	1	1	1	1	1	1	8	1	1	1	1	1	1	1	1	1	1	1	1	1	4	4	1	1	1	1	4	1	1	1	1	1	1	1	1	1	1	1	1	1	1
1	3	3	1	1	0	3	0	3	1	1	1	2	1	1	7	1	1	1	1	2	1	1	1	1	1	1	1	1	2	1	1	1	1	1	1	1	1	1	1	1	1	1	1	1	1	1	1	1	1
1	3	3	1	2	0	2	0	4	2	2	1	2	1	1	6	1	1	1	1	1	1	1	1	1	1	1	5	1	1	1	1	1	1	1	1	1	1	1	1	1	1	1	1	1	1	1	1	1	1
1	3	3	1	1	1	3	0	3	2	3	3	3	4	3	5	3	4	2	1	3	3	2	4	3	4	3	1	1	1	1	1	1	1	1	1	1	1	1	1	1	1	1	1	1	1	1	1	1	1
1	3	3	1	1	1	2	1	3	2	1	1	1	1	1	7	1	1	1	1	1	1	1	1	1	1	1	1	1	1	1	5	1	5	1	1	1	4	1	1	1	1	1	1	1	1	1	1	5	1
1	3	3	1	2	1	2	0	2	2	1	1	1	4	1	7	2	4	1	1	2	5	3	1	2	1	4	1	3	5	1	1	2	1	4	5	2	1	5	5	2	1	5	1	1	1	5	1	1	1
1	3	3	1	2	1	3	0	1	2	2	1	2	2	1	6	1	1	1	1	1	1	1	1	1	1	1	1	1	1	1	1	1	1	1	1	1	1	1	1	1	1	1	1	1	1	1	1	1	1
1	3	3	1	1	1	3	0	3	1	1	1	1	1	2	4	1	1	1	1	1	1	1	1	1	1	1	1	1	1	1	1	1	1	1	1	1	1	1	1	1	1	1	1	1	1	1	1	1	1
1	3	3	1	1	1	3	0	3	1	1	1	1	1	1	12	1	1	1	1	1	1	1	1	1	1	1	1	1	1	1	1	1	1	1	1	1	1	1	1	1	1	1	1	1	1	1	1	1	1
1	3	3	1	1	0	3	0	1	1	1	1	1	1	1	7	4	2	4	1	1	2	1	1	1	4	1	4	1	1	1	4	4	4	4	1	1	1	1	2	3	2	1	2	2	3	1	2	2	1
1	3	3	1	1	0	3	0	1	1	1	1	1	1	1	7	2	1	1	1	1	1	2	2	1	1	2	1	2	2	2	1	1	1	1	1	1	1	1	1	1	1	1	1	1	1	1	1	1	1
1	3	3	1	2	1	3	0	2	1	1	1	1	1	1	7	1	2	3	1	1	1	2	1	1	1	1	4	1	1	2	1	1	1	1	1	2	2	1	1	1	1	1	2	2	1	1	1	1	1
1	3	3	1	2	1	3	0	3	1	1	1	2	2	1	9	3	1	1	1	2	2	1	4	4	4	4	5	2	1	1	5	2	4	1	1	1	1	1	2	1	1	4	5	5	5	1	1	1	1
1	3	3	1	2	1	3	0	2	2	4	1	3	1	1	6	1	1	1	1	1	1	1	1	1	1	1	1	1	1	1	1	1	1	1	1	1	1	1	1	1	1	1	1	1	1	1	1	1	1
1	3	3	1	2	1	3	0	4	2	1	1	1	1	1	7	1	1	1	1	1	1	1	1	1	1	1	1	1	1	1	1	1	1	1	1	1	1	1	1	1	1	1	1	1	1	1	1	1	1
1	3	3	1	2	0	3	0	2	4	3	4	4	2	3	12	1	1	1	1	1	1	1	1	1	1	1	1	1	1	1	1	1	1	1	1	1	5	1	1	1	1	1	1	1	1	1	1	1	1
1	3	3	1	1	1	3	0	4	3	1	1	1	1	1	5	1	1	1	1	1	1	1	1	1	1	1	1	1	1	1	1	1	1	1	1	1	1	1	1	1	1	1	1	1	1	1	1	1	1
1	3	3	1	1	1	3	0	2	1	1	1	1	1	1	14	1	1	1	1	1	1	1	3	2	4	4	4	4	3	3	5	1	1	1	1	1	2	1	1	1	1	1	1	1	1	1	1	1	1
1	3	3	1	1	1	3	0	4	1	1	1	2	1	1	5	1	1	1	1	1	1	1	1	1	1	1	1	1	1	1	5	1	1	5	5	1	1	5	1	1	1	1	1	5	1	1	1	1	1
1	3	3	1	1	1	3	0	1	1	1	1	1	1	1	8	3	3	3	1	1	1	1	3	1	3	3	3	3	3	1	1	1	1	1	3	1	4	1	1	1	1	1	1	1	1	1	1	4	1
1	3	3	1	1	1	3	0	3	1	2	2	4	1	1	0	5	2	2	3	5	5	1	5	5	5	5	1	4	4	4	4	5	5	2	5	3	1	1	5	5	5	5	3	3	1	1	5	5	5
1	3	3	1	1	0	2	1	3	1	1	1	1	1	1	6	1	1	1	1	1	1	1	1	1	1	1	1	1	1	1	1	1	1	1	1	1	1	1	1	1	1	1	1	2	1	1	1	1	1
1	3	3	1	1	0	2	1	3	1	1	1	1	1	1	6	1	1	1	1	1	1	1	1	1	1	1	1	1	1	1	1	1	1	1	1	1	1	1	1	1	1	1	1	2	1	1	1	1	1
1	3	3	1	1	0	3	0	2	1	1	1	1	1	1	11	2	2	1	1	1	3	3	2	4	1	1	1	2	1	1	2	1	1	2	1	1	1	1	1	1	1	1	2	2	1	4	2	1	1
1	3	3	1	1	0	3	0	3	2	2	1	4	1	1	11	3	1	1	1	1	3	2	3	5	4	3	1	3	3	3	2	2	3	3	3	3	2	2	2	2	3	2	5	5	5	5	3	4	1
1	3	3	1	1	0	3	0	3	1	1	2	1	1	1	5	1	1	1	1	1	1	1	1	1	1	1	1	1	1	1	1	1	1	1	1	1	1	1	1	1	1	1	1	1	1	1	1	1	1
1	3	3	1	2	1	3	0	1	1	1	1	1	1	1	6	1	1	1	1	1	1	1	1	1	1	1	1	1	1	1	1	1	1	1	1	1	1	1	1	1	1	1	1	1	1	1	1	1	1
1	3	3	1	2	1	3	0	4	1	1	1	1	1	1	8	1	1	1	1	2	1	1	1	1	1	1	4	1	1	1	4	1	1	1	1	1	4	1	1	1	1	1	1	1	1	1	1	1	1
1	3	3	1	2	1	3	0	2	1	1	1	1	1	1	2	1	2	1	1	1	1	2	1	2	1	2	2	1	1	1	2	1	1	1	1	1	1	1	5	5	1	2	5	1	1	1	1	1	1
1	3	3	1	2	1	3	0	4	1	1	1	1	2	2	9	1	1	1	1	4	1	1	1	1	1	1	1	1	1	1	1	1	1	1	1	1	1	1	1	1	1	1	1	1	1	1	1	1	1
1	3	3	1	2	1	3	0	3	1	2	1	2	1	1	8	1	1	1	1	1	1	1	1	1	1	1	3	1	1	1	1	1	1	1	1	1	1	1	1	1	1	1	1	1	1	1	1	1	1
1	3	3	1	2	1	3	0	1	2	2	1	2	2	1	8	3	2	2	2	2	2	4	2	2	2	4	2	1	1	2	4	2	2	4	4	4	1	2	3	2	2	1	1	2	1	2	4	2	1
1	3	3	1	2	1	3	0	1	2	1	1	3	3	1	8	5	4	1	1	3	1	1	1	3	2	1	1	3	4	4	3	4	2	3	4	4	5	4	5	2	5	3	1	5	5	4	4	3	5
1	3	3	1	2	1	3	0	4	1	1	1	1	1	1	5	1	1	1	1	1	1	1	1	1	1	1	1	1	1	1	1	1	1	1	1	1	1	1	1	1	1	1	1	1	1	1	1	1	1
1	3	3	1	2	0	3	0	3	1	1	1	2	3	1	6	2	2	1	1	1	1	1	1	1	1	1	2	1	1	1	1	1	1	1	1	1	1	1	1	1	1	1	1	1	1	1	1	1	2
1	3	3	1	0	0	3	0	4	2	1	1	2	1	1	9	1	1	1	1	1	1	1	1	1	1	1	1	1	1	1	1	1	1	1	1	1	1	1	1	1	1	1	1	1	1	1	1	1	1
1	3	3	3	2	1	3	0	3	4	1	4	1	1	1	7	1	1	1	1	1	1	1	1	1	1	1	1	1	1	1	1	1	1	1	1	1	1	1	1	1	1	1	1	1	1	1	1	1	1
1	3	3	1	1	1	3	0	4	1	1	1	2	1	1	4	4	5	2	1	1	1	2	1	1	1	1	1	1	1	1	1	1	1	1	1	1	1	1	1	1	1	1	1	1	1	1	1	1	1
1	3	3	6	2	1	3	0	4	1	1	1	1	1	1	6	1	1	1	1	1	1	1	1	1	1	1	5	1	1	1	1	1	1	1	1	1	1	1	1	1	1	1	1	1	1	1	1	1	1
1	3	3	1	1	1	3	0	4	1	1	1	1	1	1	12	2	1	1	1	3	1	3	1	1	1	2	1	1	1	1	1	1	1	1	1	1	2	1	1	1	1	1	3	1	1	1	1	1	1
1	3	3	1	1	1	3	0	3	2	2	1	1	3	1	8	1	1	1	1	1	1	1	1	1	1	1	1	1	1	1	1	1	1	1	1	1	1	1	1	1	1	1	1	1	1	1	1	1	1
1	3	3	1	1	1	3	0	3	1	1	1	1	1	1	8	1	1	1	1	1	1	4	4	1	1	1	1	1	1	1	1	1	1	1	1	1	1	1	1	1	1	1	1	4	1	4	4	1	1
1	3	3	1	1	1	3	0	4	1	1	1	1	1	1	5	3	1	1	1	1	1	4	1	1	1	1	4	4	1	1	1	1	1	1	1	1	4	1	1	1	1	1	4	1	2	1	1	1	1
1	3	3	1	1	0	3	0	1	3	3	1	1	3	1	6	3	3	5	1	3	2	2	1	1	1	1	1	1	1	1	1	1	1	1	1	1	1	1	1	1	1	1	1	1	1	1	1	1	1
1	3	3	1	1	0	3	0	2	1	3	3	3	1	1	5	1	1	1	1	1	1	1	1	1	1	1	1	1	1	1	1	1	1	1	1	1	1	1	1	1	5	1	1	1	1	1	1	1	1
1	3	3	1	1	0	3	0	2	2	1	2	2	2	2	8	1	1	1	1	1	1	2	1	2	2	2	1	1	1	1	1	1	1	1	1	1	1	1	1	1	1	1	1	1	1	1	1	1	1
1	3	3	1	2	1	2	1	4	3	1	1	2	1	1	8	1	1	1	1	1	1	1	1	1	1	1	1	1	1	1	1	1	1	1	1	1	1	1	1	1	1	1	1	1	1	1	1	1	1
1	3	3	1	2	1	2	0	2	1	1	1	2	1	1	11	1	1	1	1	5	1	1	1	1	1	1	1	1	1	1	1	1	1	1	1	1	1	1	1	1	1	1	1	1	1	1	1	1	1
1	3	3	1	2	1	3	0	1	4	2	1	2	2	1	6	2	1	1	1	1	1	1	1	1	1	1	1	4	5	1	5	1	4	1	4	2	5	2	1	1	1	1	5	1	2	1	1	2	1
1	3	3	1	2	1	3	0	1	1	2	1	1	4	3	30	3	1	1	3	4	1	3	4	5	4	3	4	2	5	4	5	1	5	1	1	2	5	1	1	1	1	1	5	5	5	3	5	3	1
1	3	3	1	2	0	3	0	2	2	1	1	1	1	2	6	3	3	1	3	2	4	4	3	1	1	1	4	1	1	1	1	4	1	1	1	4	1	1	1	1	1	3	5	5	5	1	3	1	1
1	3	3	1	1	1	3	0	2	1	1	1	1	1	1	8	5	5	2	1	2	3	3	1	4	5	4	5	3	4	4	5	3	3	4	1	3	1	3	3	1	3	3	4	4	4	1	1	4	1
1	3	3	1	1	1	3	0	3	3	2	4	2	2	2	7	3	2	1	5	4	3	3	5	3	3	2	5	3	3	2	2	2	5	4	4	2	2	3	3	1	5	1	5	5	3	2	3	3	1
1	3	3	1	1	0	3	0	1	2	2	1	2	1	1	5	2	2	3	1	2	2	2	2	4	1	2	2	1	2	2	2	2	1	2	2	1	1	2	1	1	1	3	2	1	1	1	1	1	1
1	3	3	2	2	1	2	1	2	2	2	1	1	1	1	6	1	1	1	1	1	1	1	1	5	1	1	5	1	1	1	1	1	1	1	1	1	5	1	1	1	1	1	1	1	1	1	1	1	2
1	3	3	1	1	1	2	1	4	4	2	4	4	2	1	11	1	1	1	1	1	1	1	1	1	1	1	5	1	1	1	1	1	1	1	1	1	5	1	1	1	1	1	1	1	1	5	1	1	1
1	3	3	1	1	1	3	0	3	1	1	1	1	1	1	6	1	1	1	1	5	1	1	1	2	1	5	4	1	1	1	4	1	1	3	1	1	1	1	1	1	5	3	5	4	1	4	5	1	1
1	3	3	1	1	1	3	0	2	1	2	1	1	1	1	7	1	1	1	1	3	1	1	3	1	1	3	1	3	1	3	3	1	1	1	5	1	3	1	1	3	5	1	1	3	3	3	3	1	5
1	3	3	1	1	0	3	0	3	1	1	1	1	1	1	6	1	1	1	1	3	1	1	1	1	1	1	4	1	1	1	1	1	1	1	1	1	1	1	1	1	1	1	1	1	1	1	1	1	1
1	3	3	3	2	1	1	0	3	1	4	1	1	1	1	0	5	1	4	5	5	5	5	1	5	1	1	1	1	1	1	1	1	5	3	1	5	5	5	5	5	5	5	5	5	5	5	5	5	1
1	3	3	1	1	1	3	0	4	1	1	1	1	1	1	12	1	1	1	1	1	1	1	1	1	1	1	1	1	1	1	1	1	1	1	1	1	1	1	1	1	1	1	1	1	4	1	1	1	1
1	3	3	1	1	1	3	0	4	2	2	1	3	1	1	6	1	1	1	1	5	1	1	1	1	1	1	1	1	1	1	1	1	1	1	1	1	1	1	1	1	1	1	1	1	1	1	1	1	1
1	3	3	1	1	0	3	0	3	1	2	1	1	1	1	6	1	1	1	1	5	1	1	1	1	1	1	1	1	1	1	1	1	1	1	1	1	1	1	1	1	1	1	1	1	1	1	1	1	1
1	3	3	1	2	0	3	0	4	1	1	1	1	1	1	3	1	1	1	1	1	3	4	1	1	1	1	1	1	1	1	1	1	1	1	1	1	1	1	1	1	1	1	1	1	1	1	1	1	1
1	3	3	1	2	1	3	0	2	1	1	1	4	1	1	5	2	4	5	5	5	5	2	2	4	5	2	5	5	5	2	5	5	5	2	5	2	1	2	5	5	4	5	5	5	1	5	1	5	1
1	3	3	1	1	1	3	0	4	2	4	3	4	3	4	7	1	1	3	3	3	5	5	3	5	3	5	5	2	5	5	5	2	5	1	5	3	1	5	2	2	1	3	4	4	4	4	4	5	1
1	3	3	1	1	1	3	0	3	2	4	3	4	3	2	5	1	1	1	1	1	1	1	1	1	1	1	1	1	1	1	1	1	1	1	1	1	1	1	1	1	1	1	1	1	1	1	1	1	1
1	3	3	1	1	0	3	0	2	2	2	1	1	1	1	5	4	4	1	1	2	4	1	5	1	1	4	4	4	5	3	1	3	1	1	3	2	1	2	1	1	1	1	5	5	5	2	1	1	1
1	3	3	1	2	0	3	0	1	2	1	1	1	2	1	6	2	2	1	1	1	1	1	2	1	1	3	4	1	1	1	1	1	1	1	1	1	4	1	1	1	3	1	4	1	1	1	1	1	1
1	3	3	3	2	0	2	0	4	1	2	4	4	4	2	12	3	1	1	1	1	4	1	5	1	3	5	3	1	4	1	1	1	1	2	1	1	1	1	1	1	1	1	2	2	4	1	5	5	1
1	3	3	1	1	1	3	0	2	2	2	1	1	1	1	7	3	1	1	1	1	3	4	1	1	1	2	4	1	1	1	4	1	3	3	1	1	3	1	1	1	3	1	4	5	5	2	1	5	2
1	3	3	1	2	1	1	0	4	1	1	1	1	1	1	5	1	1	1	1	1	1	1	1	1	1	1	1	1	1	1	1	1	1	1	1	1	1	1	1	1	1	1	1	1	1	1	1	1	1
1	3	3	1	2	1	2	1	3	1	1	1	1	1	1	6	4	1	3	1	1	3	4	1	1	1	4	4	1	1	4	1	1	1	1	1	1	4	2	1	1	1	3	2	2	2	2	1	1	1
1	3	3	1	2	1	2	0	3	3	2	2	2	2	3	4	1	1	1	1	1	1	1	1	1	1	1	5	1	1	1	1	1	1	1	1	1	1	1	1	1	1	1	1	1	1	1	1	1	1
1	3	3	1	1	1	3	0	4	3	1	1	1	1	1	30	5	3	5	3	1	1	1	1	1	1	1	1	1	1	1	1	1	1	1	1	2	1	1	2	5	3	4	1	3	5	1	1	1	1
1	3	3	1	1	1	3	0	2	1	1	1	1	1	1	5	1	1	1	1	1	1	1	1	1	1	1	1	1	1	1	1	1	1	1	1	1	1	1	1	1	1	1	1	1	1	1	1	1	1
1	3	3	1	1	1	3	0	3	1	2	1	2	1	1	5	2	3	1	1	1	1	2	1	2	1	4	5	1	1	1	2	1	2	1	2	2	2	1	2	1	1	1	4	1	1	1	2	1	1
1	3	3	1	1	1	3	0	2	2	3	1	4	4	2	7	2	3	1	1	1	1	4	1	1	1	1	1	1	1	1	1	1	1	1	3	1	1	1	5	1	1	1	1	1	1	1	1	1	1
1	3	3	1	1	1	2	0	1	4	1	1	2	1	1	8	2	2	3	1	1	1	1	1	1	1	1	1	1	1	1	1	1	1	1	1	1	1	1	1	1	1	1	1	1	1	1	1	1	1
1	3	3	1	2	1	2	0	4	2	1	3	3	1	2	5	1	1	1	1	2	2	1	3	2	4	2	4	1	4	1	4	1	1	4	1	1	1	1	1	1	1	1	1	1	5	1	1	1	1
1	3	3	1	2	1	2	1	4	1	1	1	1	1	1	8	1	1	1	1	1	5	5	1	1	1	1	1	3	2	1	3	1	1	2	1	1	1	1	1	1	1	1	1	1	1	1	1	1	1
1	3	3	1	1	1	3	0	4	1	1	1	1	1	1	0	1	1	1	1	1	1	1	1	1	1	1	1	1	1	1	1	1	1	1	1	1	1	1	1	1	1	1	1	1	1	1	1	1	1
1	3	4	1	1	1	3	0	1	1	1	1	1	1	1	0	1	1	1	1	1	1	1	1	1	1	1	1	1	1	1	1	1	1	1	1	1	1	1	1	1	1	2	2	1	1	1	1	1	1
1	3	4	1	1	1	2	0	3	1	1	1	1	1	1	5	1	1	1	1	1	1	1	2	5	1	1	1	1	5	1	1	1	1	1	1	1	1	1	1	1	1	1	1	1	1	1	1	1	1
1	3	4	1	1	1	3	0	3	1	4	1	2	2	2	6	3	5	1	1	1	2	4	3	5	3	1	2	2	5	2	1	1	1	1	1	1	1	2	1	1	1	2	2	5	1	3	1	1	1
1	3	4	1	2	0	3	0	3	1	1	1	2	1	1	7	2	1	3	1	1	3	5	5	5	5	1	3	4	5	4	5	3	4	4	5	4	2	3	1	1	2	3	1	1	1	5	5	5	1
1	3	4	1	2	0	3	0	3	1	1	1	1	4	1	10	1	1	1	1	1	1	1	1	1	1	1	1	1	1	1	1	1	2	2	2	2	2	2	1	1	3	1	1	1	1	1	1	1	1
1	3	4	1	1	0	3	0	4	1	1	1	1	1	2	9	3	4	1	1	1	1	1	2	1	3	1	3	2	3	2	1	1	1	5	2	5	2	2	1	1	1	1	2	2	2	1	1	1	1
1	3	4	1	1	1	3	0	1	1	2	3	4	3	2	6	2	3	5	1	4	2	2	5	5	1	2	5	4	5	3	1	1	5	1	1	3	1	1	1	1	5	1	4	3	1	1	3	5	1
1	3	4	1	2	1	3	0	1	1	2	2	3	3	1	8	2	2	1	5	5	5	2	2	1	1	1	1	1	1	1	1	1	1	1	1	1	1	1	1	1	1	1	1	1	1	1	1	1	1
1	3	4	1	1	1	3	0	0	2	1	2	1	4	4	6	5	5	5	5	5	5	5	5	5	1	2	1	1	5	1	5	5	4	1	1	1	1	1	1	1	4	5	5	1	1	5	5	1	1
1	3	4	1	1	1	2	1	4	2	1	1	2	1	1	4	1	1	1	1	1	1	1	1	1	1	1	1	1	1	1	1	1	1	1	1	1	4	1	1	1	1	1	1	1	1	1	1	1	1
1	3	4	1	2	1	3	0	3	1	1	1	1	1	1	7	4	1	1	1	3	3	2	1	4	1	1	4	1	1	3	1	2	1	1	1	2	2	1	1	1	1	1	2	1	1	1	1	1	1
1	3	4	1	1	1	3	0	3	1	1	1	2	1	1	7	1	3	1	1	1	3	3	1	1	1	3	4	1	1	3	1	1	1	3	1	1	1	1	1	1	1	1	3	1	1	1	1	1	1
1	3	4	1	1	1	3	0	2	1	1	1	1	2	2	6	1	1	1	1	1	1	1	1	1	1	1	1	1	1	1	1	1	1	1	1	1	1	1	1	1	1	1	1	1	1	1	1	1	1
1	3	4	1	1	1	3	0	1	1	1	1	1	1	1	30	1	1	1	1	1	1	1	1	1	1	1	1	1	1	1	1	1	1	1	1	1	1	1	1	1	1	1	1	1	1	1	1	1	1
1	3	4	1	1	1	3	0	3	1	1	1	1	1	1	8	1	1	1	1	1	1	1	1	1	2	2	2	1	1	1	1	1	1	2	2	2	4	1	1	1	1	1	5	5	1	1	1	2	1
1	3	4	1	1	1	3	0	1	1	1	2	3	1	1	5	4	1	1	1	1	1	1	1	4	2	2	4	1	1	1	1	1	1	1	1	3	1	1	1	1	1	1	1	4	1	4	1	1	1
1	3	4	1	1	0	3	0	3	2	4	1	4	4	3	10	1	1	1	1	1	1	1	1	1	1	1	1	1	1	1	1	1	1	1	1	1	1	1	1	1	1	1	1	1	1	1	1	1	1
1	3	4	1	2	1	2	1	4	1	2	2	1	1	1	6	1	1	1	1	1	1	1	1	1	1	1	1	1	1	1	1	3	1	1	4	1	1	5	3	5	2	4	1	1	1	1	1	1	1
1	3	4	1	2	1	3	0	2	1	1	1	1	1	1	9	1	1	1	1	1	1	1	1	1	1	1	1	1	1	1	1	1	1	1	1	1	1	1	1	1	1	1	1	1	1	1	1	1	2
1	3	4	1	2	1	3	0	1	1	1	1	1	1	1	7	1	1	1	1	1	1	1	1	1	1	1	1	1	2	1	1	1	2	1	1	1	1	1	1	1	1	1	1	1	1	1	1	2	1
1	3	4	1	2	1	3	0	2	1	1	2	1	1	1	6	1	1	1	1	2	1	5	1	1	1	1	5	1	1	1	1	1	1	1	1	1	1	1	1	1	1	1	1	1	1	1	1	1	2
1	3	4	1	1	1	3	0	3	1	1	2	3	1	1	5	3	1	1	1	1	1	1	1	1	1	1	4	1	1	1	1	1	1	1	1	1	1	1	1	1	1	1	4	4	1	1	1	1	1
1	3	4	1	1	1	3	0	2	1	1	1	1	1	1	6	4	1	1	1	1	1	1	1	1	1	1	1	1	1	1	1	1	1	1	1	1	1	1	1	1	1	1	1	1	1	1	1	1	1
1	3	4	1	1	1	3	0	3	1	2	4	3	1	1	6	1	1	1	1	1	1	1	1	1	1	1	1	1	1	1	1	1	1	1	1	1	1	1	1	1	1	1	1	1	1	1	1	1	1
1	3	4	1	1	1	3	0	4	2	2	2	1	1	1	7	1	1	1	1	5	1	1	1	1	1	1	1	1	1	1	1	1	1	1	1	1	1	1	1	1	1	1	1	1	1	1	1	1	1
1	3	4	1	1	1	3	0	2	1	1	1	1	1	1	6	5	1	2	1	1	2	2	2	4	3	1	2	1	3	1	2	2	1	1	2	1	1	2	2	1	1	2	5	1	1	1	1	1	1
1	3	4	1	1	1	3	0	3	2	1	1	2	1	1	6	1	1	1	1	1	1	1	1	1	1	1	1	1	1	1	1	1	1	1	1	1	1	1	1	1	1	1	1	1	1	1	1	1	1
1	3	4	1	1	0	3	0	2	1	1	1	1	1	1	8	1	1	1	1	1	1	1	1	1	1	1	1	1	1	1	1	1	1	1	1	1	1	1	1	1	1	1	1	1	1	1	1	1	1
1	3	4	1	2	1	2	1	3	3	1	1	1	2	2	8	1	1	1	1	1	1	1	1	1	1	1	1	1	1	1	1	1	1	1	1	1	1	1	1	1	1	1	1	1	1	1	1	1	1
1	3	4	1	2	1	3	0	3	1	1	1	1	1	1	6	1	1	1	1	1	1	1	1	1	1	1	1	1	1	1	1	1	1	1	1	1	1	1	1	1	1	1	1	1	1	1	1	1	1
1	3	4	1	2	0	2	0	2	1	1	1	1	1	1	7	1	1	1	1	1	1	1	1	1	1	1	1	1	1	1	1	1	1	1	4	1	4	1	1	1	1	1	1	1	1	1	1	1	1
1	3	4	1	2	0	3	0	4	4	2	4	4	1	4	8	1	1	1	5	1	1	1	1	1	1	1	1	1	1	1	1	1	1	1	1	1	1	1	1	1	1	1	1	1	1	1	1	1	1
1	3	4	1	2	0	3	0	3	1	1	1	2	2	1	7	1	1	1	1	1	1	5	1	1	1	5	5	5	1	1	5	1	5	1	1	5	1	1	1	1	1	1	5	5	5	1	1	1	1
1	3	4	3	2	0	3	0	4	1	1	1	1	1	1	7	1	1	1	1	1	1	1	1	1	1	1	1	1	1	1	1	1	1	1	1	1	1	1	1	1	1	1	1	1	1	1	1	1	1
1	3	4	1	1	1	3	0	1	1	1	1	1	1	1	7	1	2	1	1	1	2	2	2	1	1	2	5	2	1	2	1	1	1	1	1	2	2	1	1	1	1	1	1	2	2	1	1	1	1
1	3	4	1	1	1	3	0	3	1	1	1	1	1	1	6	2	2	4	1	2	4	2	2	2	2	2	2	2	2	2	2	4	4	1	5	4	2	2	2	2	2	2	2	4	4	4	5	4	4
1	3	4	1	2	0	3	0	1	1	1	1	1	3	3	9	1	1	1	1	4	1	1	1	1	1	1	1	1	1	1	1	1	1	1	1	1	1	1	1	1	1	1	1	1	1	1	1	1	1
1	3	4	1	1	1	1	1	2	1	1	1	1	1	2	9	1	1	1	1	1	1	1	1	1	1	1	1	1	2	3	1	1	1	1	1	4	4	1	1	1	2	1	1	1	1	1	1	1	1
1	3	4	1	1	1	1	0	1	2	2	1	1	1	1	7	1	2	4	2	4	4	2	5	4	5	5	5	5	3	2	2	4	3	2	4	3	5	2	3	1	1	1	1	4	4	1	1	1	1
1	3	4	1	1	1	3	0	2	1	1	1	1	2	1	5	5	1	1	1	1	1	1	1	1	3	1	5	1	1	1	1	1	1	1	1	1	5	1	1	1	1	1	1	1	1	5	1	1	1
1	3	4	1	1	1	3	0	2	1	1	1	1	1	1	7	3	3	5	1	1	1	1	1	1	1	1	1	1	1	1	1	1	1	1	1	1	1	1	1	1	1	1	1	1	1	1	1	1	1
1	3	4	1	1	1	3	0	1	1	1	1	1	3	1	7	3	1	4	1	1	4	1	1	2	4	1	1	1	1	1	1	1	1	1	1	1	4	1	1	1	1	1	1	1	1	1	1	1	1
1	3	4	1	1	1	3	0	1	1	2	1	1	1	2	7	5	2	2	1	1	5	5	2	2	3	5	5	3	1	5	1	5	1	1	1	1	1	1	1	1	5	2	5	5	1	1	1	1	1
1	3	4	1	1	1	3	0	3	1	1	1	2	4	1	8	4	4	2	1	1	4	2	3	3	1	4	4	4	2	5	5	4	2	1	4	4	4	1	3	1	1	1	5	4	1	3	2	3	1
1	3	4	1	1	0	2	0	4	1	1	1	4	3	1	7	2	4	1	1	1	1	2	1	2	2	2	5	1	1	5	1	1	1	1	1	2	2	1	1	1	2	1	2	2	2	2	1	2	1
1	3	4	1	1	0	3	0	3	1	1	1	1	1	1	8	1	1	1	3	1	1	2	1	1	1	2	5	2	1	1	1	1	2	1	1	1	1	1	1	1	1	1	2	2	1	1	1	1	1
1	3	4	1	2	1	3	0	4	2	1	1	3	1	3	14	2	4	2	2	2	1	1	2	5	5	5	5	5	2	1	2	2	5	5	5	5	1	1	1	1	3	4	4	1	2	2	2	4	5
1	3	4	1	2	1	3	0	3	1	1	2	2	4	4	9	4	2	1	1	1	1	1	1	1	1	1	5	2	1	2	1	2	1	4	1	2	1	1	1	1	2	1	5	4	2	1	1	1	1
1	3	4	1	2	0	3	0	4	1	1	1	2	2	1	8	1	1	1	1	1	1	1	1	1	1	1	1	1	1	1	1	1	1	1	1	1	1	1	1	1	1	1	1	1	1	1	1	1	1
1	3	4	1	0	0	3	0	2	1	1	2	1	4	3	4	1	3	2	3	5	2	3	1	2	3	2	2	2	2	2	2	1	2	2	2	2	4	2	1	2	1	1	1	2	1	1	2	2	1
1	3	4	1	1	1	3	0	1	4	4	4	4	1	3	5	1	1	1	1	1	1	1	1	1	1	1	1	1	1	1	1	1	1	1	1	1	1	1	1	1	1	1	1	1	1	1	1	1	1
1	3	4	1	2	1	3	0	2	4	1	1	4	4	1	8	1	1	1	1	1	1	1	1	1	1	1	1	1	1	1	1	1	1	1	1	1	1	1	1	1	1	1	3	3	1	1	1	1	1
1	3	4	1	2	0	2	1	4	1	1	1	1	1	2	5	1	3	1	1	1	1	1	1	4	1	1	1	1	1	1	1	1	1	2	1	1	2	1	1	1	4	3	4	1	2	2	4	4	1
1	3	4	1	1	1	3	0	2	1	1	1	1	1	1	8	1	1	1	1	1	1	1	1	1	1	1	1	1	1	1	1	1	1	1	1	1	1	1	1	1	1	1	1	1	1	1	1	1	1
1	3	4	1	2	1	2	0	3	2	2	1	1	1	1	5	1	1	1	1	1	1	1	1	1	1	1	1	1	1	1	1	1	1	1	1	1	1	1	1	1	1	1	1	1	1	1	1	1	1
1	3	4	1	2	1	3	0	3	1	1	1	1	1	1	5	1	1	1	1	1	1	1	1	1	1	1	1	1	1	1	1	1	1	1	2	1	1	1	1	1	1	1	1	1	1	1	1	1	1
1	3	4	1	2	1	3	0	4	1	2	1	1	1	1	17	1	1	1	1	1	1	1	1	1	1	1	3	1	1	1	1	1	1	1	1	1	2	1	1	1	1	1	1	1	1	1	1	1	1
1	3	4	1	1	1	3	0	4	1	1	1	1	4	1	5	1	5	5	5	5	5	1	5	5	5	5	5	5	5	5	5	5	5	5	1	5	1	5	1	5	1	5	5	5	1	5	5	5	1
1	3	4	1	1	0	1	0	1	3	3	1	2	2	1	7	4	2	1	1	5	3	2	4	2	1	5	5	2	1	2	1	2	1	2	5	3	2	3	1	3	2	3	5	1	5	1	1	1	1
1	3	4	1	2	1	3	0	4	1	1	1	1	1	1	7	1	1	1	1	1	1	1	1	1	1	1	1	1	1	1	1	1	1	1	1	1	1	1	1	1	1	1	1	1	1	1	1	1	1
1	3	4	1	1	1	3	0	4	1	1	1	1	1	1	0	1	1	1	1	1	1	1	1	1	1	1	1	1	3	1	2	1	1	1	1	1	1	1	1	1	1	1	1	5	1	1	1	1	1
1	3	4	1	2	1	2	1	2	1	1	1	1	1	1	8	5	5	3	2	3	5	3	3	3	5	3	3	3	5	3	5	3	5	2	3	3	1	5	1	1	1	3	5	5	5	3	1	5	1
1	3	4	1	2	1	3	0	2	1	1	2	3	1	1	5	5	1	1	1	1	1	1	1	1	1	1	1	1	1	1	1	1	1	1	1	1	1	1	1	1	1	1	1	1	1	1	1	1	1
1	3	4	1	2	1	2	1	1	2	4	4	4	2	2	3	1	1	1	5	5	3	3	4	1	4	5	5	5	3	3	5	5	5	1	5	5	1	5	3	1	1	5	1	3	1	5	5	5	1
1	3	4	1	1	1	3	0	2	1	1	1	1	1	2	6	1	1	1	2	2	1	1	1	1	1	1	1	4	2	1	1	2	1	1	2	2	4	2	4	1	1	2	5	5	2	1	1	1	4
1	3	4	1	2	1	2	1	3	2	4	4	4	3	1	8	1	1	1	1	1	1	1	1	1	1	1	1	1	4	2	1	1	1	1	5	1	5	5	4	1	1	1	1	1	1	5	5	1	1
1	3	4	1	2	1	3	0	3	2	3	1	3	1	1	8	5	5	1	1	1	1	1	1	1	1	5	4	1	1	1	1	1	1	1	1	1	1	1	1	1	1	1	1	1	1	1	1	1	1
1	3	4	1	2	1	2	1	2	2	3	1	4	2	1	7	1	1	1	5	1	1	1	1	1	1	1	1	1	1	5	2	2	2	2	1	1	1	1	1	1	1	1	1	1	1	1	1	1	1
1	3	5	3	1	0	3	0	2	2	2	2	2	2	2	6	2	1	1	2	2	2	2	2	2	2	2	1	1	1	1	1	2	1	1	2	1	1	1	1	1	1	2	1	2	1	1	1	1	1
1	3	3	1	1	0	2	1	2	1	1	1	1	1	1	7	1	1	1	1	1	1	2	2	2	1	1	5	4	1	2	1	1	4	1	2	1	1	2	1	1	2	1	4	5	1	1	3	4	1
1	3	3	3	1	1	3	0	2	1	1	1	1	4	1	10	1	1	1	3	3	4	1	3	1	1	1	5	1	5	5	1	1	1	5	5	2	2	5	5	5	1	1	3	1	1	1	1	4	5
1	3	4	1	1	1	3	0	0	1	1	1	1	1	1	10	4	4	4	4	4	4	4	4	4	4	4	4	4	4	4	4	4	4	4	4	4	4	4	4	4	4	1	1	4	4	4	4	4	4
0	0	0	1	1	1	3	0	3	2	1	2	3	1	1	12	1	1	1	2	1	1	1	1	1	1	1	1	1	1	1	1	1	1	1	1	1	1	1	1	1	1	1	1	1	1	1	1	1	1
0	0	0	2	1	1	3	0	3	1	1	1	1	1	1	6	1	1	1	5	5	1	1	1	1	1	1	5	1	1	1	1	1	1	1	1	1	3	1	1	5	1	1	1	1	1	1	1	1	1
0	0	0	1	1	1	3	0	1	2	1	2	2	2	2	6	5	5	5	5	3	1	1	4	5	1	5	1	2	1	1	1	1	1	1	5	1	1	1	1	1	1	1	1	1	1	4	1	1	1
0	0	1	1	2	1	2	1	4	4	1	2	2	2	1	8	1	1	1	1	1	1	1	1	1	1	1	1	1	1	1	1	1	1	1	1	1	1	1	1	1	1	1	1	1	1	1	1	1	1
0	0	1	1	1	0	3	0	1	1	1	2	4	1	1	0	1	1	1	1	1	1	1	1	1	1	1	1	1	1	1	1	1	1	1	1	1	1	1	1	1	1	1	1	1	1	1	1	1	1
0	0	1	1	1	0	3	0	1	1	1	2	4	1	1	11	1	1	1	1	1	1	1	1	1	1	1	1	1	1	1	1	1	1	1	1	1	1	1	1	1	1	1	1	1	1	1	1	1	1
0	0	1	2	0	0	3	0	3	1	1	1	2	1	1	30	1	1	1	4	1	1	4	4	4	4	4	4	1	1	1	1	1	1	1	1	1	1	1	1	1	1	1	1	1	1	1	1	1	1
0	0	1	2	0	0	3	0	3	1	1	1	2	1	1	30	1	1	1	4	1	1	4	4	4	4	4	4	1	1	1	1	1	1	1	1	1	1	1	1	1	1	1	1	1	1	1	1	1	1
0	0	1	1	2	1	3	0	3	1	1	2	3	1	1	4	1	1	1	3	1	1	1	1	1	1	1	1	1	1	1	1	1	1	1	1	1	1	1	1	1	1	1	3	1	3	1	1	1	3
0	0	1	1	2	1	3	0	3	2	2	1	1	2	1	8	1	1	1	1	4	1	1	1	1	1	1	1	1	1	1	1	1	1	1	1	1	1	1	1	1	1	1	1	1	1	1	1	1	1
0	0	1	1	1	1	3	0	2	2	1	1	1	1	1	7	1	1	1	1	1	1	1	1	1	1	1	1	1	1	1	1	1	1	1	1	1	1	1	1	1	1	1	1	1	1	1	1	1	1
0	0	1	1	2	1	3	0	3	4	4	4	4	4	4	8	1	1	1	1	1	1	1	1	1	1	1	1	1	1	1	1	1	1	1	1	1	1	1	1	1	1	1	1	1	1	1	1	1	1
0	0	1	1	1	0	3	0	1	1	4	1	1	4	1	5	1	1	1	1	1	1	1	1	1	1	1	1	1	1	1	1	1	1	1	1	1	1	1	1	1	1	1	1	1	1	1	1	1	1
0	0	1	1	1	1	3	0	3	2	2	1	1	1	2	7	1	1	1	1	1	1	1	1	1	1	1	1	1	1	1	1	1	1	1	1	1	1	1	1	1	1	1	1	1	1	1	1	1	1
0	0	1	1	2	1	3	0	3	2	2	2	1	3	2	19	2	3	1	1	1	1	1	1	1	2	2	5	1	5	3	4	1	1	5	5	3	5	1	1	5	5	5	5	3	4	5	4	4	4
0	0	2	1	0	0	3	0	2	2	3	3	2	2	4	30	2	3	2	5	4	5	4	3	4	3	4	5	3	2	4	3	5	5	2	5	4	2	3	4	3	3	4	3	5	3	4	3	5	4
0	0	5	1	1	1	3	0	3	1	1	1	1	1	1	30	1	1	1	1	1	1	1	1	1	1	1	1	1	1	1	1	1	1	1	1	1	1	1	1	1	1	1	5	1	1	1	1	1	1
0	0	0	1	1	1	3	0	2	1	1	1	2	1	3	6	1	4	5	1	1	5	5	1	1	1	3	1	1	4	3	3	3	5	5	1	1	1	1	1	1	1	1	1	1	1	1	5	5	1
0	0	0	1	1	1	3	0	3	1	1	1	2	1	2	6	1	1	1	1	1	1	1	1	1	1	1	1	1	1	1	1	1	1	1	1	1	1	1	1	1	1	1	1	1	1	1	1	1	1
0	0	0	1	1	0	3	0	3	2	1	2	4	2	1	5	2	1	1	1	3	2	4	4	1	2	4	1	2	5	5	4	2	3	1	2	1	3	4	1	1	5	3	2	4	4	1	3	2	1
0	0	0	1	1	1	3	0	3	1	1	1	2	1	1	6	1	1	1	1	1	1	1	1	1	1	1	1	1	1	1	1	1	1	1	1	1	1	1	1	1	1	1	1	1	1	1	1	1	1
0	0	0	1	2	0	2	1	3	2	2	3	3	3	2	5	1	1	1	1	1	1	1	1	1	1	1	1	1	1	1	1	1	1	1	1	1	1	1	1	1	1	1	2	2	1	1	1	1	1
0	0	0	1	2	1	3	0	3	1	1	1	2	1	1	9	1	1	1	1	1	1	1	1	1	1	1	1	1	1	1	1	1	1	1	1	1	1	1	1	1	1	1	1	1	1	1	1	1	1
0	0	0	1	1	1	3	0	3	1	1	1	1	1	1	30	1	1	3	1	4	1	2	1	1	1	1	1	2	2	1	4	5	4	1	1	1	1	1	1	2	2	2	2	2	2	2	2	2	1
0	0	0	1	1	1	3	0	3	1	2	3	1	1	1	5	1	1	1	1	1	1	1	1	1	1	1	1	1	1	1	1	1	1	1	1	1	1	1	1	1	1	1	1	1	1	1	1	1	1
0	0	0	1	2	1	3	0	3	1	1	3	1	1	1	30	1	1	1	1	3	1	1	1	1	1	1	1	1	1	1	1	3	1	1	1	1	1	1	1	1	1	1	1	1	1	1	1	1	1
0	0	0	1	2	1	3	0	3	1	4	3	4	4	2	5	1	1	1	1	1	1	1	1	1	1	1	1	1	1	1	1	1	1	1	1	1	1	1	1	1	1	1	1	1	1	1	1	1	1
0	0	0	1	2	1	3	0	1	1	2	1	1	1	1	8	1	1	1	4	1	1	4	1	1	1	1	1	1	1	1	1	1	1	1	1	1	1	1	1	1	1	1	1	1	1	1	1	1	1
0	0	0	1	1	1	3	0	4	1	1	1	2	2	1	6	1	1	1	5	1	1	1	1	1	1	1	1	1	1	1	1	1	1	1	1	1	1	1	1	1	1	1	1	1	1	1	1	1	1
0	0	0	1	2	1	2	1	4	1	1	1	1	1	1	9	1	1	1	1	1	1	1	1	1	1	1	1	1	1	1	1	1	1	1	1	1	1	1	1	1	1	1	1	1	1	1	1	1	1
0	0	0	1	1	1	2	0	2	1	1	1	1	1	1	12	1	1	1	1	1	1	1	1	1	1	1	1	1	1	1	1	1	1	1	1	1	1	1	1	1	1	1	1	1	1	1	1	1	1
0	0	0	1	1	1	3	0	2	1	1	1	1	1	1	30	1	1	1	1	1	1	1	1	1	1	1	1	1	1	1	1	1	1	1	1	1	1	1	1	1	1	1	1	1	1	1	1	1	1
0	0	0	1	1	1	3	0	4	1	1	1	1	1	1	10	1	1	1	2	4	1	1	4	4	2	4	1	1	1	1	1	1	1	1	1	1	1	1	1	1	1	1	1	1	1	1	1	1	1
0	0	0	1	1	1	3	0	3	3	4	2	3	2	3	7	5	1	1	1	1	1	3	2	4	1	1	4	1	4	3	5	1	1	1	1	1	4	1	1	1	1	1	5	5	1	1	1	1	1
0	0	0	1	2	1	2	0	4	1	1	1	1	1	1	5	1	1	1	1	1	1	1	1	1	1	1	1	1	1	1	1	1	1	1	1	1	1	1	1	1	1	1	1	1	1	1	1	1	1
0	0	0	1	1	1	3	0	2	1	1	1	1	1	1	7	1	1	1	1	1	1	1	1	1	1	1	1	1	1	1	1	1	1	1	1	1	4	4	4	1	1	1	1	1	1	4	4	4	4
0	0	0	1	1	0	3	0	4	1	1	1	1	1	1	9	1	1	1	4	1	1	1	1	1	1	1	1	1	2	1	4	1	4	1	1	1	1	4	1	4	4	3	2	2	4	2	1	1	1
0	0	0	1	2	1	2	1	4	3	1	1	1	1	1	6	1	1	1	2	1	1	1	1	1	1	1	1	1	1	1	1	1	1	1	1	1	1	1	1	1	1	1	1	1	1	1	1	1	1
0	0	0	1	1	1	3	0	4	1	1	2	3	2	1	13	5	1	5	1	1	5	5	5	5	5	5	1	5	3	1	4	1	5	1	1	5	1	2	3	5	5	3	5	5	5	3	1	1	1
0	0	0	1	1	1	3	0	3	4	2	3	4	1	4	0	2	4	3	3	5	5	4	5	5	5	5	1	5	4	4	1	5	5	5	5	4	4	5	5	3	3	5	4	5	2	4	3	5	1
0	0	0	1	1	1	3	0	3	1	1	1	1	1	1	6	1	1	1	1	1	1	1	1	1	1	1	1	1	1	1	1	1	1	1	1	1	1	1	1	1	1	1	1	1	1	1	1	1	1
0	0	0	1	2	1	3	0	2	1	1	2	4	1	1	5	4	2	2	1	1	2	4	2	2	2	1	3	2	3	2	2	1	1	2	1	1	3	1	2	3	2	3	2	2	1	1	1	1	1
0	0	0	1	1	1	3	0	2	3	4	4	3	4	3	8	2	3	1	1	1	1	3	3	1	1	2	4	1	3	2	1	1	1	1	1	1	5	3	1	1	1	1	5	5	2	1	1	1	1
0	0	0	1	2	1	2	1	4	1	1	1	1	1	1	5	5	1	1	1	1	1	1	1	1	1	1	1	4	1	1	1	1	1	1	1	5	1	1	1	1	1	1	1	1	1	1	1	1	1
0	0	0	1	2	1	2	0	4	1	1	1	1	1	1	6	1	3	1	1	1	2	1	1	1	1	1	1	1	1	1	1	1	1	1	1	1	1	1	1	1	1	1	2	1	1	1	1	1	1
0	0	0	1	2	1	3	0	2	2	1	4	3	4	3	0	1	1	4	3	5	5	1	4	1	3	4	4	2	4	3	5	5	5	1	5	3	1	5	4	2	1	5	5	1	3	1	1	5	1
0	0	0	1	1	1	3	0	4	1	2	2	2	1	1	2	1	1	1	1	1	1	1	1	1	1	1	1	1	1	1	1	1	1	1	1	1	1	1	1	1	1	1	1	1	1	1	1	1	1
0	0	1	1	1	1	3	0	2	1	1	1	1	2	4	9	1	1	4	1	1	1	1	1	1	4	1	4	4	4	4	1	1	4	1	1	4	4	4	4	4	4	4	1	1	1	1	1	1	1
0	0	1	2	2	1	1	1	2	1	1	1	1	1	1	5	1	1	1	1	1	1	1	1	1	1	1	1	1	1	1	1	1	1	1	1	1	1	1	1	1	1	1	1	1	1	1	1	1	1
0	0	1	1	2	1	3	0	3	2	4	4	4	1	1	8	2	1	1	1	2	1	1	1	1	1	1	1	1	1	2	1	1	1	1	1	1	1	1	1	1	1	1	1	1	1	1	1	1	1
0	0	1	1	2	0	3	0	4	2	2	1	1	1	2	10	1	1	1	1	1	1	1	1	1	1	1	1	1	1	1	1	1	1	1	1	1	1	1	1	1	1	1	1	1	1	1	1	1	1
0	0	1	1	2	0	3	0	4	1	2	3	1	1	1	4	2	4	1	1	1	2	1	2	4	1	1	2	5	3	2	1	1	1	1	1	1	2	1	1	1	1	1	1	2	2	1	1	1	1
0	0	1	1	2	1	3	0	3	3	3	1	1	1	2	7	1	1	1	1	1	1	4	1	1	1	1	1	1	2	1	1	1	1	1	1	1	1	1	1	1	1	1	1	1	1	1	1	1	1
0	0	1	1	2	0	2	1	3	1	2	3	2	2	2	5	1	1	1	1	1	1	1	1	1	1	1	1	1	1	1	1	1	1	1	1	1	1	1	1	1	1	1	1	2	1	1	1	1	1
0	0	1	1	1	1	3	0	2	2	2	2	1	1	1	4	1	1	1	1	1	1	1	1	1	1	1	1	1	1	1	1	1	1	1	1	1	1	5	1	1	1	1	1	1	1	1	1	1	1
0	0	1	1	1	1	3	0	4	1	1	1	1	1	1	6	1	1	1	1	1	1	1	1	1	1	1	1	1	1	1	1	1	1	1	1	1	1	1	1	1	1	1	1	1	1	1	1	1	1
0	0	1	1	2	1	2	1	2	2	3	3	2	2	1	30	3	4	1	4	3	3	3	4	1	4	1	4	4	3	4	3	1	4	3	3	3	3	2	1	1	1	1	1	1	2	3	3	5	1
0	0	1	1	1	1	3	0	4	1	1	1	1	1	1	7	1	1	1	1	1	1	1	1	1	1	1	1	1	1	1	1	1	1	1	1	1	1	1	1	1	1	1	1	1	1	1	1	1	1
0	0	1	1	1	1	3	0	4	1	1	1	2	1	1	9	1	1	1	1	1	1	1	1	1	1	1	1	1	1	1	1	1	1	1	1	1	1	1	1	1	1	1	1	1	1	1	1	1	1
0	0	1	1	1	1	3	0	3	1	1	1	1	1	1	6	1	1	1	1	1	1	1	1	1	1	1	1	1	1	1	1	1	1	1	1	1	1	1	1	1	1	1	1	1	1	1	1	1	1
0	0	1	1	1	1	3	0	3	1	2	2	1	1	1	10	1	1	1	1	1	1	1	1	1	1	1	1	1	1	1	1	1	1	1	1	1	1	1	1	1	1	1	1	1	1	1	1	1	1
0	0	1	1	2	1	2	1	4	3	1	3	1	1	3	9	1	1	1	1	1	1	1	1	1	1	1	1	1	1	1	1	1	1	1	1	1	1	1	1	1	1	1	1	1	1	1	1	1	1
0	0	1	1	2	1	3	0	2	3	1	2	1	1	1	10	1	1	1	1	1	1	1	1	5	1	1	1	1	1	1	1	1	1	1	1	1	1	1	1	1	1	1	1	1	1	1	1	1	1
0	0	1	1	2	1	3	0	1	1	1	1	1	1	1	12	1	1	1	1	1	1	1	1	1	1	1	1	1	1	1	1	1	1	1	1	1	1	1	1	1	1	1	1	1	1	1	1	1	1
0	0	1	1	2	1	3	0	4	1	1	1	2	1	1	7	2	1	1	1	1	1	1	1	1	1	1	4	1	1	1	1	1	1	1	2	1	1	1	1	1	1	1	1	1	1	1	2	1	1
0	0	1	1	2	0	3	0	1	1	1	1	1	1	1	30	1	1	1	1	1	1	1	1	1	1	1	1	1	1	1	1	1	1	1	1	1	1	1	1	1	1	5	1	1	1	1	1	5	1
0	0	1	1	2	0	3	0	1	2	1	1	2	1	1	6	1	1	1	1	1	1	1	1	1	1	1	1	1	1	1	1	1	1	1	1	1	1	1	1	1	1	1	1	1	1	1	1	1	1
0	0	1	3	1	1	3	0	4	2	1	1	2	1	3	8	3	1	2	1	1	1	5	4	2	5	5	5	2	5	3	5	5	5	2	5	3	5	5	2	5	1	4	5	5	5	3	5	3	1
0	0	1	3	1	0	3	0	3	1	1	1	1	1	1	10	1	1	1	1	1	1	1	1	1	1	1	1	1	1	1	1	1	1	1	1	1	1	1	1	1	1	1	1	1	1	1	1	1	1
0	0	1	3	0	0	3	0	1	2	1	2	3	1	2	7	1	1	1	1	4	1	1	1	1	2	1	2	4	2	2	1	1	1	1	4	2	1	1	1	1	1	1	1	1	1	1	1	1	1
0	0	1	1	1	1	2	1	4	2	1	2	3	1	1	8	1	1	1	1	1	1	1	1	1	1	1	1	1	1	1	1	1	1	1	1	1	1	1	1	1	1	1	1	1	1	1	1	1	1
0	0	1	1	1	1	3	0	4	1	4	4	4	2	1	6	2	2	2	1	2	3	4	2	1	1	3	1	1	2	1	1	1	1	1	1	1	4	1	1	1	1	1	4	1	1	1	1	2	1
0	0	1	1	1	1	3	0	1	3	1	1	2	1	1	4	1	1	1	1	1	1	1	1	1	1	1	1	1	1	1	1	1	1	1	1	1	1	1	1	1	1	1	1	1	1	1	1	1	1
0	0	1	1	1	1	3	0	1	3	1	1	2	1	1	8	1	1	1	1	1	1	1	1	1	1	1	1	1	1	1	1	1	1	1	1	1	1	1	1	1	1	1	1	1	1	1	1	1	1
0	0	1	1	1	1	3	0	4	1	1	1	1	1	2	9	1	1	1	4	1	1	1	1	1	1	1	1	1	1	1	1	1	1	1	1	1	1	1	1	1	1	1	1	1	1	1	1	1	1
0	0	1	1	1	1	3	0	4	1	1	1	2	1	1	8	1	1	1	1	1	1	1	1	1	1	1	1	1	1	1	1	1	1	1	1	1	1	1	1	1	1	1	1	1	1	1	1	1	1
0	0	1	1	1	1	3	0	4	2	1	2	2	1	1	9	1	1	1	1	1	1	1	1	1	1	1	1	1	1	1	1	1	1	1	1	1	1	1	1	1	1	1	1	1	1	1	1	1	1
0	0	1	1	1	1	3	0	3	1	1	2	1	1	1	9	1	1	1	1	1	1	1	1	1	1	1	1	1	1	1	1	1	1	1	1	1	1	1	1	1	1	1	1	1	1	1	1	1	1
0	0	1	1	1	1	3	0	2	1	2	3	2	1	2	30	1	2	1	1	1	1	1	1	1	1	1	1	1	1	1	1	1	1	1	1	1	1	1	1	1	1	1	1	1	1	1	1	1	1
0	0	1	1	1	1	3	0	2	1	1	2	3	1	1	8	1	1	4	1	1	1	1	1	1	1	1	1	1	1	1	1	1	1	1	1	1	1	1	1	1	1	1	1	1	1	1	1	1	1
0	0	1	1	1	0	3	0	3	1	1	2	2	2	1	9	3	2	4	1	1	2	4	4	4	4	1	4	4	4	4	4	1	5	3	4	4	1	1	1	1	1	2	5	5	5	5	4	5	1
0	0	1	1	2	1	2	1	4	1	1	2	1	1	1	6	1	1	1	1	1	1	1	1	1	1	1	4	2	1	1	1	1	1	1	1	1	2	1	1	1	1	1	2	1	1	1	1	1	1
0	0	1	1	2	1	2	1	4	3	1	1	1	1	1	9	1	1	1	1	1	1	1	1	1	1	1	1	2	1	1	1	1	1	1	4	1	1	1	1	1	1	1	1	1	1	1	1	1	1
0	0	1	1	2	1	2	1	3	1	1	1	2	1	1	9	5	1	1	1	1	1	1	1	1	1	1	1	1	1	1	1	1	1	1	1	1	1	1	1	1	1	1	1	1	1	1	1	1	1
0	0	1	1	2	1	3	0	4	1	1	1	2	1	1	6	1	1	1	1	1	1	1	1	1	1	1	1	1	1	1	1	1	1	1	1	1	1	1	1	1	1	1	1	1	1	1	1	1	1
0	0	1	1	2	1	3	0	4	1	2	1	1	1	2	6	1	1	1	1	1	1	1	1	1	1	1	1	1	1	1	1	1	1	1	1	1	1	1	1	1	1	1	1	1	1	1	1	1	1
0	0	1	1	2	0	2	0	4	1	1	3	2	1	1	5	4	3	1	1	4	1	1	1	1	1	1	1	1	1	1	1	1	1	1	1	1	1	1	1	1	1	1	1	1	1	1	1	1	1
0	0	1	1	2	0	3	0	3	3	2	2	4	2	3	30	3	2	3	2	2	4	3	1	1	4	3	5	4	5	1	5	1	4	5	2	1	4	1	3	3	1	1	1	1	1	4	1	1	1
0	0	1	1	0	0	3	0	4	1	1	1	1	3	1	6	1	1	1	1	1	1	1	1	1	1	1	1	1	1	1	1	1	1	1	1	1	1	1	1	1	1	1	1	1	1	1	1	1	1
0	0	1	1	1	1	3	0	4	1	1	1	1	1	2	9	1	1	1	1	1	1	3	1	1	1	1	4	1	1	1	2	1	1	1	2	1	2	1	1	1	1	1	2	2	1	1	1	1	1
0	0	1	1	2	1	2	1	3	2	1	1	2	1	1	6	1	3	1	1	1	1	4	1	1	1	4	4	4	3	3	1	1	1	1	1	1	1	1	1	1	1	1	4	4	3	1	1	1	1
0	0	1	1	2	1	3	0	3	2	1	1	2	1	1	8	1	1	1	1	2	1	1	1	1	1	1	1	1	1	1	1	1	1	1	1	1	1	1	1	1	1	1	1	1	1	1	1	1	1
0	0	1	1	2	1	3	0	4	1	1	1	1	4	1	7	5	1	1	4	4	1	5	5	1	5	5	3	1	1	4	5	1	4	1	1	1	5	1	1	1	1	1	1	1	1	5	5	5	1
0	0	1	1	2	1	3	0	3	1	1	2	2	1	1	7	1	1	1	1	1	1	1	1	1	1	1	1	1	1	1	1	1	1	1	1	1	1	1	1	1	1	1	1	1	1	1	1	1	1
0	0	1	1	1	1	2	1	4	2	1	1	1	1	1	8	1	1	1	1	1	1	1	1	1	1	1	3	1	2	3	5	1	3	1	1	4	4	5	1	1	1	1	2	1	1	1	1	1	1
0	0	1	1	1	1	3	0	2	1	1	1	1	1	1	30	1	1	1	1	1	1	1	1	1	1	1	1	1	1	1	1	1	1	1	1	1	1	1	1	1	1	1	1	1	1	1	1	1	1
0	0	1	1	1	1	3	0	4	1	1	1	1	1	1	5	2	2	2	1	1	2	4	2	1	4	2	1	4	5	1	5	2	4	4	2	2	1	4	1	1	1	2	4	5	5	1	2	4	1
0	0	1	1	1	1	3	0	4	1	1	2	1	1	1	7	1	1	1	1	1	1	1	1	1	1	1	1	1	1	1	1	1	1	1	1	1	1	1	1	1	1	1	1	1	1	1	1	1	1
0	0	1	1	1	1	3	0	3	1	1	1	1	1	1	30	1	1	1	1	5	1	1	1	1	1	1	1	1	1	1	1	1	1	1	1	1	1	1	1	1	1	1	1	1	1	1	1	1	1
0	0	1	1	1	1	3	0	3	1	2	3	3	1	3	7	3	3	1	1	1	1	1	1	1	1	1	1	1	1	1	1	1	1	1	1	1	1	1	1	1	1	1	3	3	3	1	1	1	1
0	0	1	1	1	1	3	0	3	1	1	1	1	1	1	8	1	1	1	1	1	1	1	1	1	1	1	1	1	1	1	1	1	1	1	1	1	1	1	1	1	1	1	1	1	1	1	1	1	1
0	0	1	1	1	0	3	0	2	1	1	1	2	1	1	8	1	1	1	1	1	1	1	1	1	1	1	1	1	1	1	1	1	1	1	1	1	1	1	1	1	1	1	1	1	1	1	1	1	1
0	0	1	1	1	0	3	0	1	2	1	1	1	1	1	9	1	1	1	1	1	1	1	1	1	1	1	1	1	5	1	1	1	1	1	1	1	1	1	1	1	1	1	1	1	1	1	1	1	1
0	0	1	1	1	0	3	0	2	1	1	1	1	1	2	7	1	1	1	1	1	1	1	1	1	1	1	1	1	1	1	1	1	1	1	1	1	1	1	1	1	1	1	1	1	1	1	1	1	1
0	0	1	1	2	1	1	1	4	1	1	1	2	1	1	4	1	1	1	1	1	1	1	1	1	1	1	2	1	1	1	1	1	1	1	1	1	1	1	1	1	1	1	2	1	1	1	1	1	1
0	0	1	1	2	1	2	1	4	1	2	1	1	1	1	7	1	2	1	2	1	2	2	4	3	4	4	4	4	4	5	2	1	5	4	4	1	1	4	4	4	4	2	2	4	4	2	4	4	1
0	0	1	1	2	1	2	1	4	3	1	2	1	2	1	5	1	1	1	1	1	1	1	1	1	1	1	1	1	1	1	1	1	1	1	1	1	1	1	1	1	1	1	1	1	1	1	1	1	1
0	0	1	1	2	1	2	1	3	1	1	1	1	1	1	8	1	1	1	1	1	1	1	1	1	1	1	1	4	1	1	1	1	1	1	1	1	3	1	1	1	1	1	1	1	1	1	1	1	1
0	0	1	1	2	1	2	1	4	3	1	1	2	1	4	7	1	1	2	1	1	1	2	1	1	1	4	5	2	2	4	1	2	2	1	1	1	5	1	1	1	1	1	5	4	1	1	1	2	1
0	0	1	1	2	1	2	1	4	2	1	1	1	1	1	7	3	2	1	1	1	1	1	1	1	1	1	1	1	1	1	1	1	1	1	1	1	1	1	1	1	1	1	2	1	1	1	1	1	1
0	0	1	1	2	1	3	0	4	1	1	1	1	1	1	8	1	1	1	1	1	1	1	1	1	1	1	5	1	1	1	1	1	1	1	1	1	1	1	1	1	1	1	1	1	1	1	1	1	1
0	0	1	1	2	1	3	0	4	1	1	1	2	1	2	6	1	1	1	1	1	1	1	1	1	1	1	5	1	1	1	1	1	1	1	1	2	1	1	1	1	1	1	1	1	1	1	1	1	1
0	0	1	1	2	1	3	0	4	1	1	1	2	1	1	12	1	1	1	1	1	1	1	1	1	1	1	1	1	1	1	1	1	1	1	1	1	1	1	1	1	1	1	1	1	1	1	1	1	1
0	0	1	1	2	1	3	0	3	1	2	3	1	1	1	7	1	1	1	1	1	1	1	1	1	1	1	1	1	1	1	1	1	1	1	1	1	1	1	1	1	1	1	1	1	1	1	1	1	1
0	0	1	1	2	1	3	0	2	1	1	1	1	1	1	0	1	1	1	1	1	1	1	1	1	1	1	1	1	1	1	1	1	1	1	1	1	1	1	1	1	1	1	1	1	1	1	1	1	1
0	0	1	1	2	1	3	0	3	1	1	1	1	1	1	9	1	1	1	1	1	1	1	1	1	1	1	1	1	1	1	1	1	1	1	1	1	1	1	1	1	1	1	1	1	1	1	1	1	1
0	0	1	1	2	1	3	0	3	3	1	1	1	1	1	0	1	1	1	1	1	1	1	1	1	1	1	1	1	1	1	1	1	1	1	1	1	1	1	1	1	1	1	1	1	1	1	1	1	1
0	0	1	1	2	1	3	0	3	4	3	1	1	1	1	30	1	2	1	1	1	1	1	1	1	1	1	1	1	1	1	1	1	1	1	1	1	1	1	1	1	1	1	1	1	1	1	1	1	1
0	0	1	1	2	1	3	0	4	1	1	2	2	1	1	5	1	1	1	1	1	1	1	1	1	1	1	1	1	1	1	1	1	1	1	1	1	1	1	1	1	1	1	1	1	1	1	1	1	1
0	0	1	1	2	0	3	0	4	1	1	1	1	1	1	7	1	1	1	1	1	1	1	1	1	1	1	1	5	1	1	1	1	1	1	1	1	1	1	1	1	1	1	1	1	1	1	1	1	1
0	0	1	1	2	0	3	0	4	2	2	4	3	2	3	4	2	2	1	1	1	1	1	1	1	1	1	1	1	1	1	1	1	1	1	1	1	1	1	1	1	1	1	1	1	1	1	1	1	1
0	0	1	1	2	0	3	0	4	1	1	1	1	1	1	9	1	1	1	1	2	1	1	1	1	1	1	1	1	1	1	1	1	1	1	1	1	1	1	1	1	1	1	1	1	1	1	1	1	1
0	0	1	2	1	0	3	0	4	1	1	1	2	1	1	7	1	1	1	1	1	1	1	1	1	1	1	1	1	1	1	1	1	1	1	1	1	1	1	1	1	1	1	1	1	1	1	1	1	1
0	0	1	1	1	1	3	0	3	2	1	1	1	1	1	8	1	1	1	3	1	1	1	1	1	1	1	5	1	1	1	1	1	1	1	1	1	1	1	1	1	1	1	1	1	1	1	1	1	1
0	0	1	1	1	1	3	0	2	1	1	2	1	1	1	10	1	1	1	1	1	1	1	1	1	1	1	1	1	1	1	1	1	1	1	1	1	1	1	1	1	1	1	1	1	1	1	1	1	1
0	0	1	1	1	1	3	0	2	3	1	2	1	1	1	6	2	2	1	1	1	1	5	1	2	1	5	2	1	1	1	1	1	1	1	1	1	2	1	1	1	1	1	2	1	1	1	1	1	1
0	0	1	1	2	1	2	0	4	1	1	1	1	1	1	8	1	5	1	4	1	1	1	1	1	1	1	1	1	1	1	1	1	1	1	1	1	1	1	1	5	1	1	1	1	1	1	1	1	1
0	0	1	1	2	1	3	0	3	2	1	2	1	2	1	10	1	1	1	4	1	1	1	1	1	1	1	1	1	1	1	1	1	1	1	1	1	1	1	1	1	1	1	1	1	1	1	1	1	1
0	0	1	1	2	1	3	0	4	1	2	2	2	2	1	5	1	1	1	1	1	1	1	1	1	1	1	1	1	1	1	1	1	1	1	1	1	1	1	1	1	1	1	1	1	1	1	1	1	1
0	0	1	1	2	0	3	0	1	1	1	2	1	2	3	4	1	1	2	2	1	1	1	2	1	1	2	1	2	1	1	1	2	1	1	2	1	1	1	1	2	1	2	2	2	1	2	1	1	1
0	0	1	1	1	1	1	1	4	3	4	3	1	1	1	0	1	1	1	1	1	1	1	1	1	1	1	1	1	3	1	2	1	1	1	1	1	5	1	1	1	1	1	1	5	1	1	1	1	1
0	0	1	1	1	1	3	0	2	1	1	1	1	1	1	8	1	1	1	1	1	1	1	1	1	1	1	1	1	1	1	1	1	1	1	1	1	1	1	1	1	1	1	1	1	1	1	1	1	1
0	0	1	1	1	1	3	0	4	1	1	3	3	1	1	4	1	1	1	1	1	1	1	1	1	1	1	1	1	1	1	1	1	1	1	1	1	1	1	1	1	1	1	1	1	1	1	1	1	1
0	0	1	1	1	1	3	0	2	1	1	1	1	1	1	30	1	1	1	1	1	1	1	1	1	1	1	1	1	1	1	1	1	1	1	1	1	1	1	1	1	1	1	1	1	1	1	1	1	1
0	0	1	1	2	1	2	1	4	2	1	3	2	1	1	8	1	1	1	1	1	1	1	1	1	1	1	1	1	1	1	1	1	1	1	1	1	1	1	1	1	1	1	1	1	5	1	1	1	1
0	0	1	1	2	1	3	0	4	2	1	1	1	1	1	10	1	1	1	1	1	1	1	1	1	1	1	1	1	1	1	1	1	1	1	1	1	1	1	1	1	1	1	1	1	1	1	1	1	1
0	0	1	1	1	1	3	0	3	2	1	1	1	1	1	30	1	1	1	1	1	1	1	1	1	1	1	1	1	1	1	1	1	1	1	1	1	1	1	1	1	1	1	1	1	1	1	1	1	1
0	0	1	1	2	1	3	0	4	1	1	2	2	1	1	6	1	1	1	1	1	1	1	1	1	1	1	1	1	1	1	1	1	1	1	1	1	1	1	1	1	1	1	1	1	1	1	1	1	1
0	0	1	1	2	1	3	0	3	1	2	1	2	1	1	7	2	1	2	1	2	1	1	1	1	1	2	1	1	1	1	1	1	1	1	1	1	1	1	1	1	1	1	1	1	1	1	1	1	1
0	0	1	1	1	1	3	0	4	1	1	1	1	1	1	7	1	1	1	2	1	1	1	1	1	1	1	1	1	2	1	1	1	1	1	1	1	1	1	1	1	1	1	1	1	1	1	1	1	1
0	0	1	4	2	0	3	0	3	1	3	3	2	2	1	4	5	1	1	4	2	1	4	4	1	1	2	3	5	5	1	5	1	5	2	3	5	5	2	1	1	1	1	5	5	5	5	5	1	1
0	0	1	1	1	1	1	1	3	1	1	1	1	1	1	8	1	1	1	1	4	1	1	1	1	1	1	1	1	1	1	1	1	1	1	1	1	1	1	1	1	1	1	1	1	1	1	1	1	1
0	0	1	1	1	1	3	0	3	1	1	3	3	1	1	5	2	2	1	1	3	2	5	2	2	5	5	1	3	2	1	1	1	3	1	2	2	5	3	1	5	1	1	5	5	5	3	3	1	2
0	0	1	1	2	1	2	1	4	2	4	1	1	3	1	7	1	1	1	1	1	1	3	1	1	1	1	1	1	1	1	1	1	1	1	1	1	1	1	1	1	1	1	1	1	1	1	1	1	1
0	0	1	1	1	1	3	0	2	1	1	1	1	1	1	3	3	3	1	1	1	1	2	1	1	1	1	1	1	1	1	1	1	1	1	1	1	1	1	1	1	1	1	2	1	1	1	1	1	1
0	0	1	1	2	0	2	1	3	2	4	1	1	1	1	6	1	1	1	1	1	1	1	1	1	1	1	1	1	1	1	1	1	1	1	1	1	1	1	1	1	1	1	1	1	1	1	1	1	1
0	0	1	1	1	1	2	1	4	1	4	4	4	4	4	5	1	1	1	1	1	1	1	1	1	1	1	1	1	1	1	1	1	1	1	1	1	1	1	1	1	1	1	1	1	1	1	1	1	1
0	0	1	1	2	1	3	0	3	1	2	2	1	2	3	3	1	1	1	4	1	1	1	1	1	1	1	1	1	1	1	1	3	1	1	2	4	2	1	1	4	1	1	2	3	1	1	1	1	3
0	0	1	1	2	1	3	0	2	4	4	3	4	3	3	7	5	3	1	4	1	1	4	1	3	4	2	1	5	1	5	1	1	2	2	3	2	4	3	3	1	4	1	5	3	3	2	1	4	1
0	0	1	1	1	1	2	1	3	3	3	2	4	4	3	12	1	1	1	1	1	1	1	1	1	1	1	1	1	1	1	1	1	1	1	1	1	1	1	1	1	1	1	1	1	1	1	1	1	1
0	0	2	1	1	1	3	0	2	1	2	1	1	1	1	8	1	1	1	4	4	1	1	1	1	1	5	4	4	1	4	4	1	1	1	4	4	1	1	1	1	1	1	1	1	1	1	1	1	1
0	0	2	1	2	1	2	1	4	1	1	1	1	1	2	30	1	1	1	1	1	1	1	1	1	1	1	1	1	1	1	1	1	1	1	1	1	1	1	1	1	1	1	1	1	1	1	1	1	1
0	0	2	1	1	1	3	0	3	1	1	2	1	1	1	8	1	1	1	1	1	1	1	1	1	1	1	1	1	1	1	1	1	1	1	1	1	1	1	1	1	1	1	1	1	1	1	1	1	1
0	0	2	1	1	1	3	0	0	2	4	3	2	1	2	5	5	1	1	3	2	1	1	1	1	1	1	1	1	1	1	1	1	1	1	1	1	1	1	1	1	1	1	1	1	1	1	1	1	1
0	0	2	1	1	1	3	0	2	1	1	1	2	1	1	9	1	1	1	1	1	1	1	1	1	1	1	1	1	1	1	1	1	1	1	1	1	1	1	1	1	1	1	1	1	1	1	1	1	1
0	0	2	1	1	1	3	0	3	4	2	2	2	2	4	11	3	3	1	1	1	1	2	1	1	1	1	1	1	2	2	2	1	1	1	1	1	2	1	1	1	1	1	5	5	5	1	1	1	1
0	0	2	1	1	1	3	0	4	1	1	1	1	1	1	9	1	1	1	1	2	1	1	1	1	1	1	1	1	1	1	1	2	1	1	1	1	2	1	1	1	1	1	5	1	2	1	1	1	1
0	0	2	1	1	0	3	0	4	3	2	1	1	1	1	30	1	1	1	1	1	1	1	1	1	1	1	1	1	1	1	1	1	1	1	1	1	1	1	1	1	1	1	1	1	1	1	1	1	1
0	0	2	1	1	0	3	0	3	1	1	1	2	2	1	8	1	1	1	1	1	1	1	1	1	1	2	1	1	1	1	1	1	1	1	1	1	1	1	1	1	1	1	1	1	1	1	1	1	1
0	0	2	1	2	1	3	0	1	1	1	1	2	2	1	7	1	1	1	1	2	1	1	1	1	1	1	1	1	1	1	1	1	1	1	1	1	1	1	1	1	1	1	1	1	1	1	1	1	1
0	0	2	1	2	1	3	0	4	2	1	1	1	1	1	9	1	1	1	1	1	1	1	1	1	1	1	1	1	1	1	1	1	1	1	1	1	1	1	1	1	1	1	1	1	1	1	1	1	1
0	0	2	3	1	0	3	0	3	1	1	4	4	1	1	11	1	1	1	1	1	1	1	1	1	1	1	1	1	1	1	1	1	1	1	1	1	1	1	1	1	1	1	1	2	1	1	1	1	1
0	0	2	1	1	1	3	0	3	1	3	3	2	3	2	7	1	1	1	1	1	1	1	1	1	1	1	1	1	1	1	1	1	1	1	1	1	1	1	1	1	1	1	1	1	1	1	1	1	1
0	0	2	1	1	0	3	0	2	4	1	1	2	1	4	7	1	1	1	3	1	4	2	1	1	3	5	1	5	3	4	5	3	2	5	5	4	1	1	4	1	2	3	5	4	2	1	5	4	3
0	0	2	1	2	1	3	0	4	1	1	1	1	1	1	8	1	1	1	1	1	1	1	1	1	1	1	1	1	1	1	1	1	1	1	1	1	1	1	1	1	1	1	1	1	1	1	1	1	1
0	0	2	1	2	1	3	0	2	2	2	1	1	2	1	9	2	1	1	2	2	2	2	1	1	1	2	2	2	1	2	1	2	1	1	1	1	2	1	1	1	1	1	4	1	4	1	1	1	1
0	0	2	1	1	1	3	0	4	1	1	1	1	1	4	7	1	1	1	1	1	1	1	1	1	1	1	1	1	1	1	1	1	1	1	1	1	1	1	1	2	1	1	5	1	3	1	3	1	1
0	0	2	1	1	1	3	0	1	2	4	1	1	1	1	3	1	1	1	1	1	1	1	1	1	1	1	1	1	1	1	1	1	1	1	1	1	1	1	1	1	1	1	1	1	1	1	1	1	1
0	0	2	1	1	0	3	0	4	2	1	1	1	1	1	8	1	1	1	1	1	1	1	1	1	1	1	1	1	1	1	1	1	1	1	1	1	1	1	1	1	1	1	1	1	1	1	1	1	1
0	0	2	1	2	1	3	0	3	2	1	2	1	1	1	8	2	2	3	2	1	2	4	1	2	1	4	2	1	1	1	1	1	3	2	1	1	2	1	1	1	1	2	2	2	2	1	1	1	1
0	0	2	1	1	1	3	0	3	3	1	4	4	3	1	6	1	1	1	2	1	1	1	1	1	1	1	1	1	1	1	1	1	1	1	1	1	1	1	1	1	1	1	1	1	1	1	1	1	1
0	0	2	1	2	0	3	0	4	1	1	1	2	1	1	13	1	1	1	1	1	1	1	1	1	1	1	1	1	1	1	1	1	1	1	1	1	1	1	1	1	1	1	1	1	1	1	1	1	1
0	0	2	1	1	1	3	0	2	3	4	4	4	4	4	6	1	1	1	1	1	1	1	1	1	1	1	1	1	1	1	1	1	1	1	1	1	1	1	1	1	1	1	1	1	1	1	1	1	1
0	0	2	1	1	1	3	0	3	2	2	2	2	1	2	8	4	4	1	1	1	3	3	3	2	1	1	5	1	1	1	5	1	1	1	1	1	1	1	1	5	1	1	5	5	3	1	1	1	1
0	0	2	1	1	0	3	0	0	1	1	1	1	1	1	6	1	3	1	3	1	3	1	2	3	3	3	3	2	1	1	1	1	1	1	3	1	3	1	3	1	1	3	4	3	1	1	1	1	1
0	0	3	1	1	1	3	0	3	2	4	4	4	1	1	15	1	2	1	1	1	2	2	2	2	1	2	2	2	2	2	1	1	1	2	1	1	2	1	1	1	1	1	2	5	5	1	1	1	1
0	0	3	1	1	0	3	0	4	1	1	1	1	1	1	7	1	1	4	1	1	4	1	1	1	1	1	1	1	1	1	1	1	1	1	1	1	5	4	1	1	2	1	4	4	1	4	4	1	1
0	0	3	1	2	1	3	0	1	4	4	4	4	4	4	6	1	1	1	1	1	1	1	1	1	1	1	1	1	1	1	1	1	1	1	1	1	1	1	1	1	1	1	1	1	1	1	1	1	1
0	0	3	3	2	1	3	0	1	2	1	1	2	1	2	11	5	2	2	3	1	1	1	1	1	1	1	1	1	1	1	1	1	1	1	5	1	5	1	1	1	1	1	1	1	1	1	1	1	1
0	0	3	1	1	0	3	0	1	1	3	2	1	1	2	1	1	1	1	1	1	1	1	1	1	1	1	1	1	1	1	1	1	1	1	1	1	1	1	1	1	1	1	1	1	1	1	1	1	1
0	0	4	1	2	1	3	0	4	1	1	2	1	1	3	6	1	3	1	1	1	1	1	1	1	1	1	1	1	1	3	1	1	5	1	1	1	1	1	1	1	1	1	1	1	1	1	1	1	1
0	0	4	1	1	1	3	0	2	2	1	2	2	1	1	7	1	1	1	3	5	1	1	1	1	1	1	1	1	1	1	1	1	1	1	1	1	1	1	1	1	1	1	1	1	1	1	1	1	1
0	0	4	1	2	1	3	0	3	3	1	1	1	1	1	8	1	1	1	1	3	1	1	1	1	1	2	1	1	1	1	1	1	1	1	1	1	1	1	1	1	1	1	1	1	1	1	1	1	1
0	0	1	1	2	1	1	1	3	1	2	4	2	1	2	7	1	1	1	1	5	1	2	1	3	3	3	1	2	1	2	5	2	4	5	3	1	2	5	1	2	3	3	5	1	1	1	1	2	4
0	1	0	1	2	0	3	0	0	1	1	1	4	1	4	9	1	1	1	1	1	1	1	1	1	1	1	1	1	1	1	1	1	1	1	1	1	1	1	1	1	1	1	1	1	1	1	1	1	1
0	1	1	1	1	1	3	0	3	1	2	1	1	1	1	8	1	1	1	1	1	4	4	1	5	1	1	1	1	1	1	1	1	1	1	1	1	1	1	1	1	1	1	1	1	1	1	1	1	1
0	1	1	1	2	1	3	0	2	1	1	2	1	4	1	9	1	1	1	4	1	3	1	1	1	4	1	1	1	1	1	1	1	1	1	1	1	4	1	1	1	1	1	1	1	1	1	1	1	1
0	1	2	1	2	1	2	0	4	3	2	1	2	1	1	7	1	1	1	1	1	1	1	1	1	1	1	1	1	1	1	1	1	1	1	1	1	1	1	1	1	1	1	1	1	1	1	1	1	1
0	1	2	1	1	1	3	0	3	2	2	3	3	2	2	8	1	1	1	1	1	1	1	1	1	1	1	3	1	1	1	1	1	1	1	1	1	3	1	1	1	1	1	3	1	1	1	1	1	1
0	1	2	1	1	1	2	1	4	1	1	2	3	2	1	9	1	1	1	1	1	1	1	1	1	1	1	1	1	1	1	1	1	1	1	1	1	1	1	1	1	1	1	1	1	1	1	1	1	1
0	1	2	1	2	1	3	0	4	3	2	1	1	2	4	7	1	1	1	1	1	1	1	1	1	1	1	1	1	1	1	1	1	1	1	1	1	5	1	1	1	1	1	5	1	1	1	1	1	1
0	1	2	1	2	1	2	1	4	1	2	1	3	2	2	30	1	1	1	1	1	1	1	1	1	1	1	1	1	1	1	1	1	1	1	1	1	1	1	1	1	1	1	1	1	1	1	1	1	5
0	1	2	1	1	1	3	0	3	1	1	2	1	1	1	6	2	2	2	1	1	1	4	1	1	1	2	1	2	2	2	1	1	1	1	1	1	4	1	1	1	1	1	1	1	1	1	1	1	1
0	1	2	1	1	1	3	0	3	1	1	2	1	1	1	6	2	2	2	1	1	1	4	1	1	1	2	1	2	2	2	1	1	1	1	1	1	4	1	1	1	1	1	1	1	1	1	1	1	1
0	1	2	1	2	0	3	0	3	1	1	1	1	1	1	7	1	1	1	1	1	1	1	1	1	1	1	1	1	1	1	1	1	1	1	1	1	1	1	1	1	1	1	1	1	1	1	1	1	1
0	1	3	1	1	1	3	0	1	1	4	2	2	2	4	30	4	5	2	1	1	1	1	1	1	1	1	1	1	1	1	1	1	1	1	1	1	1	1	1	1	1	1	1	1	1	1	1	1	1
0	1	3	1	1	1	3	0	2	1	1	2	1	2	1	7	2	2	1	1	2	1	2	2	2	2	1	2	2	2	2	2	1	2	1	2	2	2	1	2	1	1	1	3	4	2	2	2	2	1
0	1	3	1	1	1	3	0	2	1	1	2	1	2	1	7	2	2	1	1	2	1	2	2	2	2	1	2	2	2	2	2	1	2	1	2	2	2	1	2	1	1	1	3	4	2	2	2	2	1
0	1	1	1	1	0	3	0	3	2	3	2	4	4	2	8	1	1	1	1	1	1	1	1	1	1	1	2	3	2	4	1	1	1	1	1	2	4	1	1	1	1	1	1	1	1	2	1	1	1
0	1	1	1	2	0	3	0	3	1	3	4	4	2	2	6	2	1	1	1	1	2	3	3	2	3	1	1	5	5	1	3	1	5	1	2	3	1	3	1	1	1	1	3	3	3	2	2	2	1
0	1	1	1	2	0	3	0	3	1	3	4	4	2	2	6	2	1	1	1	1	2	3	3	2	3	1	1	5	5	1	3	1	5	1	2	3	1	3	1	1	1	1	3	3	3	2	2	2	1
0	1	1	1	2	1	2	1	3	1	1	1	1	2	3	8	1	1	1	1	1	1	1	1	1	1	1	1	1	1	1	1	1	1	1	1	1	1	1	1	1	1	1	1	1	1	1	1	1	1
0	1	1	1	1	0	3	0	2	1	3	2	4	2	1	6	1	1	1	1	1	1	1	1	1	1	1	1	1	1	1	1	1	1	1	1	1	1	1	1	1	1	1	1	1	1	1	1	1	1
0	1	1	1	2	1	2	1	4	1	1	1	2	3	1	8	1	1	1	1	1	1	1	1	1	1	1	1	1	1	1	1	1	1	1	1	1	1	1	1	1	1	1	2	1	1	1	1	1	1
0	1	1	1	2	1	2	1	4	1	1	1	1	1	1	9	1	1	1	1	1	1	1	1	1	1	1	1	1	1	1	1	1	1	1	1	1	1	1	1	1	1	1	1	1	1	1	1	1	1
0	1	1	1	2	1	3	0	3	1	2	2	1	2	2	9	1	1	1	1	1	1	1	1	1	1	1	1	1	1	1	1	1	1	1	1	1	1	1	1	1	1	1	1	1	1	1	1	1	1
0	1	1	1	2	1	3	0	4	1	1	1	1	1	1	6	1	1	1	1	1	1	1	1	1	1	1	1	1	1	1	1	1	1	1	1	1	1	1	1	1	1	1	1	1	1	1	1	1	1
0	1	1	1	2	1	3	0	2	1	2	1	1	3	1	5	2	2	1	1	1	1	1	2	1	1	1	1	3	2	1	1	1	1	4	1	1	1	1	1	2	1	1	2	1	1	1	1	1	1
0	1	1	1	2	1	3	0	2	1	2	1	1	3	1	5	2	2	1	1	1	1	1	2	1	1	1	1	3	2	1	1	1	1	4	1	1	1	1	1	2	1	1	2	1	1	1	1	1	1
0	1	1	1	2	1	3	0	3	1	1	2	3	4	4	7	1	1	1	1	1	1	2	1	1	1	2	4	1	2	1	2	2	2	2	1	2	2	2	2	4	2	3	4	2	4	2	2	4	1
0	1	2	1	2	1	3	0	2	2	1	1	2	1	1	6	1	1	1	1	1	1	1	1	1	1	1	1	1	1	1	1	1	1	1	1	1	1	1	1	1	1	1	3	1	3	1	1	1	1
0	1	2	1	1	0	3	0	4	1	3	2	3	1	1	8	2	2	1	1	1	2	2	5	3	2	1	1	2	2	1	1	1	5	1	2	1	2	2	1	1	1	1	2	1	2	2	2	2	1
0	1	2	1	1	1	3	0	2	1	2	1	1	1	1	7	1	1	1	5	5	1	5	5	1	1	1	1	1	1	1	1	1	1	1	1	1	1	1	1	1	1	1	1	1	1	1	1	1	1
0	1	2	1	2	1	2	0	4	3	4	4	4	3	4	6	5	5	4	5	2	5	2	5	5	1	4	1	5	5	1	4	2	5	5	1	1	1	5	5	5	2	5	5	5	5	5	5	5	1
0	1	2	1	2	1	3	0	4	1	1	3	2	1	1	7	1	1	1	1	1	1	1	1	1	1	1	1	1	1	1	1	1	1	1	1	1	1	1	1	1	1	1	1	1	1	1	1	1	1
0	1	2	1	1	1	3	0	1	1	1	1	2	1	2	7	2	2	1	1	4	2	1	1	1	2	1	2	2	4	2	3	1	4	5	1	1	2	2	1	1	1	1	2	2	2	2	2	2	2
0	1	2	1	2	1	2	0	4	2	1	1	2	1	2	4	1	1	1	1	1	1	4	1	1	1	1	4	1	1	3	1	1	1	1	1	1	3	1	1	1	1	1	5	4	3	1	1	1	1
0	1	2	1	2	1	3	0	3	1	1	1	2	3	4	9	1	1	1	1	1	1	1	1	1	1	1	1	1	1	1	1	1	1	1	1	1	1	1	1	1	1	1	1	1	4	1	1	1	4
0	1	2	1	1	1	3	0	3	1	1	1	1	1	1	6	1	1	1	1	1	1	1	1	1	1	1	1	1	1	1	1	1	1	1	1	1	1	1	1	1	1	1	1	1	1	1	1	1	1
0	1	2	1	1	1	3	0	3	2	4	3	3	1	1	7	1	1	1	1	1	1	1	1	1	1	1	1	1	1	1	1	1	1	1	1	1	1	1	1	1	1	1	1	1	1	1	1	1	1
0	1	2	1	1	1	2	1	2	3	1	2	3	4	3	9	1	1	1	1	1	1	1	1	1	1	1	2	1	2	1	1	1	1	1	1	1	1	1	1	1	1	1	1	1	1	1	1	1	1
0	1	2	1	1	1	3	0	2	2	2	2	2	2	1	7	1	1	1	3	3	3	3	3	3	3	3	3	3	3	1	1	1	1	1	1	1	1	3	1	3	3	1	1	1	1	1	1	1	1
0	1	2	1	1	1	3	0	3	1	1	1	1	1	1	9	1	1	4	1	1	1	1	3	3	4	1	1	1	1	1	1	1	1	1	1	1	1	1	1	5	3	1	1	1	1	1	1	1	1
0	1	2	1	1	1	3	0	2	1	2	1	1	1	1	8	1	1	1	1	1	1	1	1	1	1	1	1	1	1	1	1	1	1	1	1	1	1	1	1	1	1	1	1	1	1	1	1	1	1
0	1	2	1	1	1	3	0	1	4	2	1	1	1	1	6	1	1	1	2	1	1	1	1	1	1	1	1	1	1	1	1	1	1	1	1	1	1	1	1	1	1	1	1	1	1	1	1	1	1
0	1	2	1	1	1	3	0	4	1	1	2	1	2	1	7	1	1	1	1	2	1	1	1	1	1	1	1	1	1	1	1	1	1	1	1	1	1	1	1	1	1	1	1	1	1	1	1	1	1
0	1	2	1	1	1	3	0	4	1	2	1	1	1	1	12	1	1	1	1	1	1	1	1	1	1	1	1	1	1	1	1	1	1	1	1	1	4	1	1	1	1	1	1	1	1	1	1	1	1
0	1	2	1	1	1	3	0	2	2	1	1	1	1	2	30	1	1	1	1	1	1	1	1	1	1	1	1	1	1	1	1	1	1	1	1	1	1	1	1	1	1	1	1	1	1	1	1	1	1
0	1	2	1	1	1	3	0	2	1	1	4	1	1	1	6	1	1	1	1	1	1	1	1	1	1	1	1	1	1	1	1	1	1	1	1	1	1	1	1	1	1	1	1	1	1	1	1	1	1
0	1	2	1	1	1	3	0	2	1	1	4	1	1	1	6	1	1	1	1	1	1	1	1	1	1	1	1	1	1	1	1	1	1	1	1	1	1	1	1	1	1	1	1	1	1	1	1	1	1
0	1	2	1	1	1	3	0	1	1	1	1	1	2	1	6	1	1	1	1	4	1	1	1	1	1	1	4	1	1	1	1	1	1	1	1	1	1	1	1	1	1	1	1	1	1	1	1	1	1
0	1	2	1	1	1	3	0	4	2	4	4	4	3	4	7	1	1	4	1	2	4	4	4	5	1	4	1	2	1	1	1	1	1	1	1	1	1	4	1	1	1	1	1	1	1	1	1	1	1
0	1	2	1	2	1	2	1	4	3	1	4	4	4	4	30	1	1	1	1	1	1	1	1	1	1	1	1	1	2	1	1	1	1	1	1	1	1	1	1	1	1	1	1	1	1	1	1	1	1
0	1	2	1	2	1	2	1	4	4	1	4	2	1	1	8	1	1	1	1	1	1	1	1	1	1	1	5	5	1	1	5	1	1	1	5	5	1	1	1	1	1	1	1	1	1	1	1	1	1
0	1	2	1	2	1	3	0	4	2	2	1	1	1	1	4	4	4	4	4	1	1	1	1	5	1	1	1	1	1	1	1	1	1	1	1	1	1	1	5	5	5	4	5	5	1	1	1	1	1
0	1	2	1	2	1	3	0	3	1	1	4	1	2	1	8	1	1	1	1	1	1	1	1	1	1	1	1	1	1	1	1	1	1	1	1	1	1	1	1	1	1	1	1	1	1	1	1	1	1
0	1	2	1	2	1	3	0	3	1	1	1	1	1	1	30	1	1	1	1	1	1	1	1	1	1	1	1	1	1	1	1	1	1	1	1	1	1	1	1	1	1	1	1	1	1	1	1	1	1
0	1	2	1	2	1	3	0	3	1	1	2	1	1	1	7	1	1	1	1	1	1	1	1	1	1	1	1	1	1	1	1	1	1	1	1	1	1	1	1	1	1	1	1	1	1	1	1	1	1
0	1	2	1	2	1	3	0	3	1	1	3	1	1	3	8	2	1	1	1	1	1	1	1	1	1	1	1	1	1	1	1	1	1	1	1	1	2	1	1	1	1	1	1	1	1	1	1	1	1
0	1	2	1	2	0	3	0	3	1	1	1	1	1	1	5	1	1	1	2	1	1	1	1	1	1	1	1	1	1	1	1	1	1	1	1	1	1	1	1	1	1	1	1	1	1	1	1	1	1
0	1	2	1	2	0	3	0	3	1	1	1	2	1	1	15	1	1	1	1	1	1	1	1	1	1	1	1	1	1	1	1	1	1	1	1	1	1	1	1	1	1	1	1	1	1	1	1	1	1
0	1	2	1	2	0	3	0	2	1	1	1	1	1	1	5	1	1	1	1	1	1	1	1	1	1	1	1	1	1	1	1	2	2	2	2	1	4	2	2	1	2	2	2	1	1	1	1	1	1
0	1	2	1	2	0	3	0	2	2	1	2	1	1	1	9	1	1	1	1	1	1	1	1	1	1	1	1	1	1	1	1	1	1	1	1	1	1	1	1	1	1	1	1	1	1	1	1	1	1
0	1	2	1	2	0	3	0	4	1	1	2	1	1	2	9	1	5	5	3	1	2	4	4	4	5	2	4	2	5	3	2	4	3	1	2	1	1	1	1	1	1	1	1	1	1	1	1	1	1
0	1	2	1	1	1	3	0	4	1	3	4	3	1	2	7	1	1	1	1	1	1	1	1	1	1	1	1	1	1	1	1	1	1	1	1	1	1	1	1	1	1	1	1	1	1	1	1	1	1
0	1	2	1	1	1	3	0	3	1	1	1	1	1	2	7	1	1	1	1	1	1	1	1	1	1	1	1	1	1	1	1	1	1	1	1	1	1	1	1	1	1	1	1	1	1	1	1	1	1
0	1	2	1	1	1	3	0	2	3	2	3	4	1	2	30	3	1	1	1	1	1	1	1	1	1	3	1	1	1	1	1	1	1	1	1	1	1	1	1	1	1	1	1	1	1	1	1	1	1
0	1	2	1	1	1	3	0	4	2	1	1	2	1	1	7	3	1	1	1	1	2	4	1	1	1	4	1	1	1	1	2	1	1	1	1	1	2	2	1	1	2	1	1	1	1	1	1	1	1
0	1	2	1	1	1	3	0	2	2	4	4	2	2	1	9	5	3	1	3	5	5	5	3	2	5	3	3	3	5	3	3	2	4	4	4	4	2	5	2	4	4	2	4	4	4	4	4	4	1
0	1	2	1	1	1	3	0	4	1	1	1	2	1	1	8	1	5	5	5	5	4	1	5	5	2	2	5	4	5	5	3	2	5	5	3	5	5	5	5	5	3	5	1	1	1	1	1	1	1
0	1	2	1	1	1	3	0	4	3	2	2	2	3	3	6	1	1	1	1	1	1	1	1	1	1	1	1	1	1	1	1	1	1	1	1	1	1	1	1	1	1	1	1	1	1	1	1	1	1
0	1	2	1	1	0	3	0	1	1	2	2	2	1	1	5	1	1	1	1	1	1	1	1	1	1	1	1	1	1	1	1	1	1	1	1	1	1	1	1	1	1	1	1	1	1	1	1	1	1
0	1	2	1	2	1	2	1	4	2	3	2	2	2	1	8	1	1	1	1	1	1	1	1	1	1	1	1	1	1	1	1	1	1	1	1	1	1	1	1	1	1	1	1	1	1	1	1	1	1
0	1	2	1	2	1	3	0	4	1	1	2	2	1	1	30	4	1	1	4	1	1	1	1	1	2	1	1	1	1	1	1	1	1	1	1	1	1	1	1	1	1	1	1	1	1	1	1	1	1
0	1	2	1	2	1	3	0	4	2	1	1	2	1	1	30	5	1	2	1	1	1	1	1	1	1	2	1	1	1	1	1	1	1	2	1	1	1	2	2	2	1	1	2	2	2	2	1	2	2
0	1	2	1	2	1	3	0	3	1	1	1	1	1	1	6	1	1	1	1	1	1	1	1	1	1	1	1	1	1	1	1	1	1	1	1	1	1	1	1	1	1	1	1	1	1	1	1	1	1
0	1	2	1	2	1	3	0	3	1	1	3	2	1	1	6	1	1	1	1	1	1	1	1	1	1	1	1	1	1	1	1	1	1	1	1	1	1	1	1	1	1	1	1	1	1	1	1	1	1
0	1	2	1	2	1	3	0	3	2	1	2	2	1	1	8	1	1	1	1	1	1	1	1	1	1	1	1	1	1	1	1	1	1	1	1	1	1	1	1	1	1	1	1	1	1	1	1	1	1
0	1	2	1	2	1	3	0	4	1	2	3	2	2	1	9	1	1	1	1	1	1	1	1	1	1	1	1	1	1	1	1	1	1	1	1	1	1	1	1	1	1	1	1	1	1	1	1	1	1
0	1	2	1	2	1	3	0	3	3	2	1	1	4	2	5	1	1	1	1	1	1	1	1	1	1	1	1	1	1	1	1	1	1	1	1	1	1	1	1	1	1	1	1	1	1	1	1	1	1
0	1	2	1	2	1	3	0	4	1	1	2	2	1	1	7	1	1	1	1	1	1	1	1	1	2	1	4	2	1	1	1	1	1	1	1	1	4	1	1	1	1	1	1	1	1	1	1	1	1
0	1	2	1	2	1	3	0	4	3	3	4	3	3	2	6	1	1	1	1	1	1	1	1	1	1	1	1	1	1	1	1	1	1	1	1	1	1	1	1	1	1	1	1	1	1	1	1	1	1
0	1	2	1	2	0	3	0	2	1	1	1	1	1	1	7	1	1	1	1	1	1	1	1	1	1	1	1	1	1	1	1	1	1	1	1	1	1	1	1	1	1	1	1	1	1	1	1	1	1
0	1	2	1	2	0	3	0	1	3	1	4	4	1	3	13	1	2	1	1	1	1	1	1	1	1	1	1	1	1	1	1	1	1	1	1	1	1	1	1	1	1	1	1	1	1	1	1	1	1
0	1	2	1	2	0	3	0	4	2	1	1	2	1	3	10	1	1	1	1	1	1	1	1	1	1	1	1	1	1	1	1	1	1	1	1	1	1	1	1	1	1	1	1	1	1	1	1	1	1
0	1	2	3	1	1	3	0	3	1	3	2	2	1	1	10	1	1	1	1	1	1	1	1	1	1	1	1	1	1	1	1	1	1	1	1	1	1	1	1	1	1	1	1	1	1	1	1	1	1
0	1	2	1	1	1	1	0	4	1	1	2	2	1	1	5	1	1	1	1	1	1	1	1	1	1	1	1	1	1	5	1	1	1	1	1	1	1	1	1	1	1	1	1	1	1	1	1	1	1
0	1	2	1	1	1	2	1	4	1	1	1	1	1	1	30	1	1	1	1	1	1	1	1	1	1	1	1	1	1	1	1	1	1	1	1	1	1	1	1	1	1	1	1	1	1	1	1	1	1
0	1	2	1	1	1	3	0	1	3	1	1	2	1	1	6	1	1	1	1	1	1	1	1	1	1	1	1	1	1	1	1	1	1	1	1	1	1	1	1	1	1	1	1	1	1	1	1	1	1
0	1	2	1	1	1	3	0	3	3	1	1	1	1	1	7	1	1	1	1	1	1	1	1	1	1	1	1	1	1	1	1	1	1	1	1	1	1	1	1	1	1	1	2	1	1	1	1	1	1
0	1	2	1	1	1	3	0	3	3	1	1	1	1	1	7	1	1	1	1	1	1	1	1	1	1	1	1	1	1	1	1	1	1	1	1	1	1	1	1	1	1	1	2	1	1	1	1	1	1
0	1	2	1	1	1	3	0	3	2	2	2	2	1	1	7	1	1	1	1	1	1	1	1	1	1	1	1	1	1	1	1	1	1	1	1	1	1	1	1	1	1	1	1	1	1	1	1	1	5
0	1	2	1	1	1	3	0	4	2	3	3	3	2	1	30	1	1	1	1	1	1	1	1	1	1	1	1	1	1	1	1	1	1	1	1	1	1	1	1	1	1	1	1	1	1	1	1	1	1
0	1	2	1	2	1	2	0	3	1	1	1	1	1	1	6	1	1	1	1	4	1	1	1	1	1	1	1	1	1	1	1	1	1	1	1	1	1	1	1	1	1	1	1	1	1	1	1	1	1
0	1	2	1	2	1	2	0	4	2	1	1	2	1	1	9	1	1	1	1	1	1	1	1	1	1	1	2	2	1	1	4	1	2	1	1	1	2	1	1	1	1	1	1	1	1	1	1	2	1
0	1	2	1	2	1	3	0	3	2	2	4	4	2	2	8	2	2	1	1	5	2	3	1	1	3	1	1	1	3	1	1	1	1	1	3	1	3	2	1	1	1	2	1	1	1	1	1	1	1
0	1	2	1	2	0	3	0	2	1	2	3	2	3	1	4	1	1	1	1	1	1	1	1	1	1	1	1	1	1	1	1	1	1	1	1	1	1	1	1	1	1	1	1	1	1	1	1	1	1
0	1	2	1	1	1	2	0	2	4	4	1	3	2	1	7	1	2	1	1	4	3	2	1	1	1	1	1	1	2	4	1	1	1	3	5	1	5	1	1	1	1	1	4	4	4	1	1	1	1
0	1	2	1	1	1	3	0	4	1	1	2	1	1	1	30	1	2	2	1	1	1	1	1	1	1	1	1	1	1	1	1	1	1	1	1	1	1	1	1	1	1	1	1	1	1	1	1	1	1
0	1	2	1	1	1	3	0	2	4	4	4	4	2	4	5	1	1	1	1	1	1	1	1	1	1	1	1	1	1	1	1	1	1	1	1	1	1	1	1	1	1	1	1	1	1	1	1	1	1
0	1	2	1	1	1	3	0	2	1	1	1	1	1	1	8	1	1	1	1	1	1	1	1	1	2	1	2	2	1	2	1	1	1	1	1	1	2	1	1	1	1	1	2	1	1	2	1	2	1
0	1	2	1	1	1	3	0	2	1	1	3	4	1	1	6	2	4	4	1	2	2	2	2	3	1	2	2	2	2	5	5	4	1	1	1	1	1	2	1	1	4	2	4	4	4	4	4	1	1
0	1	2	1	1	1	3	0	2	1	1	3	4	1	1	6	2	4	4	1	2	2	2	2	3	1	2	2	2	2	5	5	4	1	1	1	1	1	2	1	1	4	2	4	4	4	4	4	1	1
0	1	2	1	1	1	3	0	3	1	1	4	3	3	3	9	2	3	1	1	2	1	5	3	3	1	5	1	5	5	3	3	3	5	3	5	1	1	5	2	2	2	5	5	2	5	5	5	5	1
0	1	2	1	1	0	3	0	1	4	4	2	3	4	2	11	1	1	1	1	1	1	1	1	1	1	1	1	1	1	1	1	1	1	1	1	1	1	1	1	1	1	1	1	1	1	1	1	1	1
0	1	2	1	2	1	2	0	2	4	4	1	3	2	1	7	1	2	1	1	4	3	2	1	1	1	1	1	1	2	4	1	1	1	3	5	1	5	1	1	1	1	1	4	4	4	1	1	1	1
0	1	2	1	2	1	0	0	2	2	4	4	4	1	4	4	4	4	1	1	1	1	2	1	1	1	1	5	4	1	1	1	1	5	5	5	1	1	1	1	1	1	1	5	5	1	1	1	1	1
0	1	2	1	2	1	3	0	3	1	1	1	1	1	1	7	1	1	1	1	1	1	1	1	1	1	1	1	1	1	1	1	1	1	1	1	1	1	1	1	1	1	1	1	1	1	1	1	1	1
0	1	2	1	2	1	3	0	3	1	1	1	4	1	1	5	1	1	1	1	1	1	1	1	1	1	1	1	1	1	1	1	1	1	1	1	1	1	1	1	1	1	1	1	1	1	1	1	1	1
0	1	2	1	2	1	3	0	3	1	1	2	2	1	1	8	1	1	1	1	1	1	1	1	1	1	1	1	1	1	1	1	1	1	1	1	1	1	1	1	1	1	1	1	1	1	1	1	1	1
0	1	2	1	2	1	3	0	2	2	1	1	1	1	1	5	2	4	1	1	1	3	3	2	3	1	2	4	4	2	3	4	4	2	4	3	5	5	2	1	5	4	4	3	2	2	4	4	4	1
0	1	2	1	2	1	3	0	2	2	1	1	1	1	1	5	2	4	1	1	1	3	3	2	3	1	2	4	4	2	3	4	4	2	4	3	5	5	2	1	5	4	4	3	2	2	4	4	4	1
0	1	2	1	2	1	3	0	4	1	3	1	2	1	1	5	3	5	1	1	1	3	5	5	4	5	3	5	5	5	2	2	3	5	2	1	2	1	5	2	2	5	5	5	1	3	4	2	2	1
0	1	2	1	2	1	3	0	4	1	3	1	2	1	1	5	3	5	1	1	1	3	5	5	4	5	3	5	5	5	2	2	3	5	2	1	2	1	5	2	2	5	5	5	1	3	4	2	2	1
0	1	2	1	2	1	3	0	0	2	1	3	2	1	1	7	1	1	1	1	1	1	1	1	1	1	1	1	1	1	1	1	1	1	1	1	1	1	1	1	1	1	1	1	1	1	1	1	1	1
0	1	2	1	2	1	3	0	4	1	1	2	1	1	1	6	1	1	1	1	1	1	1	1	1	1	1	3	1	1	1	1	1	1	1	1	1	1	1	1	1	1	1	3	1	1	1	1	1	1
0	1	2	1	2	1	3	0	4	1	1	2	1	1	1	6	1	1	1	1	1	1	1	1	1	1	1	3	1	1	1	1	1	1	1	1	1	1	1	1	1	1	1	3	1	1	1	1	1	1
0	1	2	1	2	0	2	0	4	1	1	1	1	1	1	7	1	1	1	1	1	1	1	1	1	1	1	1	1	1	1	1	1	1	1	1	1	1	1	1	1	1	1	1	1	1	1	1	1	1
0	1	2	1	0	0	3	0	4	1	2	2	2	1	1	6	1	1	1	1	1	1	1	1	1	1	1	1	1	1	1	1	1	1	1	1	1	1	1	1	1	1	1	1	1	1	1	1	1	1
0	1	2	1	1	1	3	0	3	2	1	2	4	1	1	6	3	1	1	1	1	2	1	1	1	1	2	3	1	2	1	1	1	1	1	2	1	1	3	1	1	1	1	2	3	1	1	1	1	1
0	1	2	1	1	0	3	0	4	1	4	3	2	2	2	3	1	1	1	1	1	1	1	1	1	1	1	5	5	1	1	1	1	1	1	5	5	5	1	1	1	1	1	1	1	1	1	1	1	1
0	1	2	1	1	0	3	0	4	3	1	1	2	2	2	8	4	1	1	1	1	1	2	1	4	2	1	2	1	2	2	2	1	2	1	1	1	5	1	1	1	1	2	1	2	1	1	1	1	1
0	1	2	1	2	1	3	0	2	2	2	2	3	2	2	9	1	1	1	1	1	1	1	1	1	1	1	1	1	1	1	1	1	1	1	1	1	1	1	1	1	1	1	1	1	1	1	1	1	1
0	1	2	1	2	1	3	0	4	2	3	2	1	1	1	7	1	1	1	1	1	5	1	1	1	1	1	1	1	1	1	1	1	1	1	1	1	1	1	1	1	1	1	1	1	1	1	1	1	1
0	1	2	1	1	1	1	1	4	2	3	3	1	3	2	6	1	1	1	1	1	1	2	1	1	1	1	1	1	1	2	1	2	1	1	1	1	1	1	1	1	1	1	1	1	1	1	1	1	1
0	1	2	1	1	1	1	1	4	2	3	3	1	3	2	7	1	1	1	1	1	1	2	1	1	1	1	1	1	1	2	1	2	1	1	1	1	1	1	1	1	1	1	1	1	1	1	1	1	1
0	1	2	1	1	1	3	0	2	1	1	3	1	4	4	8	1	1	1	1	1	1	1	1	1	1	1	1	1	1	1	1	1	1	1	1	1	1	1	1	1	1	1	1	1	1	1	1	1	1
0	1	2	1	2	1	3	0	3	1	1	1	1	1	1	10	2	1	1	3	1	1	1	1	1	1	1	1	3	1	1	1	1	1	1	1	1	1	1	1	1	1	1	1	1	1	1	1	1	1
0	1	2	1	0	0	3	0	3	1	2	3	4	2	1	7	1	1	1	1	1	1	1	1	1	1	1	1	1	2	1	1	1	1	1	1	1	1	1	1	1	1	1	1	1	1	1	1	1	1
0	1	2	1	1	1	3	0	2	2	1	1	1	1	1	9	1	1	1	1	1	1	1	1	1	1	1	1	1	1	1	1	1	1	1	1	1	1	1	1	1	1	1	1	1	1	1	1	1	1
0	1	2	1	1	0	3	0	1	3	4	4	4	3	4	6	1	1	1	1	1	1	1	1	1	1	1	1	1	1	1	1	1	1	1	1	1	1	1	1	1	1	1	1	1	1	1	1	1	1
0	1	2	1	2	0	3	0	4	1	1	1	2	1	1	8	1	1	1	2	2	1	1	1	1	1	1	1	1	1	1	1	1	1	1	1	1	1	1	1	1	1	1	1	1	1	1	1	1	1
0	1	2	1	2	0	3	0	4	1	1	1	2	1	1	8	1	1	1	2	2	1	1	1	1	1	1	1	1	1	1	1	1	1	1	1	1	1	1	1	1	1	1	1	1	1	1	1	1	1
0	1	2	1	2	1	3	0	4	1	3	4	3	3	1	6	1	1	1	1	1	1	1	1	1	1	1	1	1	1	1	1	1	1	1	1	1	1	1	1	1	1	1	1	1	1	1	1	1	1
0	1	2	1	2	1	3	0	4	1	3	4	3	3	1	6	1	1	1	1	1	1	1	1	1	1	1	1	1	1	1	1	1	1	1	1	1	1	1	1	1	1	1	1	1	1	1	1	1	1
0	1	2	1	2	1	3	0	4	1	1	1	1	1	1	10	1	1	1	5	1	1	1	1	1	1	1	1	2	1	1	1	1	1	1	1	1	1	1	1	1	1	1	1	1	1	1	1	1	1
0	1	2	1	1	1	3	0	1	2	1	2	3	1	1	30	1	1	1	1	1	1	1	1	1	1	1	1	1	1	1	1	1	1	1	1	1	1	1	1	1	1	1	1	1	1	1	1	1	1
0	1	2	1	1	1	3	0	4	1	1	1	1	3	1	8	1	1	1	1	1	1	1	1	1	1	1	1	1	1	1	1	1	1	1	1	1	1	1	1	1	1	1	1	1	1	1	1	1	1
0	1	2	1	1	0	2	0	4	1	1	4	4	1	4	8	1	5	1	1	1	1	1	3	1	4	4	1	1	2	2	4	1	3	1	2	1	1	4	1	4	4	1	1	4	1	1	1	5	1
0	1	2	1	2	1	3	0	3	4	1	1	1	4	1	5	1	1	1	1	1	1	1	1	1	1	1	1	1	1	1	1	1	1	1	1	1	1	1	1	1	1	1	1	1	1	1	1	1	1
0	1	2	1	2	1	2	0	4	2	1	2	4	1	1	8	1	2	1	1	1	1	1	1	5	5	5	5	1	1	1	1	1	1	1	1	1	1	1	1	1	1	1	1	1	1	1	1	1	1
0	1	2	1	1	1	3	0	3	2	2	1	4	1	1	9	2	1	1	1	1	1	1	1	1	1	1	1	1	1	1	1	1	1	1	1	1	2	1	1	1	1	1	2	2	1	1	1	1	1
0	1	2	1	1	1	3	0	2	2	2	1	1	1	1	6	1	1	1	1	1	1	1	1	1	1	1	1	1	1	1	1	1	1	1	1	1	1	1	1	1	1	1	1	1	1	1	1	1	1
0	1	2	1	2	0	2	1	3	2	1	3	2	1	1	7	1	1	1	1	1	1	1	1	1	1	1	1	1	1	1	1	1	1	1	1	1	1	1	1	1	1	1	1	1	1	1	1	1	1
0	1	2	1	2	0	2	1	3	2	1	3	2	1	1	7	1	1	1	1	1	1	1	1	1	1	1	1	1	1	1	1	1	1	1	1	1	1	1	1	1	1	1	1	1	1	1	1	1	1
0	1	2	1	2	1	3	0	3	1	1	2	2	1	1	5	1	1	1	1	1	1	1	1	1	1	1	1	1	1	1	1	1	1	1	1	1	1	1	1	1	1	1	1	1	1	1	1	1	1
0	1	2	1	2	1	3	0	3	1	1	2	2	1	1	5	1	1	1	1	1	1	1	1	1	1	1	1	1	1	1	1	1	1	1	1	1	1	1	1	1	1	1	1	1	1	1	1	1	1
0	1	2	1	1	1	1	1	3	3	4	4	4	4	4	5	1	1	1	1	1	1	1	1	1	1	1	1	1	1	1	1	1	1	1	1	1	1	1	1	1	1	1	1	1	1	1	1	1	1
0	1	2	1	1	1	3	0	3	1	1	1	1	1	1	8	1	1	1	1	1	1	1	1	1	1	1	1	5	5	1	1	1	4	5	3	3	4	3	4	2	1	1	1	1	1	1	1	1	1
0	1	2	1	1	1	3	0	2	1	1	2	1	1	1	9	1	1	1	1	1	1	1	1	1	1	1	1	1	1	1	1	1	1	1	1	1	1	1	1	1	1	1	1	1	1	1	1	1	1
0	1	2	1	1	0	3	0	2	1	2	1	2	2	1	8	1	1	1	1	1	1	1	1	2	1	1	4	1	1	1	1	1	1	1	1	1	1	1	1	1	1	1	2	1	1	1	1	1	1
0	1	2	1	1	1	3	0	3	4	1	4	1	1	4	7	1	1	1	1	1	1	2	1	2	1	1	2	1	5	1	2	1	2	1	1	1	2	2	2	2	3	1	2	4	4	2	3	5	1
0	1	2	1	1	1	3	0	1	3	3	1	1	1	1	6	1	2	1	1	3	1	1	1	1	1	2	1	1	2	1	1	1	1	1	1	1	1	1	1	1	1	1	2	1	1	1	2	2	1
0	1	2	1	2	1	3	0	4	3	1	2	1	1	1	9	2	1	1	1	1	1	2	1	1	1	1	1	1	1	1	1	1	1	1	1	1	1	1	1	2	1	1	2	1	1	1	1	1	1
0	1	2	1	0	0	3	0	2	3	1	2	2	2	2	5	2	2	1	1	1	1	1	1	1	1	1	1	1	1	1	1	1	2	1	2	1	4	2	1	1	1	1	1	2	1	1	1	2	1
0	1	2	1	2	0	2	1	3	1	2	1	2	2	1	7	1	1	1	1	3	1	1	1	1	1	1	5	1	1	1	1	1	1	1	1	1	1	1	1	1	1	1	1	1	1	1	1	1	1
0	1	2	1	1	1	3	0	3	4	2	3	4	1	2	7	2	2	1	1	1	1	2	1	1	1	1	1	1	1	1	1	1	1	2	1	1	1	1	1	1	1	1	1	1	1	1	1	1	1
0	1	2	1	2	1	3	0	4	3	3	4	3	3	2	8	1	1	1	1	1	1	1	1	1	1	1	1	1	1	1	1	1	1	1	1	1	1	1	1	1	1	1	1	1	1	1	1	1	1
0	1	2	1	1	1	3	0	1	2	2	1	2	1	1	9	4	1	1	1	2	1	1	1	1	1	1	1	2	1	1	2	1	2	1	1	1	4	1	1	1	2	1	2	2	1	1	1	1	1
0	1	2	1	1	1	3	0	1	2	2	1	2	1	1	9	4	1	1	1	2	1	1	1	1	1	1	1	2	1	1	2	1	2	1	1	1	4	1	1	1	2	1	2	2	1	1	1	1	1
0	1	2	1	2	1	1	1	3	3	2	3	3	1	2	6	1	1	1	1	1	1	1	1	1	1	1	1	4	4	1	1	1	1	1	1	1	4	1	1	1	1	1	1	4	1	1	1	1	1
0	1	2	1	2	1	1	1	3	3	2	3	3	1	2	6	1	1	1	1	1	1	1	1	1	1	1	1	4	4	1	1	1	1	1	1	1	4	1	1	1	1	1	1	4	1	1	1	1	1
0	1	2	1	1	1	2	0	3	1	2	1	3	1	1	6	1	1	1	4	2	1	1	1	1	1	1	1	1	1	1	1	1	1	1	1	1	1	1	1	1	1	1	1	1	1	1	1	2	2
0	1	2	1	1	1	2	0	3	1	2	1	3	1	1	6	1	1	1	4	2	1	1	1	1	1	1	1	1	1	1	1	1	1	1	1	1	1	1	1	1	1	1	1	1	1	1	1	2	2
0	1	3	1	1	1	3	0	0	1	1	1	3	1	2	30	1	1	1	1	1	1	1	1	1	1	1	1	1	1	1	1	1	1	1	1	1	1	1	1	1	1	1	1	1	1	1	1	1	1
0	1	3	1	1	0	3	0	1	1	2	3	3	2	2	5	3	3	2	2	2	2	2	2	2	2	2	2	2	2	2	1	2	2	2	2	2	2	2	2	2	2	1	2	1	1	1	1	2	1
0	1	3	1	2	0	3	0	1	1	2	3	3	2	2	5	3	3	2	2	2	2	2	2	2	2	2	2	2	2	2	1	2	2	2	2	2	2	2	2	2	2	1	2	1	1	1	1	2	1
0	1	3	3	1	1	3	0	3	2	3	3	1	2	1	5	1	4	1	4	1	1	1	1	1	1	1	1	1	1	1	1	1	1	1	1	1	1	1	1	1	1	1	1	1	1	1	1	1	1
0	1	3	1	1	1	3	0	4	2	4	2	3	1	2	9	3	1	5	5	3	3	3	3	3	3	1	3	4	3	5	3	5	3	3	4	3	3	1	3	1	3	3	3	3	5	5	3	3	1
0	1	3	1	2	1	3	0	4	1	1	1	2	2	1	9	1	1	1	1	1	1	1	1	1	1	1	1	1	1	1	1	1	1	1	1	1	4	1	1	1	1	1	1	1	1	1	1	1	1
0	1	3	1	2	1	3	0	3	1	1	2	1	1	1	9	1	1	1	4	4	1	1	1	1	1	1	1	1	1	1	1	1	1	1	1	1	1	1	1	1	1	1	1	1	1	1	1	1	1
0	1	3	1	0	0	3	0	2	1	1	1	1	1	1	3	1	1	1	1	1	1	1	1	1	1	1	1	1	1	1	1	1	1	1	1	1	1	1	1	1	1	1	1	1	1	1	1	1	1
0	1	3	1	1	1	3	0	2	1	2	1	2	1	1	5	1	3	1	1	1	1	1	1	1	1	1	1	1	1	1	1	1	1	1	1	1	1	1	1	1	1	1	1	1	1	1	1	1	1
0	1	3	1	1	0	3	0	3	1	2	2	2	3	2	7	1	1	1	1	1	1	1	1	2	1	1	5	2	1	1	1	1	1	1	1	1	2	1	1	1	1	1	4	1	1	1	1	1	1
0	1	3	1	1	0	3	0	3	1	2	2	2	3	2	7	1	1	1	1	1	1	1	1	2	1	1	5	2	1	1	1	1	1	1	1	1	2	1	1	1	1	1	4	1	1	1	1	1	1
0	1	3	1	2	1	3	0	2	2	2	4	3	1	1	4	2	2	2	1	2	2	5	5	5	1	1	4	1	1	1	1	1	2	1	1	1	1	2	2	1	1	1	5	4	3	1	1	1	1
0	1	3	1	2	1	3	0	3	1	2	2	2	4	2	30	1	2	2	4	1	4	4	1	1	3	1	1	1	1	2	1	1	1	2	1	1	1	1	1	1	1	1	1	1	1	1	1	1	1
0	1	3	1	2	1	3	0	3	4	1	1	4	1	1	8	1	1	1	1	1	1	1	1	1	1	1	1	1	1	1	5	1	1	1	1	5	1	1	1	1	1	1	1	1	1	1	5	1	1
0	1	3	3	1	0	3	0	2	1	1	4	2	1	3	3	2	1	1	1	1	1	2	1	2	1	1	1	1	1	1	1	1	1	1	1	1	1	1	1	1	1	1	1	1	1	1	1	1	1
0	1	3	1	2	1	3	0	4	2	4	2	2	1	1	8	1	1	1	1	1	1	1	1	1	1	1	1	1	1	1	1	1	1	1	1	1	1	1	1	1	1	1	1	1	1	1	1	1	1
0	1	3	1	0	0	3	0	2	4	2	2	4	4	4	6	1	1	1	1	1	1	1	1	1	1	1	1	1	1	1	1	1	1	1	1	1	1	1	1	1	1	1	1	1	1	1	1	1	1
0	1	3	2	1	0	3	0	3	1	3	1	1	1	1	30	2	4	1	1	1	1	1	1	1	1	2	5	4	1	1	1	1	1	1	1	1	5	1	1	1	1	1	2	1	1	1	2	1	1
0	1	3	3	1	1	3	0	2	1	1	1	1	1	1	6	1	1	1	1	1	1	1	1	1	1	1	1	1	1	1	1	1	1	1	1	1	1	1	1	1	1	1	1	1	1	1	1	1	1
0	1	3	1	1	1	3	0	4	1	4	4	4	1	1	8	4	1	1	1	1	1	1	1	1	1	2	1	3	1	1	1	2	1	1	2	1	3	1	1	1	1	2	2	2	1	1	1	1	1
0	1	3	1	2	1	3	0	2	4	4	4	4	3	3	30	1	1	1	1	1	1	1	1	1	1	1	1	1	1	1	1	1	1	1	1	1	1	1	1	1	1	1	1	1	1	1	1	1	1
0	1	3	1	1	1	3	0	1	1	1	1	1	1	1	8	1	1	1	1	1	1	1	1	1	1	1	1	1	1	1	1	1	1	1	1	1	1	1	1	1	1	1	1	1	1	1	1	1	1
0	1	3	1	2	1	3	0	4	2	1	2	2	1	1	8	1	1	1	1	1	1	1	1	1	1	1	1	1	1	1	1	1	1	1	1	1	1	1	1	1	1	1	1	1	1	1	1	1	1
0	1	3	1	2	1	3	0	4	2	1	2	2	1	1	8	1	1	1	1	1	1	1	1	1	1	1	1	1	1	1	1	1	1	1	1	1	1	1	1	1	1	1	1	1	1	1	1	1	1
0	1	3	1	1	1	3	0	3	1	2	1	4	1	1	7	1	1	1	1	1	1	1	4	1	1	1	1	1	1	1	4	1	4	1	1	1	1	1	1	1	1	1	2	2	2	1	2	1	1
0	1	3	1	1	1	3	0	3	1	1	3	3	2	1	5	2	2	1	1	1	2	2	2	2	1	1	1	1	5	2	1	1	1	1	1	1	5	2	1	1	1	1	2	1	1	1	1	1	1
0	1	3	1	2	1	3	0	3	1	1	3	3	2	1	5	2	2	1	1	1	2	2	2	2	1	1	1	1	5	2	1	1	1	1	1	1	5	2	1	1	1	1	2	1	1	1	1	1	1
0	1	3	1	2	0	3	0	0	2	1	4	4	4	4	10	1	5	5	5	5	5	5	5	5	5	5	5	5	5	5	5	5	5	5	1	1	1	5	5	1	5	1	2	5	5	2	3	5	1
0	1	3	1	2	1	2	1	4	2	1	1	2	2	1	9	3	4	1	1	1	1	1	1	4	1	1	4	1	1	1	1	1	1	1	1	1	5	4	1	1	1	1	5	4	2	1	1	1	1
0	1	3	1	2	1	3	0	2	2	2	1	4	1	2	4	1	1	1	1	1	1	1	1	1	1	1	1	1	1	1	1	1	1	1	1	1	1	1	1	1	1	1	1	1	1	1	1	1	1
0	1	3	1	2	1	3	0	3	1	1	1	1	2	1	8	1	1	1	1	1	1	1	1	1	1	1	1	1	1	1	1	1	1	1	1	1	1	1	1	1	1	1	1	1	1	1	1	1	1
0	1	3	1	2	1	2	1	3	3	1	1	1	1	2	5	1	1	1	1	1	1	1	1	1	1	1	1	1	1	1	1	5	1	1	1	1	1	1	1	1	1	1	1	1	1	1	1	1	1
0	1	3	1	2	1	3	0	4	1	1	1	1	1	1	6	1	1	1	1	1	1	1	5	5	1	1	1	5	5	1	1	1	1	1	1	1	1	1	1	1	1	1	1	1	1	1	1	1	1
0	1	3	1	2	0	2	1	3	1	1	4	4	1	1	9	2	1	1	1	1	1	1	1	1	1	1	1	2	1	2	1	1	1	1	1	1	1	1	1	1	1	1	2	2	1	1	1	1	1
0	1	4	1	1	1	3	0	1	2	2	2	1	1	1	9	1	1	1	1	1	1	1	1	1	1	1	1	1	1	1	1	1	1	1	1	1	1	1	1	1	1	1	1	1	1	1	1	1	1
0	1	4	1	1	0	2	0	2	1	1	1	2	2	4	5	1	1	1	1	1	1	1	1	1	1	1	1	1	1	1	1	1	1	1	1	1	1	1	1	1	1	1	1	1	1	1	1	1	1
0	1	4	2	1	1	3	0	1	1	1	1	3	1	1	5	1	1	1	1	1	1	1	1	1	1	1	1	1	1	1	1	1	1	1	1	1	1	1	1	1	1	1	1	1	1	1	1	1	1
0	1	4	1	1	0	1	1	0	4	4	4	3	2	1	10	1	1	1	1	1	1	1	1	1	1	1	1	1	1	1	1	1	1	1	1	1	1	1	1	1	1	1	1	1	1	1	1	1	1
0	1	4	1	2	1	3	0	4	2	1	1	1	1	2	7	1	1	5	1	1	1	1	5	5	5	5	1	5	1	1	1	5	1	5	5	5	5	5	5	5	5	1	1	1	1	1	1	1	1
0	1	5	1	2	0	3	0	2	4	4	3	1	1	2	15	1	1	1	4	1	1	1	4	1	1	1	1	1	1	1	1	1	1	1	1	1	1	1	1	1	1	1	1	1	1	1	1	1	1
0	1	2	1	2	1	3	0	3	1	2	1	2	3	1	8	1	1	1	1	1	1	1	1	1	1	1	1	1	1	1	1	1	1	1	1	1	1	1	1	1	1	1	1	1	1	1	1	1	1
0	1	2	1	1	1	3	0	2	1	1	1	1	1	1	5	1	1	1	1	1	1	3	1	1	1	1	1	1	1	1	1	1	1	1	1	1	1	1	1	1	1	1	1	1	1	1	1	1	1
0	1	2	1	2	1	3	0	2	2	1	1	1	2	1	8	1	1	1	1	1	1	1	1	1	1	1	1	1	1	1	1	1	1	1	1	1	1	1	1	1	1	1	1	1	1	1	1	1	1
0	2	4	1	2	1	2	1	3	1	2	3	4	4	2	7	1	1	3	4	2	5	2	3	1	1	3	2	2	3	5	1	1	3	1	2	4	5	1	1	2	4	4	5	5	1	2	2	1	2
0	2	4	1	2	1	3	0	4	2	3	4	3	2	1	7	1	1	1	1	1	1	1	1	1	1	1	1	1	1	1	1	1	1	1	1	1	1	1	1	1	1	1	1	1	1	1	1	1	1
0	2	0	1	1	1	3	0	3	1	1	2	1	1	1	30	1	1	3	5	1	5	1	1	1	5	1	1	1	5	1	5	1	1	5	1	1	1	1	5	1	1	1	5	5	1	5	2	1	1
0	2	1	1	1	1	3	0	1	1	1	1	4	1	1	6	1	4	2	1	1	3	2	3	3	1	3	2	3	4	1	2	3	2	1	3	4	3	1	3	3	2	1	4	3	1	2	1	5	2
0	2	2	1	1	1	3	0	1	2	1	1	1	1	1	8	3	3	3	1	1	3	3	3	3	3	3	1	3	3	5	3	1	1	1	1	3	1	1	1	1	1	1	3	1	1	3	1	1	1
0	2	2	1	2	1	3	0	3	2	1	1	2	1	1	5	1	1	1	1	1	1	1	1	1	1	1	2	1	1	1	1	1	1	1	1	1	1	1	1	1	1	1	1	1	1	1	1	1	1
0	2	3	1	1	1	3	0	3	2	2	1	1	1	2	5	3	5	5	2	1	2	2	5	3	3	3	3	3	3	3	1	3	3	3	3	3	3	3	3	3	3	3	5	5	3	3	5	3	1
0	2	3	3	2	0	3	0	3	1	1	2	1	2	3	6	1	1	1	1	1	1	1	1	1	1	1	1	1	1	1	1	1	1	1	1	1	1	1	1	1	1	1	1	1	1	1	1	1	1
0	2	3	1	2	1	1	1	4	1	1	1	1	1	1	3	1	1	1	1	1	1	1	1	1	1	1	1	1	1	1	1	1	1	1	1	1	1	1	1	1	1	1	1	1	1	1	1	1	1
0	2	3	1	2	1	2	1	2	2	4	2	2	1	1	4	4	4	1	3	2	4	2	1	5	2	1	2	1	2	1	1	5	2	5	4	1	1	5	5	1	4	4	4	4	1	2	2	5	1
0	2	3	1	2	1	2	0	3	1	1	2	1	1	1	6	1	1	1	1	1	1	1	1	1	1	1	1	1	1	1	1	1	1	1	1	1	1	1	1	1	1	1	1	1	1	1	1	1	1
0	2	4	1	1	1	3	0	2	3	1	4	2	1	3	12	2	2	1	1	1	1	3	2	2	2	2	4	2	2	4	3	3	3	3	3	3	3	1	1	3	1	4	4	3	3	3	3	1	1
0	2	4	1	2	1	3	0	3	2	4	4	4	2	2	30	2	1	1	1	1	1	2	2	2	2	2	3	5	1	2	2	1	4	1	1	1	2	1	4	1	1	2	1	1	2	1	2	2	1
0	2	4	1	1	1	3	0	1	1	2	1	2	1	1	7	1	1	1	1	1	1	1	1	1	1	1	1	1	1	1	1	1	1	1	1	1	1	1	1	1	1	1	1	1	1	1	1	1	1
0	2	4	1	1	1	3	0	4	1	1	1	1	1	1	9	1	1	1	1	1	1	1	1	1	1	1	1	1	1	1	1	1	1	1	1	1	1	1	1	1	1	1	1	1	1	1	1	1	1
0	2	4	1	1	1	3	0	3	1	1	1	1	1	1	9	3	1	3	1	1	3	1	3	1	1	1	1	1	1	1	1	1	3	1	1	1	1	1	1	1	1	1	1	3	3	1	1	1	1
0	2	4	1	1	0	3	0	2	1	1	1	1	1	1	12	1	1	1	1	1	1	1	1	1	4	1	1	4	4	1	4	1	4	1	1	1	4	4	1	1	4	3	4	2	1	3	5	4	1
0	2	4	1	2	1	3	0	2	1	1	1	4	1	4	30	1	1	1	1	1	1	1	1	1	1	1	1	1	1	1	3	3	3	3	1	1	1	1	1	3	3	1	1	1	1	1	1	1	1
0	2	4	1	2	1	3	0	4	1	1	1	2	1	1	6	1	1	1	1	1	1	1	1	1	1	1	1	1	1	1	1	1	1	1	1	1	1	1	1	1	1	1	1	1	1	1	1	1	1
0	2	4	1	2	0	3	0	4	2	1	4	4	2	2	9	3	3	3	4	3	3	3	3	3	3	3	3	3	3	3	3	3	3	3	3	3	3	3	3	3	3	3	3	3	3	3	3	3	3
0	2	4	3	1	0	3	0	4	1	2	2	4	1	2	6	1	1	1	1	1	1	1	1	1	1	1	1	1	1	1	1	1	1	1	1	1	5	1	1	1	1	1	1	1	1	1	1	1	1
0	2	4	1	1	1	2	1	3	1	1	1	2	1	1	30	1	1	1	1	1	1	1	1	1	1	1	1	1	1	1	1	1	1	1	1	1	1	1	1	1	1	1	1	1	1	1	1	1	1
0	2	4	1	1	1	3	0	3	1	1	1	2	1	1	7	1	1	1	1	1	1	1	1	1	1	1	1	1	1	1	1	1	1	1	1	1	1	1	1	1	1	1	1	1	1	1	1	1	1
0	2	4	1	1	1	3	0	4	2	1	1	2	1	1	12	1	2	1	1	1	1	1	1	1	1	1	2	1	1	1	1	1	1	1	1	1	4	1	1	1	1	1	1	2	1	1	1	2	1
0	2	4	1	1	1	3	0	3	1	1	1	1	1	1	12	1	1	1	1	1	1	1	1	1	1	1	1	1	1	1	1	1	1	1	1	1	1	1	1	1	1	1	1	1	1	1	1	1	1
0	2	4	1	2	1	1	0	3	3	1	4	3	1	2	9	3	1	5	1	1	1	1	1	1	1	1	1	1	1	1	1	1	1	1	1	1	1	1	1	1	1	1	1	1	1	1	1	1	1
0	2	4	1	2	1	3	0	3	1	1	1	1	1	1	7	3	4	2	3	2	3	3	4	4	4	4	3	3	4	3	4	3	3	4	1	3	1	4	4	4	4	3	4	4	4	3	4	4	1
0	2	4	1	2	1	3	0	4	3	2	2	1	1	3	9	1	1	1	1	3	1	1	1	1	1	1	1	1	1	1	1	1	1	1	1	1	1	1	1	1	1	1	1	1	1	1	1	1	1
0	2	4	1	2	1	3	0	3	1	1	2	2	1	3	5	1	1	1	1	1	1	1	1	1	1	1	1	1	1	1	1	1	1	1	1	1	1	1	1	1	1	1	1	1	1	1	1	1	1
0	2	4	1	2	1	3	0	4	2	1	2	2	1	2	5	1	1	1	1	1	1	1	1	1	1	1	1	1	1	1	1	1	1	1	1	1	1	1	1	1	1	1	1	1	1	1	1	1	1
0	2	4	1	2	1	3	0	3	2	1	2	4	3	1	10	1	1	1	1	1	1	1	1	1	1	1	1	1	1	1	1	1	1	1	1	1	1	1	1	1	1	1	1	1	1	1	1	1	1
0	2	4	1	2	1	3	0	3	1	1	1	2	1	1	7	1	1	1	1	5	1	1	1	1	1	1	1	1	1	1	1	1	1	1	5	1	1	1	1	1	1	1	1	1	1	1	1	1	1
0	2	4	1	2	0	2	1	1	1	1	2	2	1	1	8	1	1	1	1	1	1	1	1	1	1	1	1	1	1	1	1	1	1	1	1	1	1	1	1	1	1	1	1	1	1	1	1	1	1
0	2	4	3	1	1	2	0	4	2	2	3	4	2	1	8	1	1	1	1	1	1	1	1	1	1	1	1	2	1	1	1	1	1	1	1	1	1	1	1	1	1	1	1	1	1	1	1	1	1
0	2	4	3	1	1	3	0	4	2	4	4	3	1	2	6	1	1	1	1	1	1	1	1	1	1	1	1	1	1	1	1	1	1	1	1	1	1	1	1	1	1	1	1	1	1	1	1	1	1
0	2	4	3	1	0	3	0	4	1	1	2	1	1	1	9	4	2	1	1	1	1	1	1	1	1	2	4	1	1	2	1	1	2	1	1	1	4	1	1	1	1	1	2	2	1	1	1	1	1
0	2	4	3	2	0	3	0	3	1	1	4	4	1	1	10	1	1	1	1	1	1	1	1	1	1	1	1	1	1	1	1	1	1	1	1	1	1	1	1	1	1	1	1	1	1	1	1	1	1
0	2	4	1	1	1	2	1	4	1	3	2	2	1	1	7	1	1	1	1	1	1	1	1	1	2	2	1	1	1	1	1	1	1	1	1	1	1	1	1	1	1	1	1	1	1	1	1	1	1
0	2	4	1	2	0	3	0	3	2	1	1	1	1	1	7	1	1	1	1	4	1	1	1	1	1	1	1	1	1	1	1	1	1	1	1	1	1	1	1	1	1	1	1	1	1	1	1	1	1
0	2	4	1	2	0	3	0	2	2	1	2	2	1	1	3	1	1	1	1	1	1	1	1	1	1	1	1	1	1	1	1	1	1	1	1	1	1	1	1	1	1	1	1	1	1	1	1	1	1
0	2	4	3	1	0	3	0	4	1	1	1	1	1	1	0	1	1	1	1	1	1	1	1	1	1	1	1	1	1	1	1	1	1	1	1	1	1	1	1	1	1	1	1	1	1	1	1	1	1
0	2	4	3	2	0	3	0	1	2	2	3	4	2	2	7	1	1	1	1	1	1	1	1	1	1	1	1	1	1	1	1	1	1	1	1	1	1	1	1	1	1	1	1	1	1	1	1	1	1
0	2	4	1	1	1	1	1	2	2	2	2	1	1	1	7	1	1	1	1	1	1	2	1	1	1	3	4	1	2	2	1	1	2	1	2	1	2	2	1	1	1	1	2	2	1	1	1	1	1
0	2	4	1	1	1	2	0	2	2	1	1	2	1	1	5	1	1	1	1	1	1	1	1	1	1	1	1	1	1	1	1	1	1	1	1	1	1	1	1	1	1	1	1	1	1	1	1	1	1
0	2	4	1	1	1	3	0	4	1	1	2	1	1	1	8	1	1	1	1	1	1	1	1	1	1	1	1	1	1	1	1	1	1	1	1	1	1	1	1	1	1	1	1	1	1	1	1	1	1
0	2	4	1	1	1	3	0	3	1	1	1	1	1	1	6	1	1	1	4	1	1	1	1	1	1	1	1	1	1	1	1	1	1	1	1	1	1	1	1	1	1	1	1	1	1	1	1	1	1
0	2	4	1	1	1	3	0	4	2	1	1	1	1	1	9	4	4	1	4	1	2	4	4	4	4	4	2	4	5	1	5	4	4	1	5	2	2	5	2	5	3	4	5	3	4	4	4	4	1
0	2	4	1	1	1	3	0	4	2	3	2	3	1	1	5	1	1	1	1	1	1	1	1	1	1	1	1	1	1	1	1	1	1	1	1	1	1	1	1	1	1	1	1	1	1	1	1	1	1
0	2	4	1	1	0	1	0	3	1	1	1	1	1	1	5	5	3	1	1	2	1	5	2	5	4	5	3	1	1	3	2	1	3	1	5	1	2	1	1	1	5	1	5	5	2	1	1	1	1
0	2	4	1	1	0	3	0	3	1	1	1	1	1	1	7	1	1	1	1	1	1	2	1	1	1	1	2	2	2	1	1	1	1	1	1	1	1	1	1	1	1	1	2	2	1	1	1	1	1
0	2	4	1	2	1	2	1	4	1	1	1	1	1	1	5	1	1	1	1	1	1	1	5	5	1	1	1	1	1	1	5	1	1	1	1	1	1	1	1	1	1	1	1	1	1	1	1	1	1
0	2	4	1	2	1	2	1	3	2	3	2	2	1	1	6	2	2	1	1	1	1	1	1	1	1	1	1	1	1	1	1	1	1	1	1	1	2	1	1	1	1	1	2	1	1	1	1	1	1
0	2	4	1	2	1	3	0	3	1	1	2	1	2	1	7	1	1	1	1	1	1	1	1	1	1	1	1	1	1	1	1	1	1	1	1	1	1	1	1	1	1	1	1	1	1	1	1	1	1
0	2	4	1	2	1	3	0	4	2	2	1	1	3	1	5	1	1	1	1	1	1	1	1	1	1	1	1	1	1	1	1	1	1	1	1	1	1	1	1	1	1	1	1	1	1	1	1	1	1
0	2	4	1	2	1	3	0	4	1	1	2	1	1	1	9	1	1	1	2	3	1	1	1	1	1	1	5	1	1	1	1	1	1	1	1	1	2	1	1	1	1	1	1	1	1	1	1	1	1
0	2	4	1	2	1	3	0	4	3	2	2	3	1	2	6	1	3	1	2	2	3	2	3	3	1	1	2	4	2	1	1	2	1	1	2	1	1	1	3	3	1	3	3	3	3	1	1	1	1
0	2	4	1	2	1	3	0	2	3	2	1	1	1	1	2	1	1	1	5	1	1	1	1	1	1	1	1	1	1	1	1	1	1	1	1	1	1	1	1	1	1	1	1	1	1	1	1	1	1
0	2	4	1	2	0	0	0	3	1	4	4	4	4	4	10	2	4	1	1	1	1	1	1	1	1	5	1	5	1	1	5	1	1	1	1	1	1	5	5	5	5	5	5	1	5	5	5	5	5
0	2	4	1	2	0	3	0	4	2	1	1	2	1	1	10	2	1	1	1	2	1	4	1	1	1	4	2	2	4	2	1	1	1	1	1	1	2	1	1	1	1	1	4	2	2	1	1	1	1
0	2	4	1	0	0	3	0	2	4	1	3	3	2	4	3	1	1	1	1	5	1	1	1	1	1	2	1	1	1	1	1	1	1	5	1	1	1	1	1	1	1	1	1	1	1	1	1	1	1
0	2	4	3	1	1	3	0	4	2	3	3	2	1	1	6	2	1	1	1	1	1	1	1	1	1	2	2	1	1	1	1	1	1	1	1	1	4	1	1	1	1	1	2	1	1	1	1	1	1
0	2	4	3	2	0	3	0	4	1	2	3	3	1	2	6	1	1	1	1	1	1	1	1	1	1	1	1	1	1	1	1	1	1	1	1	1	1	1	1	1	1	1	1	1	1	1	1	1	1
0	2	4	1	1	1	3	0	3	2	1	1	2	1	1	6	2	1	1	1	1	1	2	1	1	2	1	4	4	5	2	4	1	2	1	1	1	2	1	1	1	1	1	2	2	2	3	4	2	2
0	2	4	1	1	1	3	0	2	1	1	1	1	1	1	5	1	1	1	1	1	1	1	1	1	1	1	1	1	1	1	1	1	1	1	1	1	1	1	1	1	1	1	1	1	1	1	1	1	1
0	2	4	1	1	1	3	0	3	1	1	4	4	1	1	5	4	4	4	4	1	1	1	1	1	1	1	1	1	1	1	1	1	1	1	1	1	1	1	1	1	1	1	1	1	1	1	1	1	1
0	2	4	1	1	1	3	0	3	3	1	1	1	1	1	30	1	1	1	1	1	1	1	1	1	1	1	1	1	1	1	1	1	1	1	1	1	1	1	1	1	1	1	1	1	1	1	1	1	1
0	2	4	1	2	1	3	0	4	1	1	1	1	1	1	9	1	1	1	1	1	1	1	1	1	1	1	1	1	1	1	1	1	1	1	1	1	1	1	1	1	1	1	1	1	1	1	1	1	1
0	2	4	1	1	1	2	1	3	1	1	2	2	1	1	7	1	1	1	1	1	1	1	1	1	1	1	1	1	1	1	1	1	1	1	1	1	1	1	1	1	1	1	1	1	1	1	1	1	1
0	2	4	3	1	0	3	0	3	1	2	1	3	1	1	6	1	1	1	1	1	1	1	1	1	1	1	1	1	1	1	1	1	1	1	1	1	1	1	1	1	1	1	1	1	1	1	1	1	1
0	2	4	1	2	1	2	0	3	3	1	1	3	1	1	7	1	1	1	1	1	1	1	1	1	1	1	1	1	1	1	1	1	1	1	1	1	1	1	1	1	1	1	1	1	1	1	1	1	1
0	2	4	1	1	1	3	0	3	1	1	1	1	1	1	7	2	5	1	4	4	4	4	1	3	2	2	4	2	4	4	2	1	4	1	1	1	5	3	1	1	1	2	5	5	1	1	1	1	1
0	2	4	1	2	1	2	0	4	1	1	3	2	1	1	8	1	1	1	1	1	1	1	1	1	1	1	1	1	1	1	1	1	1	1	1	1	1	1	1	1	1	1	1	1	1	1	1	1	1
0	2	4	1	1	1	3	0	2	1	1	3	3	4	1	6	1	1	1	5	1	5	1	1	1	1	1	1	1	1	1	1	1	1	1	1	1	1	1	1	1	1	1	1	1	1	1	1	1	1
0	2	4	1	2	1	3	0	3	2	1	2	1	1	2	8	4	4	4	1	1	2	4	4	5	5	4	3	4	4	2	4	2	4	1	1	1	1	4	2	1	3	4	5	5	1	5	1	4	1
0	2	5	1	1	0	3	0	3	1	1	1	3	1	4	8	5	5	5	5	1	5	5	5	3	1	5	5	5	5	5	3	2	5	3	2	1	5	5	1	3	2	2	5	5	5	1	2	3	1
0	2	5	1	1	1	3	0	3	1	1	1	2	1	1	10	1	1	1	1	1	1	1	1	1	1	1	1	1	1	1	1	1	1	1	1	1	1	1	1	1	1	1	1	1	1	1	1	1	1
0	2	5	1	1	1	3	0	3	1	1	1	2	1	1	6	2	1	1	5	5	1	2	1	1	5	5	1	5	5	2	1	1	5	1	5	1	2	1	1	1	1	1	2	2	1	1	1	1	1
0	2	5	3	2	0	3	0	3	1	2	3	4	3	3	9	1	1	1	1	4	1	1	1	1	1	1	1	1	1	1	1	1	1	1	1	1	1	1	1	1	1	1	1	1	1	1	1	1	1
0	2	5	1	2	1	3	0	4	1	2	1	1	1	1	7	1	1	1	1	1	1	1	1	1	1	1	1	1	1	1	1	1	1	1	1	1	1	1	1	1	1	1	1	1	1	1	1	1	1
0	2	5	3	1	1	3	0	3	1	1	1	1	1	2	6	1	1	1	1	1	1	1	1	1	1	1	1	1	1	1	1	1	1	1	1	1	1	1	1	1	1	1	1	1	1	1	1	1	1
0	2	5	3	1	0	3	0	4	1	4	4	4	3	4	6	1	1	1	1	1	1	1	1	1	1	1	1	1	1	1	1	1	1	1	1	1	1	1	1	1	1	1	1	1	1	1	1	1	1
0	2	5	3	1	0	3	0	4	2	1	4	3	1	3	7	1	1	1	1	1	1	1	1	1	1	1	1	1	1	1	1	1	1	1	1	1	1	1	1	1	1	1	1	1	1	1	1	1	1
0	2	5	1	1	1	2	0	4	1	2	2	1	1	1	5	1	1	1	1	1	2	2	1	1	1	1	1	1	1	1	1	1	1	1	1	1	1	1	1	1	1	1	1	1	1	1	1	1	1
0	2	5	1	1	1	3	0	2	2	1	4	2	3	2	6	1	1	1	1	1	1	1	1	1	1	1	1	1	1	1	1	1	1	1	1	1	1	1	1	1	1	1	1	1	1	1	1	1	1
0	2	5	1	1	1	3	0	0	1	4	4	4	4	4	5	1	1	1	5	5	1	1	2	4	4	5	1	2	4	2	4	2	5	1	3	4	5	5	3	4	1	1	5	1	3	2	1	1	3
0	2	5	1	1	1	3	0	3	2	1	4	3	4	1	7	1	1	1	1	1	1	1	1	2	2	1	1	1	1	1	1	1	1	1	4	1	1	1	1	1	1	1	2	2	1	1	1	1	1
0	2	5	1	2	1	3	0	3	1	1	3	2	1	1	7	1	1	1	1	1	1	1	1	1	1	1	1	1	1	1	1	1	1	1	1	1	1	1	1	1	1	1	1	1	1	1	1	1	1
0	2	5	1	2	1	3	0	4	1	1	1	1	1	1	6	5	5	3	1	1	5	3	1	1	1	1	5	5	1	1	1	3	2	1	2	2	2	5	1	1	1	3	3	1	1	1	3	2	1
0	2	5	1	2	1	3	0	4	2	1	1	1	2	3	5	2	1	1	1	1	1	1	1	1	1	1	1	1	1	1	1	1	1	1	1	1	1	1	1	1	1	1	1	1	1	1	1	1	1
0	2	5	1	2	1	3	0	2	4	1	3	4	1	1	8	1	1	1	1	1	1	1	1	1	1	1	1	1	1	1	1	1	1	1	1	1	1	1	1	1	1	1	1	1	1	1	1	1	1
0	2	5	3	1	0	3	0	4	3	1	3	4	1	2	7	1	1	1	1	1	1	1	1	1	1	1	1	1	1	1	1	1	1	1	1	1	1	1	1	1	1	1	1	1	1	1	1	1	1
0	2	5	3	1	0	3	0	2	1	2	1	1	1	1	5	1	1	1	1	1	1	1	1	1	1	1	1	1	1	1	1	1	1	1	1	1	1	1	1	1	1	1	1	1	1	1	1	1	1
0	2	5	6	1	1	3	0	3	2	1	1	2	1	3	5	5	4	1	1	1	1	1	1	1	1	1	4	2	2	4	1	2	1	4	1	1	5	1	1	1	2	1	4	1	2	1	1	1	1
0	2	5	1	1	1	3	0	1	1	1	2	2	1	1	5	1	1	1	1	1	1	1	1	1	1	1	1	1	1	1	1	1	1	1	1	1	1	1	1	1	1	1	1	1	1	1	1	1	1
0	2	5	1	1	1	3	0	3	1	1	1	2	1	1	5	1	1	1	1	4	1	1	1	1	1	1	5	1	1	1	1	1	1	1	1	1	1	1	1	1	1	1	1	1	1	1	1	1	1
0	2	5	3	2	1	3	0	3	4	1	1	2	1	1	7	1	1	1	1	1	1	1	1	1	1	1	1	1	1	1	1	1	1	1	1	1	1	1	1	1	1	1	1	1	1	1	1	1	1
0	2	5	3	2	0	2	0	4	1	2	2	3	2	2	4	1	1	1	1	1	1	1	5	5	1	1	1	1	1	1	1	1	1	1	1	1	1	1	1	1	1	1	1	1	1	1	5	5	1
0	2	5	1	1	1	3	0	2	3	3	3	2	2	2	9	5	5	5	5	1	5	5	3	3	5	5	5	5	5	5	5	5	5	5	5	5	1	5	5	5	5	5	5	5	5	5	4	5	1
0	2	5	1	1	1	2	1	2	4	4	4	4	2	4	5	3	5	1	1	1	1	1	1	3	4	4	4	1	5	5	1	1	1	1	5	1	1	5	3	1	1	1	4	4	5	5	5	5	1
0	2	5	1	2	1	2	0	1	4	4	4	4	3	4	3	1	1	1	1	1	1	1	1	1	1	1	1	1	1	1	1	1	1	1	1	1	1	1	1	1	1	1	1	1	1	1	1	1	1
0	2	4	1	2	1	3	0	3	3	1	1	1	1	1	7	5	5	1	1	1	1	1	1	1	5	1	1	1	1	1	1	1	1	1	1	1	1	1	1	1	1	1	1	1	1	1	1	1	1
0	2	4	1	1	1	3	0	3	1	1	1	2	1	1	5	3	4	1	1	2	1	1	1	1	1	1	1	1	1	1	1	1	1	1	5	2	1	5	2	2	2	2	1	3	3	4	4	1	3
0	2	5	2	2	1	2	1	2	1	3	1	1	1	1	6	4	5	4	1	2	1	5	2	2	1	1	1	1	1	1	1	1	1	5	1	1	1	1	1	1	1	1	1	4	1	1	1	1	2
0	3	1	1	1	1	3	0	3	3	1	1	1	1	2	0	5	1	1	2	3	2	1	3	1	1	5	1	4	1	1	4	5	3	4	4	2	2	1	1	1	2	2	2	2	2	2	2	2	2
0	3	3	1	2	1	3	0	4	3	4	4	4	1	1	7	1	1	1	1	1	1	1	1	1	5	1	1	1	1	1	1	1	1	1	1	1	1	1	1	1	1	1	1	1	1	1	1	1	1
0	3	3	1	2	1	2	1	4	3	3	2	2	1	3	8	1	1	2	1	1	2	2	1	2	1	2	1	2	2	1	2	1	2	1	1	1	1	1	1	1	1	1	2	2	2	1	1	1	1
0	3	3	1	2	1	2	1	4	3	3	2	2	1	3	8	1	1	2	1	1	2	2	1	2	1	2	1	2	2	1	2	1	2	1	1	1	1	1	1	1	1	1	2	2	2	1	1	1	1
0	3	3	1	1	1	2	1	4	3	1	1	1	1	2	10	1	1	1	1	1	1	1	1	1	1	1	1	1	1	1	1	1	1	1	1	1	1	1	1	1	1	1	1	1	1	1	1	1	1
0	3	1	1	1	1	3	0	2	1	2	2	2	1	1	7	1	1	1	1	1	1	1	1	1	1	1	1	1	1	1	1	1	1	1	1	1	2	1	1	1	1	1	1	1	1	1	1	1	1
0	3	2	1	2	1	3	0	3	2	1	2	1	1	1	9	4	5	1	1	1	3	2	3	3	1	2	5	2	1	3	1	1	1	1	1	3	1	1	1	1	1	1	5	4	4	1	1	1	1
0	3	2	1	2	0	3	0	1	1	1	1	1	1	1	7	1	1	1	1	1	1	1	1	1	1	1	1	1	1	1	1	1	1	1	1	1	1	1	1	1	1	1	1	1	1	1	1	1	1
0	3	2	1	1	1	3	0	2	1	2	1	1	1	1	8	1	1	3	1	1	1	1	1	1	1	3	1	2	1	1	1	1	1	1	1	1	1	1	1	1	1	1	1	1	1	1	1	1	1
0	3	2	1	2	1	2	1	4	1	1	1	1	2	1	9	1	1	1	1	1	1	1	1	1	1	1	1	1	1	1	1	1	1	1	1	1	1	1	1	1	1	1	1	1	1	1	1	1	1
0	3	2	1	2	1	2	1	4	2	1	1	2	1	1	9	4	1	1	1	1	1	1	1	2	2	1	1	2	1	1	1	1	1	1	1	1	1	1	1	1	1	1	2	1	1	1	1	1	1
0	3	2	1	2	1	2	1	4	1	1	1	1	1	1	7	1	1	1	1	1	1	1	1	1	1	1	1	1	1	1	1	1	1	1	5	5	5	1	1	5	1	1	1	1	1	1	1	1	1
0	3	2	1	1	0	2	1	4	2	1	1	1	1	1	6	1	1	1	1	1	1	1	1	1	1	1	1	1	1	1	1	1	1	1	1	1	1	1	1	1	1	1	1	1	1	1	1	1	1
0	3	2	1	2	1	2	1	4	2	1	2	2	3	3	6	3	2	1	1	1	2	2	2	2	1	2	4	4	4	4	1	1	4	1	4	1	4	2	1	2	2	1	2	2	1	1	2	2	1
0	3	2	1	2	1	3	0	1	1	1	1	1	1	1	5	1	1	1	1	1	1	1	1	1	1	1	1	1	1	1	1	1	1	1	1	1	1	1	1	1	1	1	1	1	1	1	1	1	1
0	3	2	1	2	0	3	0	1	2	2	1	2	4	1	7	1	1	1	1	1	1	1	1	1	1	1	1	1	1	1	1	1	1	1	1	1	1	1	1	1	1	1	1	1	1	1	1	1	1
0	3	2	1	2	1	2	0	4	1	2	2	2	1	2	6	1	1	1	1	1	1	1	1	1	1	1	2	1	1	1	1	1	1	1	1	1	1	1	1	1	1	1	2	1	1	1	1	1	1
0	3	3	1	2	1	2	1	3	2	1	1	1	1	1	6	1	1	1	1	1	1	1	1	1	1	1	1	1	1	1	1	1	1	1	1	1	1	1	1	1	1	1	1	1	1	1	1	1	1
0	3	3	1	2	1	3	0	4	3	4	3	3	2	3	6	1	1	1	1	1	1	1	1	1	1	1	1	1	1	1	1	1	1	1	1	1	1	1	1	1	1	1	1	1	1	1	1	1	1
0	3	3	1	2	1	3	0	4	1	2	1	1	1	1	3	2	4	1	4	3	3	4	1	4	1	4	4	4	1	2	2	1	1	4	1	1	1	1	1	1	4	1	4	1	1	1	1	1	1
0	3	3	1	1	1	3	0	4	1	2	1	1	1	1	30	1	1	1	1	1	1	4	1	1	1	1	1	1	1	1	1	1	1	1	1	1	1	1	1	1	1	1	4	4	1	1	1	1	1
0	3	3	1	1	1	3	0	3	3	1	4	4	3	2	5	1	1	1	3	1	1	1	1	1	1	5	5	1	1	1	1	3	1	1	1	1	1	1	1	1	1	1	2	2	1	1	1	1	1
0	3	3	1	1	1	3	0	3	2	1	3	3	1	1	5	5	5	1	5	1	1	5	5	5	1	5	5	4	1	4	2	1	2	1	1	1	1	1	1	1	1	1	1	2	1	1	1	2	1
0	3	3	1	1	1	3	0	4	1	1	2	2	1	2	9	2	3	1	1	1	1	1	1	1	3	3	1	1	3	1	1	3	1	1	5	1	3	3	1	1	1	1	1	1	1	1	1	1	1
0	3	3	1	1	1	3	0	3	1	1	1	2	3	4	7	1	1	1	1	1	1	1	1	1	1	1	1	1	1	2	1	1	1	1	1	1	1	1	1	1	1	1	1	1	1	1	1	1	1
0	3	3	1	1	1	3	0	4	1	1	1	1	1	1	8	1	1	1	1	1	1	1	1	1	1	1	1	1	1	1	1	1	1	1	2	1	2	1	1	1	1	1	1	1	1	1	1	1	1
0	3	3	1	1	1	3	0	4	3	3	1	2	3	3	10	1	1	1	1	4	1	1	1	1	1	1	1	1	1	1	1	1	1	1	1	1	4	1	1	1	1	1	1	1	1	1	1	1	1
0	3	3	1	1	1	3	0	2	1	1	1	1	1	1	6	2	1	1	4	4	2	1	1	2	1	4	4	4	4	2	1	1	1	1	4	2	2	2	1	3	1	1	4	4	4	2	2	1	1
0	3	3	1	1	1	3	0	2	1	4	2	2	1	1	7	1	1	1	1	1	1	1	1	1	1	1	1	1	1	1	1	1	1	1	1	1	1	1	1	1	1	1	1	1	1	1	1	1	1
0	3	3	1	1	0	3	0	3	1	1	1	1	1	1	11	1	1	1	1	1	1	1	1	1	1	1	1	1	1	1	1	1	1	1	1	1	1	1	1	1	1	1	1	1	1	1	1	1	1
0	3	3	1	2	0	3	0	4	4	1	4	4	1	4	30	1	1	1	1	1	1	1	1	1	1	1	1	1	1	1	1	1	1	1	1	1	1	1	1	1	1	1	1	1	1	1	1	1	1
0	3	3	2	2	0	3	0	3	2	3	1	3	2	1	30	1	1	1	1	1	1	1	1	1	1	1	1	1	1	1	1	1	1	1	1	1	1	1	1	1	1	1	1	1	1	1	1	1	1
0	3	3	3	1	1	3	0	1	1	1	1	1	1	1	8	1	1	1	1	1	1	1	1	1	1	1	1	1	1	1	1	1	1	1	1	1	1	1	1	1	1	1	1	1	1	1	1	1	1
0	3	3	1	1	1	2	1	4	1	1	1	2	1	1	9	1	1	1	1	1	1	1	1	1	1	1	1	1	1	1	1	1	1	1	1	1	1	1	1	1	1	1	1	1	1	1	1	1	1
0	3	3	1	1	1	3	0	4	1	1	2	2	1	1	9	1	1	1	1	1	1	1	1	1	1	1	1	1	1	1	1	1	1	1	1	1	1	1	1	1	1	1	1	1	1	1	1	1	1
0	3	3	1	1	1	3	0	4	2	4	4	4	3	2	6	1	1	1	1	1	1	1	1	1	1	1	1	1	1	1	1	1	1	1	1	1	1	1	1	1	1	1	1	1	1	1	1	1	1
0	3	3	1	1	1	3	0	3	1	1	2	1	1	1	5	1	2	1	1	1	1	2	1	1	2	5	5	2	1	2	3	1	1	2	1	1	5	1	1	1	1	1	1	1	1	1	1	1	1
0	3	3	1	1	1	3	0	4	1	1	1	1	1	1	12	1	1	1	1	1	1	1	1	1	1	1	1	1	1	1	1	1	1	1	1	1	1	1	1	1	1	1	1	1	1	1	1	1	1
0	3	3	1	1	1	3	0	3	2	1	2	2	1	1	8	1	1	1	1	1	1	1	1	1	1	1	1	1	1	1	1	1	1	1	1	1	1	1	1	1	1	1	1	1	1	1	1	1	1
0	3	3	1	1	1	3	0	4	1	1	1	1	1	1	5	1	1	1	1	2	1	1	1	1	1	1	1	1	1	1	1	1	1	1	1	1	1	1	1	1	1	1	1	1	1	1	1	1	1
0	3	3	1	1	0	3	0	4	1	1	1	2	1	1	11	1	1	1	1	1	1	1	1	1	1	1	1	1	1	1	1	1	1	1	1	1	1	1	1	1	1	1	1	1	1	1	1	1	1
0	3	3	1	1	0	3	0	2	1	2	1	1	4	1	9	1	1	1	1	1	1	1	1	1	1	1	1	1	1	1	1	1	1	1	1	1	1	1	1	1	1	1	1	1	1	1	1	1	1
0	3	3	1	2	1	1	1	1	4	4	3	2	1	1	9	4	1	1	2	1	2	2	2	2	5	4	2	4	5	1	5	1	5	1	5	4	1	2	1	1	1	2	1	4	1	5	4	5	1
0	3	3	1	2	1	2	1	4	1	1	1	1	1	2	9	1	1	1	1	1	1	1	1	1	1	1	1	1	1	1	1	1	1	1	1	1	1	1	1	1	1	1	1	1	1	1	1	1	1
0	3	3	1	2	1	2	1	4	1	1	2	2	1	4	9	1	1	1	1	1	1	1	1	1	1	1	1	1	1	1	1	1	1	1	1	1	1	1	1	1	1	1	1	1	1	1	1	1	1
0	3	3	1	2	1	3	0	4	1	2	2	2	1	1	10	1	1	1	1	1	1	1	1	1	1	1	1	1	1	1	1	1	1	1	1	1	1	1	1	1	1	1	1	1	1	1	1	1	1
0	3	3	1	2	1	3	0	4	2	1	1	1	1	1	8	1	1	1	1	4	1	1	1	1	1	1	1	1	1	1	1	1	1	1	1	1	1	1	1	1	1	1	1	1	1	1	1	1	1
0	3	3	1	2	1	3	0	1	1	3	1	1	3	1	6	1	1	1	1	1	1	1	1	1	1	1	1	1	1	1	1	1	1	1	1	4	5	1	1	1	1	1	1	1	1	1	1	1	1
0	3	3	1	2	1	3	0	1	1	4	4	2	4	1	6	2	2	1	1	1	1	2	1	3	1	1	2	1	3	2	1	1	1	1	2	2	2	1	1	1	1	1	2	4	1	1	1	1	1
0	3	3	1	2	1	3	0	4	1	1	1	2	2	1	8	1	1	1	1	1	1	1	1	1	1	1	2	1	1	1	1	1	1	1	1	1	1	1	1	1	1	1	1	1	1	1	1	1	1
0	3	3	1	2	1	3	0	1	1	2	1	1	2	3	8	1	1	1	1	1	1	1	1	1	1	1	1	1	1	1	1	1	1	1	1	1	1	1	1	1	1	1	1	1	1	1	1	1	1
0	3	3	1	2	1	3	0	4	1	1	1	1	1	1	7	1	1	1	1	1	1	1	1	1	1	1	1	1	1	1	1	1	1	1	1	1	1	1	1	1	1	1	1	1	1	1	1	1	1
0	3	3	1	2	0	2	0	4	1	1	1	3	1	1	7	1	1	1	1	1	1	1	1	1	1	1	1	1	1	1	1	1	1	1	1	1	1	1	1	1	1	1	1	1	1	1	1	1	1
0	3	3	1	1	0	3	0	4	1	1	1	1	1	1	4	1	1	1	1	1	1	1	1	1	1	1	1	1	1	1	1	1	1	1	1	1	1	1	1	1	1	1	1	1	1	1	1	1	1
0	3	3	1	1	0	3	0	4	1	1	1	2	1	1	9	1	1	1	2	1	1	1	1	1	1	1	1	1	1	1	1	1	1	1	1	1	1	1	1	1	1	1	1	1	1	1	1	1	1
0	3	3	1	2	1	2	1	4	1	1	2	3	1	1	6	1	1	1	1	1	1	1	1	1	1	1	1	1	1	1	1	1	1	1	1	1	1	1	1	1	1	1	1	1	1	1	1	1	1
0	3	3	1	2	1	2	1	3	4	2	3	3	1	3	7	1	1	1	1	1	1	1	1	1	1	1	5	5	5	1	1	1	1	1	1	1	1	1	1	1	1	1	1	1	1	1	1	1	1
0	3	3	1	2	1	2	1	4	1	1	2	2	1	1	4	1	1	1	1	1	1	1	1	1	1	1	1	1	1	1	1	1	1	1	1	1	1	1	1	1	1	1	1	1	1	1	1	1	1
0	3	3	1	2	1	3	0	4	3	1	2	2	1	1	7	1	1	1	1	1	2	1	1	1	1	1	1	1	1	1	1	1	1	1	1	1	1	1	1	1	1	1	1	1	1	1	1	1	1
0	3	3	1	2	1	3	0	4	2	1	1	2	2	4	8	1	1	1	5	1	1	1	1	1	1	1	5	1	1	1	1	1	1	1	1	1	1	1	1	1	1	1	1	1	5	1	4	5	1
0	3	3	1	2	1	3	0	4	2	1	1	2	2	4	8	1	1	1	5	1	1	1	1	1	1	1	5	1	1	1	1	1	1	1	1	1	1	1	1	1	1	1	1	1	5	1	4	5	1
0	3	3	1	0	0	3	0	4	1	1	1	1	1	1	8	1	1	1	1	1	1	1	1	1	2	1	1	1	1	1	1	1	1	1	1	1	1	1	1	1	1	1	1	1	1	1	2	1	1
0	3	3	1	1	1	1	0	4	2	1	2	2	1	1	7	1	1	1	1	1	1	1	1	1	1	1	1	1	1	1	1	1	1	1	1	1	1	1	1	1	1	1	1	1	1	1	1	1	1
0	3	3	1	1	1	1	0	2	1	2	1	3	1	1	8	1	1	1	1	1	1	1	1	1	1	1	1	1	1	1	1	1	1	1	1	1	1	1	1	1	1	1	1	1	1	1	1	1	1
0	3	3	1	1	1	2	1	4	2	1	1	2	1	1	6	1	1	1	1	1	1	1	1	1	1	1	1	1	1	1	1	1	1	1	1	1	1	1	1	1	1	1	1	1	1	1	1	1	1
0	3	3	1	1	1	2	1	4	2	1	3	3	2	1	5	1	2	1	1	1	1	1	1	1	1	1	1	1	1	1	1	1	1	2	5	1	3	5	1	2	1	1	2	1	1	1	1	1	1
0	3	3	1	1	1	3	0	4	1	2	1	1	1	1	30	2	1	1	1	1	1	1	1	2	1	2	1	1	4	4	4	2	2	1	1	1	1	1	1	1	1	1	2	1	2	1	1	1	1
0	3	3	1	1	1	3	0	3	1	2	1	2	3	2	3	1	4	1	4	1	1	1	1	1	1	1	1	1	1	1	1	1	1	1	1	1	1	1	1	1	1	1	1	1	1	1	1	1	1
0	3	3	1	1	1	3	0	0	1	1	1	1	1	1	11	1	1	1	1	1	1	1	1	1	1	1	1	1	1	1	1	1	1	1	1	1	1	1	1	1	1	1	1	1	1	1	1	1	1
0	3	3	1	1	1	3	0	1	4	1	2	3	1	1	6	1	1	1	1	1	1	1	1	1	1	1	1	1	1	1	1	1	1	1	1	1	1	1	1	1	1	1	1	1	1	1	1	1	1
0	3	3	1	1	1	3	0	4	1	1	1	1	1	1	6	1	1	1	1	1	1	1	1	1	1	1	1	1	1	1	1	1	1	1	1	1	1	1	1	1	1	1	1	1	1	1	1	1	1
0	3	3	1	1	1	3	0	3	2	3	2	1	1	1	30	5	2	1	1	1	3	3	1	1	1	1	1	3	1	1	2	1	1	1	5	1	1	1	1	1	1	1	2	1	1	1	1	1	1
0	3	3	1	1	0	3	0	2	1	1	1	1	1	1	7	1	1	1	1	1	1	1	1	1	1	1	1	1	1	1	1	1	1	1	1	1	1	1	1	1	1	1	1	1	1	1	1	1	1
0	3	3	1	1	0	3	0	1	1	1	1	1	1	1	16	1	1	1	1	1	1	1	1	1	1	1	1	1	1	1	1	1	1	1	1	1	1	1	1	1	1	1	1	1	1	1	1	1	1
0	3	3	1	2	1	1	0	3	1	1	1	1	1	1	13	1	1	1	1	1	1	1	1	1	1	1	1	1	1	1	1	1	1	1	1	1	1	1	1	1	1	1	1	1	1	1	1	1	1
0	3	3	1	2	1	2	1	4	2	1	1	1	1	2	4	2	5	1	1	1	1	1	1	1	1	1	1	1	1	1	1	1	1	1	1	1	5	1	1	1	1	1	2	1	1	1	1	1	1
0	3	3	1	2	1	2	1	4	4	1	1	1	1	3	6	1	1	1	1	1	1	1	1	1	1	1	1	1	1	1	1	1	1	1	1	1	1	1	1	1	1	1	1	1	1	1	1	1	1
0	3	3	1	2	1	2	1	3	2	2	3	3	1	1	5	2	2	1	1	1	1	1	1	1	1	2	2	1	1	1	1	1	2	2	1	2	4	1	1	1	1	1	2	1	1	1	1	1	2
0	3	3	1	2	1	2	1	3	1	1	1	1	1	1	4	1	1	1	1	1	1	1	1	1	1	1	1	1	1	1	1	1	1	1	1	1	1	1	1	1	1	1	1	1	1	1	1	1	1
0	3	3	1	2	1	2	1	3	1	1	1	1	1	1	4	1	1	1	1	1	1	1	1	1	1	1	1	1	1	1	1	1	1	1	1	1	1	1	1	1	1	1	1	1	1	1	1	1	1
0	3	3	1	2	1	2	1	4	1	1	1	1	1	1	5	1	1	1	2	1	1	1	1	1	1	1	1	1	1	1	1	1	1	1	1	1	1	1	1	1	1	1	1	1	1	1	1	1	1
0	3	3	1	2	1	2	0	4	2	2	1	1	1	1	9	1	1	1	1	1	1	1	1	1	1	1	1	1	1	1	1	1	1	1	1	1	1	1	1	1	1	1	1	1	1	1	1	1	1
0	3	3	1	2	1	3	0	4	1	1	1	1	1	1	5	1	1	1	2	1	1	1	1	1	1	1	1	1	1	1	1	1	1	1	1	1	1	1	1	1	1	1	1	1	1	1	1	1	1
0	3	3	1	2	1	3	0	2	2	1	2	2	1	1	5	2	5	1	1	2	3	5	4	4	1	5	2	2	5	2	2	1	2	1	5	2	1	2	3	2	2	1	3	2	4	1	1	1	1
0	3	3	1	2	1	3	0	4	2	1	2	3	1	1	10	1	1	1	1	1	1	1	1	1	1	1	1	1	1	1	1	1	1	1	1	1	1	1	1	1	1	1	1	1	1	1	1	1	1
0	3	3	1	2	1	3	0	2	1	1	1	1	1	1	7	1	1	1	1	1	1	1	1	1	1	1	1	1	1	1	1	1	1	1	1	1	1	1	1	1	1	1	1	1	1	1	1	1	1
0	3	3	1	2	1	3	0	1	1	1	1	1	1	1	8	1	1	1	1	1	1	1	1	1	1	1	1	1	1	1	1	1	1	1	1	1	1	1	1	1	1	1	1	1	1	1	1	1	1
0	3	3	1	2	1	3	0	3	1	1	2	1	2	1	5	1	1	1	2	2	1	1	1	1	1	1	1	1	1	1	1	1	1	1	1	1	1	1	1	1	1	1	1	1	1	1	1	1	1
0	3	3	1	2	1	3	0	3	1	1	2	1	2	1	5	1	1	1	2	2	1	1	1	1	1	1	1	1	1	1	1	1	1	1	1	1	1	1	1	1	1	1	1	1	1	1	1	1	1
0	3	3	1	2	0	2	0	4	1	1	1	1	1	1	7	1	1	1	4	1	1	1	1	1	1	1	1	1	1	1	1	1	1	1	1	1	1	1	1	1	1	1	1	1	1	1	1	1	1
0	3	3	1	2	0	2	0	1	2	2	2	2	2	1	7	1	1	1	1	1	1	1	1	1	1	1	1	1	1	1	1	3	1	1	4	1	2	1	1	1	1	1	1	1	1	3	1	1	1
0	3	3	3	1	1	3	0	2	1	1	4	2	2	1	10	1	1	1	1	1	1	2	1	1	1	1	1	1	1	1	1	1	1	1	1	1	2	1	1	1	1	1	1	1	1	1	1	1	1
0	3	3	3	1	1	3	0	1	2	2	3	4	2	1	6	1	1	1	1	1	1	1	1	1	1	1	1	1	1	1	1	1	1	1	1	1	1	1	1	1	1	1	1	1	1	1	1	1	1
0	3	3	3	1	0	3	0	3	1	2	3	4	2	1	5	1	1	1	1	1	1	1	1	1	1	1	1	1	1	1	2	1	1	1	2	1	1	2	1	1	1	1	1	1	1	2	2	2	1
0	3	3	3	0	0	3	0	3	1	1	2	1	1	1	7	1	1	1	1	1	1	1	1	1	1	1	1	1	1	1	1	1	1	1	1	1	1	1	1	1	1	1	1	1	1	1	1	1	1
0	3	3	1	1	1	1	0	4	1	1	1	1	2	1	8	1	1	1	1	1	1	1	1	1	1	1	1	1	1	1	1	1	1	1	1	1	1	1	1	1	1	1	1	1	1	1	1	1	1
0	3	3	1	1	1	3	0	3	1	1	4	4	1	1	9	1	1	1	1	1	1	1	1	1	1	1	1	1	1	1	1	1	1	1	1	1	1	1	1	1	1	1	1	1	1	1	1	1	1
0	3	3	1	2	1	2	1	3	1	1	2	2	1	1	6	1	1	1	5	5	1	1	1	1	1	1	1	1	1	1	1	1	1	1	1	1	1	1	1	1	1	1	1	1	1	1	1	1	1
0	3	3	1	2	1	2	1	3	1	1	2	2	1	1	6	1	1	1	5	5	1	1	1	1	1	1	1	1	1	1	1	1	1	1	1	1	1	1	1	1	1	1	1	1	1	1	1	1	1
0	3	3	1	2	1	2	0	4	1	1	2	3	2	2	5	2	1	1	1	1	1	2	1	2	1	4	4	4	1	1	2	1	1	1	1	1	1	1	1	1	1	1	4	4	1	1	1	1	1
0	3	3	1	2	1	3	0	3	2	1	2	1	1	1	7	2	1	3	1	3	1	3	1	3	1	3	4	3	1	3	1	1	1	3	1	3	4	1	1	1	1	1	3	3	3	1	1	1	1
0	3	3	1	2	1	3	0	1	1	2	3	2	1	2	8	4	2	1	1	2	2	5	3	3	2	5	5	4	1	1	5	1	5	2	1	1	1	1	1	2	1	1	4	1	2	1	1	3	1
0	3	3	1	2	0	3	0	1	1	1	4	2	1	1	3	4	2	1	1	1	2	1	1	1	2	1	2	1	4	4	1	1	1	1	1	1	2	1	1	1	1	1	5	2	1	1	1	1	1
0	3	3	1	1	1	3	0	0	1	1	2	2	1	1	8	1	1	1	1	1	1	1	1	1	1	1	1	1	1	1	1	1	1	1	1	1	1	1	1	1	1	1	1	1	1	1	1	1	1
0	3	3	1	2	1	3	0	4	1	1	1	1	1	1	8	1	1	1	1	1	1	1	1	1	1	1	1	1	1	1	1	1	1	1	1	1	1	1	1	1	1	1	1	1	1	1	1	1	1
0	3	3	1	2	1	3	0	4	1	1	1	1	1	1	8	1	1	1	1	1	1	1	1	1	1	1	1	1	1	1	1	1	1	1	1	1	1	1	1	1	1	1	1	1	1	1	1	1	1
0	3	3	1	2	1	2	1	4	1	1	2	1	1	1	3	1	1	1	1	1	1	1	1	1	1	1	5	1	1	1	1	1	1	1	1	1	1	1	1	1	1	1	1	1	1	1	1	1	1
0	3	3	1	1	1	3	0	1	1	2	1	1	2	1	30	1	1	1	1	1	1	1	1	1	1	1	1	1	1	1	1	1	1	1	1	1	1	1	1	1	1	1	1	1	1	1	1	1	1
0	3	3	1	2	0	3	0	2	2	2	2	2	1	1	2	1	1	1	1	1	1	1	1	1	1	1	1	1	1	1	1	1	1	1	1	1	1	1	1	1	1	1	1	1	1	1	1	1	1
0	3	3	1	1	1	3	0	2	1	1	1	1	1	1	5	1	1	2	1	5	2	1	1	3	2	2	1	4	1	1	1	1	1	4	1	1	1	1	1	1	1	1	4	4	1	1	1	1	1
0	3	3	1	2	1	3	0	3	1	1	1	2	1	1	6	2	1	1	1	1	1	2	1	2	1	1	2	1	1	1	1	1	1	1	1	1	1	1	1	1	1	1	4	4	2	1	1	1	1
0	3	3	2	2	1	3	0	2	2	1	1	1	1	1	8	1	1	1	1	1	1	1	1	1	1	1	2	2	1	1	1	1	1	1	1	1	1	1	1	1	1	1	1	1	1	1	1	1	1
0	3	3	1	2	0	3	0	3	2	1	1	1	1	1	5	1	1	1	1	1	1	1	1	1	1	1	2	1	1	1	1	1	1	1	1	1	1	1	1	1	1	1	1	1	1	1	1	1	1
0	3	3	1	2	1	2	1	3	2	2	3	3	1	3	6	1	1	1	1	1	1	1	1	1	1	1	1	1	1	1	1	1	1	1	1	1	1	1	1	1	1	1	1	1	1	1	1	1	1
0	3	3	1	2	1	3	0	4	1	1	1	1	1	1	7	1	1	1	1	1	1	1	1	1	1	1	1	1	1	1	1	1	1	1	1	1	1	1	1	1	1	1	1	1	1	1	1	1	1
0	3	3	1	1	0	3	0	4	3	1	1	2	1	1	30	3	1	1	1	1	1	1	1	1	1	1	5	1	1	1	1	1	1	1	1	1	1	1	1	1	1	1	1	1	1	1	1	1	1
0	3	3	1	2	1	2	0	3	2	1	1	1	1	1	6	1	4	1	1	1	1	2	1	1	1	1	4	1	1	2	1	1	1	1	1	1	2	1	1	1	1	1	2	2	1	1	1	1	1
0	3	4	1	1	0	3	0	2	1	3	4	4	1	2	6	1	1	1	1	1	1	1	1	1	1	1	1	1	1	1	1	1	1	1	1	1	1	1	1	1	1	1	1	1	1	1	1	1	1
0	3	4	2	1	0	1	1	2	1	4	4	4	1	1	30	1	1	1	1	5	1	1	1	1	1	1	1	1	1	1	1	1	1	1	1	1	1	1	1	1	1	1	1	1	1	1	1	1	1
0	3	4	1	1	1	3	0	3	1	2	1	1	1	1	6	2	4	1	1	2	2	2	1	2	3	3	4	5	3	2	5	1	5	4	5	3	3	3	1	1	1	1	4	4	1	3	1	5	1
0	3	4	1	1	1	3	0	4	1	1	1	1	1	1	4	4	2	1	1	1	1	5	1	3	1	1	4	5	5	4	2	1	1	2	1	1	1	4	1	5	1	2	5	5	5	1	1	1	1
0	3	4	1	1	0	3	0	3	1	2	1	4	1	1	30	3	1	1	1	1	1	3	1	1	1	1	1	1	1	1	1	1	1	1	1	1	1	1	1	1	1	1	1	1	1	1	1	1	1
0	3	4	1	2	1	3	0	4	4	3	1	1	1	1	8	1	1	1	1	1	1	1	1	1	1	1	1	1	1	1	1	1	1	1	1	1	1	1	1	1	1	1	1	1	1	1	1	1	5
0	3	4	1	2	1	3	0	4	1	2	1	2	1	1	12	1	1	1	1	1	1	1	1	1	1	1	1	1	1	1	1	1	1	1	1	1	1	1	1	1	1	1	1	1	1	1	1	1	1
0	3	4	1	2	0	3	0	4	1	1	2	1	1	1	9	1	1	1	2	1	1	2	1	1	1	1	1	1	1	1	1	1	1	1	1	1	1	1	1	1	1	1	1	1	1	1	1	1	1
0	3	4	1	1	1	3	0	2	2	2	4	4	3	2	7	2	3	1	1	1	1	1	1	1	1	1	1	1	1	1	1	1	1	1	1	1	1	1	1	1	1	1	1	1	1	1	1	1	1
0	3	4	1	1	1	3	0	1	3	4	4	1	1	1	8	1	1	1	1	1	1	1	1	1	1	1	1	1	1	1	1	1	1	1	1	1	1	1	1	1	1	1	1	1	1	1	1	1	1
0	3	4	1	1	0	3	0	1	1	1	4	4	4	1	6	1	1	1	1	1	1	1	1	1	1	1	1	1	1	1	1	1	1	1	1	1	1	1	1	1	1	1	1	1	1	1	1	1	1
0	3	4	1	2	1	3	0	2	4	4	4	4	2	3	8	1	1	1	2	1	1	1	1	1	1	1	4	1	1	1	1	1	1	1	1	1	1	1	1	1	1	1	1	1	1	1	1	1	1
0	3	4	1	0	0	3	0	1	2	3	3	3	2	1	7	1	1	1	1	1	1	1	1	1	1	1	1	1	1	1	1	1	1	1	1	1	1	1	1	1	1	1	1	1	1	1	1	1	1
0	3	4	2	1	0	3	0	2	1	2	2	2	1	1	7	1	1	1	1	1	1	1	1	1	1	1	1	1	1	1	1	1	1	1	1	1	1	1	1	1	1	1	1	1	1	1	1	1	1
0	3	4	1	2	0	3	0	1	1	1	1	1	1	1	6	1	1	1	1	1	1	1	1	1	1	1	1	1	1	1	1	1	1	1	1	1	1	1	1	1	1	1	1	1	1	1	1	1	1
0	3	4	1	2	0	2	0	4	1	1	1	1	1	3	7	1	1	1	1	1	1	1	1	1	1	1	1	1	1	1	1	1	1	1	1	1	1	1	1	1	1	1	1	1	1	1	1	1	1
0	3	4	1	2	1	2	1	3	2	1	1	2	1	1	8	1	1	1	1	1	1	1	1	1	1	1	1	1	1	1	1	1	1	1	1	1	1	1	1	1	1	1	1	1	1	1	1	1	1
0	3	4	1	1	1	3	0	2	1	1	1	1	3	1	7	4	4	3	3	2	5	4	1	1	1	2	2	2	1	2	1	2	1	4	1	1	3	1	1	1	1	3	3	3	1	3	1	1	1
0	3	4	1	1	1	3	0	1	1	3	3	2	2	1	12	1	1	1	1	1	1	1	1	1	1	1	1	1	1	1	1	1	1	1	1	1	1	1	1	1	1	1	1	1	1	1	1	1	1
0	3	4	1	1	0	3	0	2	4	4	1	2	1	1	10	4	4	1	1	1	1	4	4	1	1	1	5	1	4	1	1	1	1	1	1	4	4	4	1	1	1	1	5	1	1	1	1	1	1
0	3	4	1	1	1	3	0	3	2	1	3	3	3	1	7	2	2	1	1	1	1	1	1	1	1	1	1	1	1	1	1	1	1	1	1	1	1	1	1	1	1	1	2	1	1	1	1	1	1
0	3	5	1	2	1	2	1	4	1	1	1	1	1	1	7	1	1	1	1	1	1	1	1	1	1	1	1	1	5	1	1	1	1	1	1	1	1	1	1	1	1	1	1	1	1	1	1	1	1
0	3	5	1	1	0	3	0	3	1	1	1	1	1	1	6	1	1	1	1	1	1	1	1	1	1	1	1	1	1	1	1	1	1	1	1	1	1	1	1	1	1	1	1	1	1	1	1	1	1
0	3	5	1	1	1	3	0	1	2	2	1	1	2	1	8	1	1	1	1	1	1	1	1	1	1	1	1	1	1	1	1	1	1	1	1	1	1	1	1	1	1	1	1	1	1	1	1	1	1
0	3	5	1	2	1	3	0	3	1	1	1	2	1	2	6	1	2	1	1	1	1	1	1	1	1	1	1	1	1	1	1	1	1	1	1	1	1	1	1	1	1	1	1	1	1	1	1	1	1
0	3	3	1	2	1	3	0	3	2	1	1	1	1	1	7	1	1	1	1	1	1	1	1	1	1	1	1	1	1	1	1	1	1	1	1	1	1	1	1	1	1	1	1	1	1	1	1	1	1
0	3	3	1	2	1	2	0	4	2	1	2	2	1	1	6	1	1	1	2	1	1	1	1	2	4	3	4	1	1	1	1	1	1	1	1	1	2	1	1	1	1	1	1	1	1	1	1	1	1
0	3	3	1	1	1	3	0	1	1	1	1	1	1	1	8	2	2	1	1	2	1	2	1	1	2	1	5	2	4	1	4	1	2	1	1	1	1	1	1	1	1	1	1	1	1	1	1	1	1
0	3	3	1	2	0	3	0	2	3	4	4	4	3	4	7	1	1	1	1	3	1	1	1	1	1	1	3	1	5	1	5	1	1	1	1	1	1	1	1	1	1	1	1	1	1	1	1	1	1
0	3	3	1	1	1	3	0	3	4	1	1	1	1	1	3	1	1	1	1	1	1	1	1	1	1	1	1	1	1	1	1	1	1	1	1	1	2	1	1	1	1	1	1	1	1	1	1	1	1
0	3	3	1	2	0	2	0	4	4	1	2	2	1	2	6	1	1	1	1	1	1	1	1	1	1	1	1	1	1	1	1	1	1	1	1	1	1	1	1	1	1	1	1	1	1	1	1	1	1
0	3	3	1	2	1	1	1	4	2	1	1	1	1	1	5	2	1	1	1	1	1	1	1	1	1	1	2	5	5	4	1	2	2	1	5	1	1	3	1	1	2	3	5	5	1	1	1	1	1
[truncated: 20 more columns]
